# Supplementary material for: Semisynthesis, characterisation, and antibacterial evaluation of a novel lecanoric acid-derived amide library
Source: publisher site journal article supplement (doi:10.3762/bjoc.22.81), 2026-07-01
Supplement: Additional file 1 [file 1860-5397-22-81-S1.pdf]

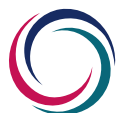

## Supporting Information

for

### **Semisynthesis, characterisation, and antibacterial evaluation of a novel lecanoric acid-derived amide library**

Ethan D. Abbott, Sasha Hayes, Jonathan M. White, Bernd H. A. Rehm and Rohan A. Davis

*Beilstein J. Org. Chem.* **2026**, 22, 1023–1032. [doi:10.3762/bjoc.22.81](https://doi.org/10.3762/bjoc.22.81)

### **NMR data tables and 1D/2D NMR spectra for natural products 1–5 and semisynthetic amide analogues 6–13, additionally, HRESIMS data for all semisynthetics**

## Table of contents

|                                                                                                                      |     |
|----------------------------------------------------------------------------------------------------------------------|-----|
| <sup>1</sup> H NMR spectrum of lecanoric acid ( <b>1</b> ) in DMSO- <i>d</i> <sub>6</sub> .....                      | S5  |
| <sup>1</sup> H NMR spectrum of lecanoric acid ( <b>1</b> ) in DMSO- <i>d</i> <sub>6</sub> and D <sub>2</sub> O ..... | S6  |
| <sup>13</sup> C NMR spectrum of lecanoric acid ( <b>1</b> ) in DMSO- <i>d</i> <sub>6</sub> .....                     | S7  |
| HSQC spectrum of lecanoric acid ( <b>1</b> ) in DMSO- <i>d</i> <sub>6</sub> .....                                    | S8  |
| HMBC spectrum of lecanoric acid ( <b>1</b> ) in DMSO- <i>d</i> <sub>6</sub> .....                                    | S9  |
| COSY spectrum of lecanoric acid ( <b>1</b> ) in DMSO- <i>d</i> <sub>6</sub> .....                                    | S10 |
| ROESY spectrum of lecanoric acid ( <b>1</b> ) in DMSO- <i>d</i> <sub>6</sub> .....                                   | S11 |
| NMR data table for lecanoric acid ( <b>1</b> ) in DMSO- <i>d</i> <sub>6</sub> .....                                  | S12 |
| <sup>1</sup> H NMR spectrum of divaricatic acid ( <b>2</b> ) in DMSO- <i>d</i> <sub>6</sub> .....                    | S13 |
| <sup>13</sup> C NMR spectrum of divaricatic acid ( <b>2</b> ) in DMSO- <i>d</i> <sub>6</sub> .....                   | S14 |
| NMR data table for divaricatic acid ( <b>2</b> ) in DMSO- <i>d</i> <sub>6</sub> .....                                | S15 |
| <sup>1</sup> H NMR spectrum of orcinol ( <b>3</b> ) in CD <sub>3</sub> OD .....                                      | S16 |
| <sup>13</sup> C NMR spectrum of orcinol ( <b>3</b> ) in CD <sub>3</sub> OD .....                                     | S17 |
| NMR data table for orcinol ( <b>3</b> ) in CD <sub>3</sub> OD .....                                                  | S18 |
| <sup>1</sup> H NMR spectrum of orsellinic acid ( <b>4</b> ) in DMSO- <i>d</i> <sub>6</sub> .....                     | S19 |
| <sup>13</sup> C NMR spectrum of orsellinic acid ( <b>4</b> ) in DMSO- <i>d</i> <sub>6</sub> .....                    | S20 |
| NMR data table for orsellinic acid ( <b>4</b> ) in DMSO- <i>d</i> <sub>6</sub> .....                                 | S21 |
| <sup>1</sup> H NMR spectrum of methyl orsellinate ( <b>5</b> ) in CDCl <sub>3</sub> .....                            | S22 |
| <sup>13</sup> C NMR spectrum of methyl orsellinate ( <b>5</b> ) in CDCl <sub>3</sub> .....                           | S23 |
| NMR data table for methyl orsellinate ( <b>5</b> ) in CDCl <sub>3</sub> .....                                        | S24 |

|                                                                                                            |     |
|------------------------------------------------------------------------------------------------------------|-----|
| <sup>1</sup> H NMR spectrum of compound <b>6</b> in DMSO- <i>d</i> <sub>6</sub> .....                      | S25 |
| <sup>1</sup> H NMR spectrum of compound <b>6</b> in DMSO- <i>d</i> <sub>6</sub> and D <sub>2</sub> O ..... | S26 |
| <sup>13</sup> C NMR spectrum of compound <b>6</b> in DMSO- <i>d</i> <sub>6</sub> .....                     | S27 |
| HSQC spectrum of compound <b>6</b> in DMSO- <i>d</i> <sub>6</sub> .....                                    | S28 |
| HMBC spectrum of compound <b>6</b> in DMSO- <i>d</i> <sub>6</sub> .....                                    | S29 |
| COSY spectrum of compound <b>6</b> in DMSO- <i>d</i> <sub>6</sub> .....                                    | S30 |
| ROESY spectrum of compound <b>6</b> in DMSO- <i>d</i> <sub>6</sub> .....                                   | S31 |
| NMR data table for compound <b>6</b> in DMSO- <i>d</i> <sub>6</sub> .....                                  | S32 |
| High resolution mass spectrum of compound <b>6</b> .....                                                   | S33 |
| <sup>1</sup> H NMR spectrum of compound <b>7</b> in DMSO- <i>d</i> <sub>6</sub> .....                      | S34 |
| <sup>13</sup> C NMR spectrum of compound <b>7</b> in DMSO- <i>d</i> <sub>6</sub> .....                     | S35 |
| HSQC spectrum of compound <b>7</b> in DMSO- <i>d</i> <sub>6</sub> .....                                    | S36 |
| HMBC spectrum of compound <b>7</b> in DMSO- <i>d</i> <sub>6</sub> .....                                    | S37 |
| COSY spectrum of compound <b>7</b> in DMSO- <i>d</i> <sub>6</sub> .....                                    | S38 |
| ROESY spectrum of compound <b>7</b> in DMSO- <i>d</i> <sub>6</sub> .....                                   | S39 |
| NMR data table for compound <b>7</b> in DMSO- <i>d</i> <sub>6</sub> .....                                  | S40 |
| High resolution mass spectrum of compound <b>7</b> .....                                                   | S41 |
| <sup>1</sup> H NMR spectrum of compound <b>8</b> in DMSO- <i>d</i> <sub>6</sub> .....                      | S42 |
| <sup>13</sup> C NMR spectrum of compound <b>8</b> in DMSO- <i>d</i> <sub>6</sub> .....                     | S43 |
| HSQC spectrum of compound <b>8</b> in DMSO- <i>d</i> <sub>6</sub> .....                                    | S44 |
| HMBC spectrum of compound <b>8</b> in DMSO- <i>d</i> <sub>6</sub> .....                                    | S45 |
| COSY spectrum of compound <b>8</b> in DMSO- <i>d</i> <sub>6</sub> .....                                    | S46 |
| ROESY spectrum of compound <b>8</b> in DMSO- <i>d</i> <sub>6</sub> .....                                   | S47 |

|                                                                                         |     |
|-----------------------------------------------------------------------------------------|-----|
| NMR data table for compound <b>8</b> in DMSO- <i>d</i> <sub>6</sub> .....               | S48 |
| High resolution mass spectrum of compound <b>8</b> .....                                | S49 |
| <sup>1</sup> H NMR spectrum of compound <b>9</b> in DMSO- <i>d</i> <sub>6</sub> .....   | S50 |
| <sup>13</sup> C NMR spectrum of compound <b>9</b> in DMSO- <i>d</i> <sub>6</sub> .....  | S51 |
| HSQC spectrum of compound <b>9</b> in DMSO- <i>d</i> <sub>6</sub> .....                 | S52 |
| HMBC spectrum of compound <b>9</b> in DMSO- <i>d</i> <sub>6</sub> .....                 | S53 |
| COSY spectrum of compound <b>9</b> in DMSO- <i>d</i> <sub>6</sub> .....                 | S54 |
| ROESY spectrum of compound <b>9</b> in DMSO- <i>d</i> <sub>6</sub> .....                | S55 |
| NMR data table for compound <b>9</b> in DMSO- <i>d</i> <sub>6</sub> .....               | S56 |
| High resolution mass spectrum of compound <b>9</b> .....                                | S57 |
| <sup>1</sup> H NMR spectrum of compound <b>10</b> in DMSO- <i>d</i> <sub>6</sub> .....  | S58 |
| <sup>13</sup> C NMR spectrum of compound <b>10</b> in DMSO- <i>d</i> <sub>6</sub> ..... | S59 |
| HSQC spectrum of compound <b>10</b> in DMSO- <i>d</i> <sub>6</sub> .....                | S60 |
| HMBC spectrum of compound <b>10</b> in DMSO- <i>d</i> <sub>6</sub> .....                | S61 |
| COSY spectrum of compound <b>10</b> in DMSO- <i>d</i> <sub>6</sub> .....                | S62 |
| ROESY spectrum of compound <b>10</b> in DMSO- <i>d</i> <sub>6</sub> .....               | S63 |
| NMR data table for compound <b>10</b> in DMSO- <i>d</i> <sub>6</sub> .....              | S64 |
| High resolution mass spectrum of compound <b>10</b> .....                               | S65 |
| <sup>1</sup> H NMR spectrum of compound <b>11</b> in DMSO- <i>d</i> <sub>6</sub> .....  | S66 |
| <sup>13</sup> C NMR spectrum of compound <b>11</b> in DMSO- <i>d</i> <sub>6</sub> ..... | S67 |
| HSQC spectrum of compound <b>11</b> in DMSO- <i>d</i> <sub>6</sub> .....                | S68 |
| HMBC spectrum of compound <b>11</b> in DMSO- <i>d</i> <sub>6</sub> .....                | S69 |
| COSY spectrum of compound <b>11</b> in DMSO- <i>d</i> <sub>6</sub> .....                | S70 |

|                                                                                                            |     |
|------------------------------------------------------------------------------------------------------------|-----|
| ROESY spectrum of compound <b>11</b> in DMSO- <i>d</i> <sub>6</sub> .....                                  | S71 |
| NMR data table for compound <b>11</b> in DMSO- <i>d</i> <sub>6</sub> .....                                 | S72 |
| High resolution mass spectrum of compound <b>11</b> .....                                                  | S73 |
| <sup>1</sup> H NMR spectrum of compound <b>12</b> in DMSO- <i>d</i> <sub>6</sub> .....                     | S74 |
| <sup>1</sup> H NMR spectrum of compound <b>12</b> in DMSO- <i>d</i> <sub>6</sub> and D <sub>2</sub> O..... | S75 |
| <sup>13</sup> C NMR spectrum of compound <b>12</b> in DMSO- <i>d</i> <sub>6</sub> .....                    | S76 |
| HSQC spectrum of compound <b>12</b> in DMSO- <i>d</i> <sub>6</sub> .....                                   | S77 |
| HMBC spectrum of compound <b>12</b> in DMSO- <i>d</i> <sub>6</sub> .....                                   | S78 |
| COSY spectrum of compound <b>12</b> in DMSO- <i>d</i> <sub>6</sub> .....                                   | S79 |
| ROESY spectrum of compound <b>12</b> in DMSO- <i>d</i> <sub>6</sub> .....                                  | S80 |
| NMR data table for compound <b>12</b> in DMSO- <i>d</i> <sub>6</sub> .....                                 | S81 |
| High resolution mass spectrum of compound <b>12</b> .....                                                  | S82 |
| <sup>1</sup> H NMR spectrum of compound <b>13</b> in DMSO- <i>d</i> <sub>6</sub> .....                     | S83 |
| <sup>13</sup> C NMR spectrum of compound <b>13</b> in DMSO- <i>d</i> <sub>6</sub> .....                    | S84 |
| HSQC spectrum of compound <b>13</b> in DMSO- <i>d</i> <sub>6</sub> .....                                   | S85 |
| HMBC spectrum of compound <b>13</b> in DMSO- <i>d</i> <sub>6</sub> .....                                   | S86 |
| COSY spectrum of compound <b>13</b> in DMSO- <i>d</i> <sub>6</sub> .....                                   | S87 |
| ROESY spectrum of compound <b>13</b> in DMSO- <i>d</i> <sub>6</sub> .....                                  | S88 |
| NMR data table for compound <b>13</b> in DMSO- <i>d</i> <sub>6</sub> .....                                 | S89 |
| High resolution mass spectrum of compound <b>13</b> .....                                                  | S90 |

<sup>1</sup>H NMR spectrum of lecanoric acid (1) in DMSO-d<sub>6</sub>

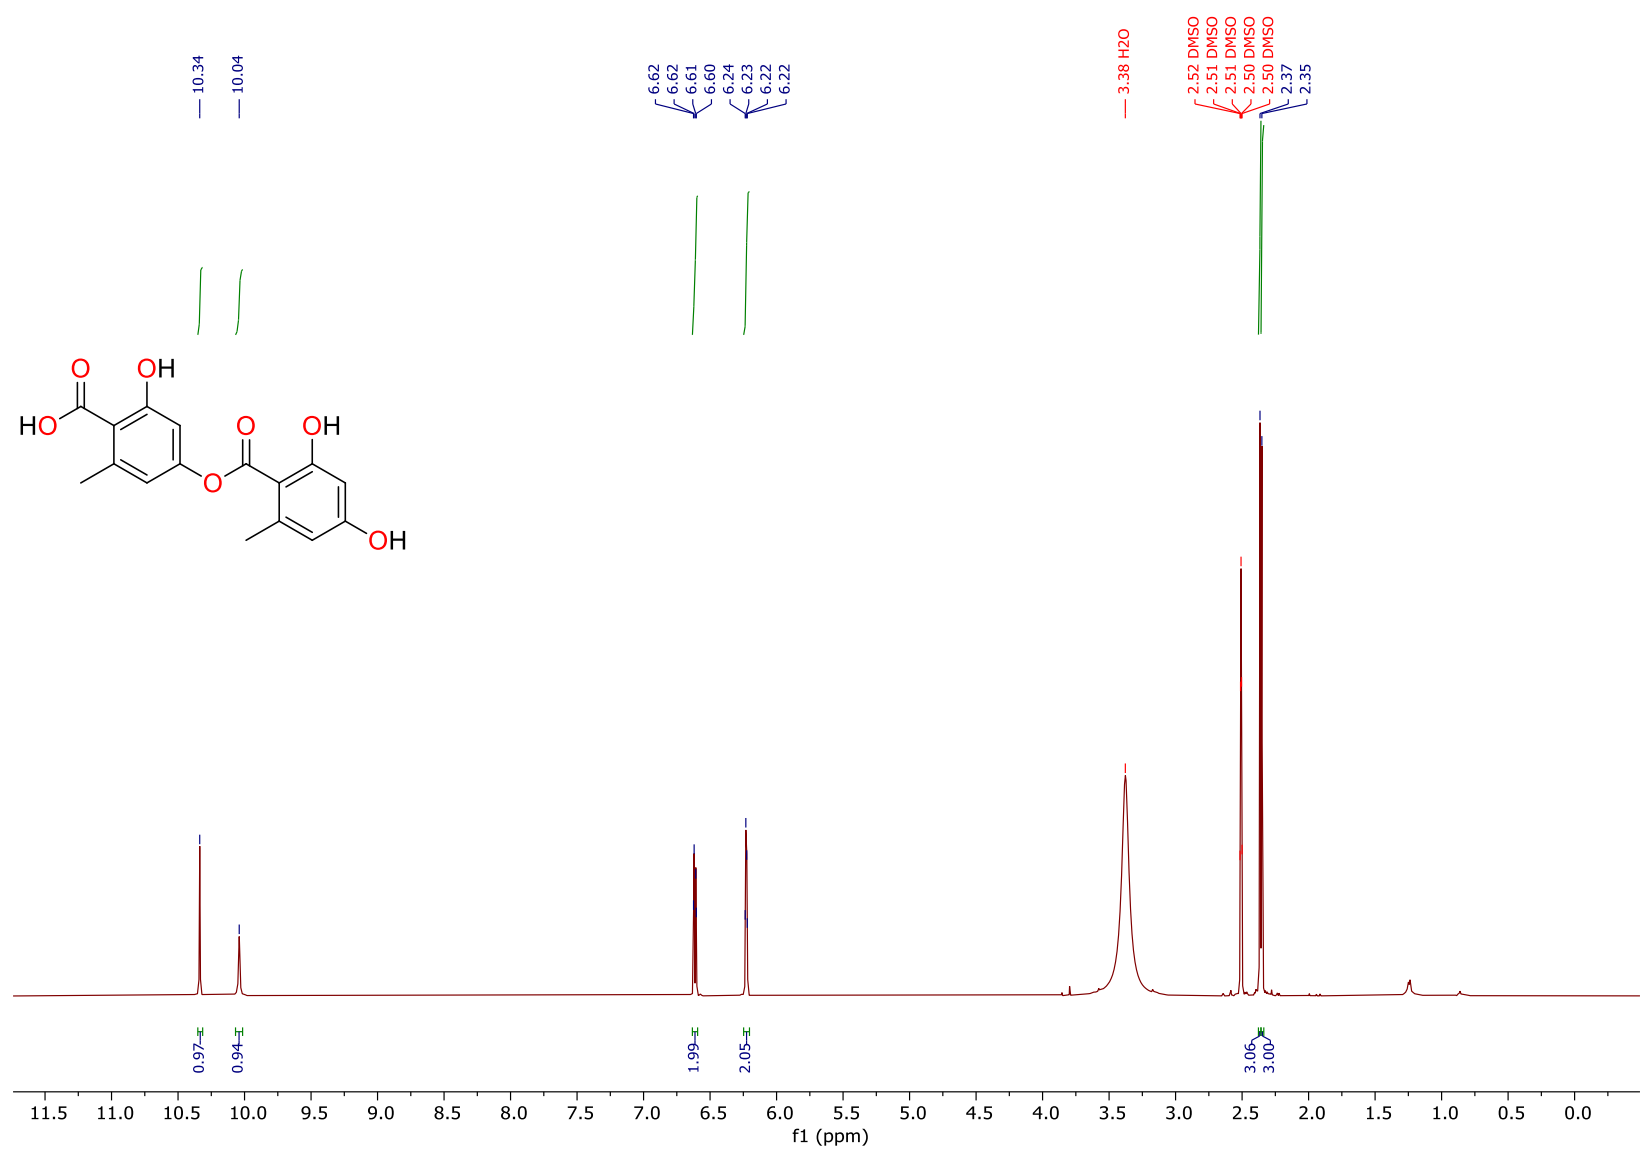

$^1\text{H}$  NMR spectrum of lecanoric acid (**1**) in  $\text{DMSO-}d_6$  and  $\text{D}_2\text{O}$

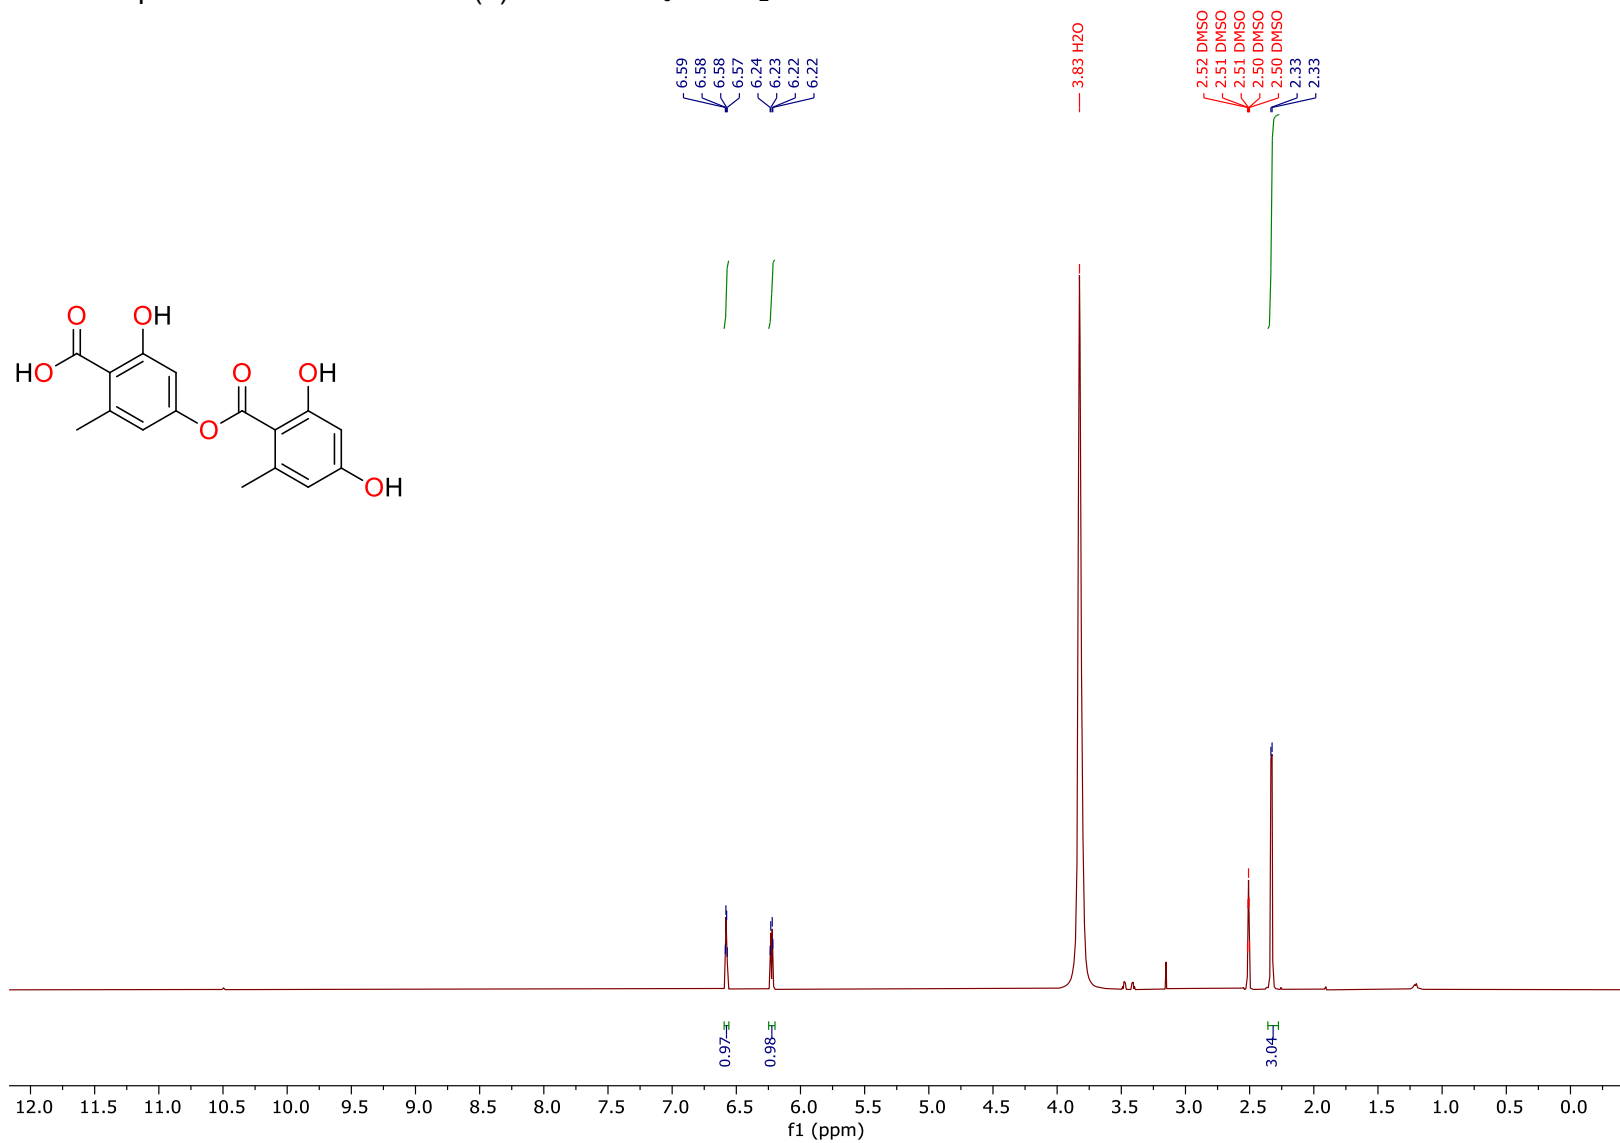

<sup>13</sup>C NMR spectrum of lecanoric acid (**1**) in DMSO-*d*<sub>6</sub>

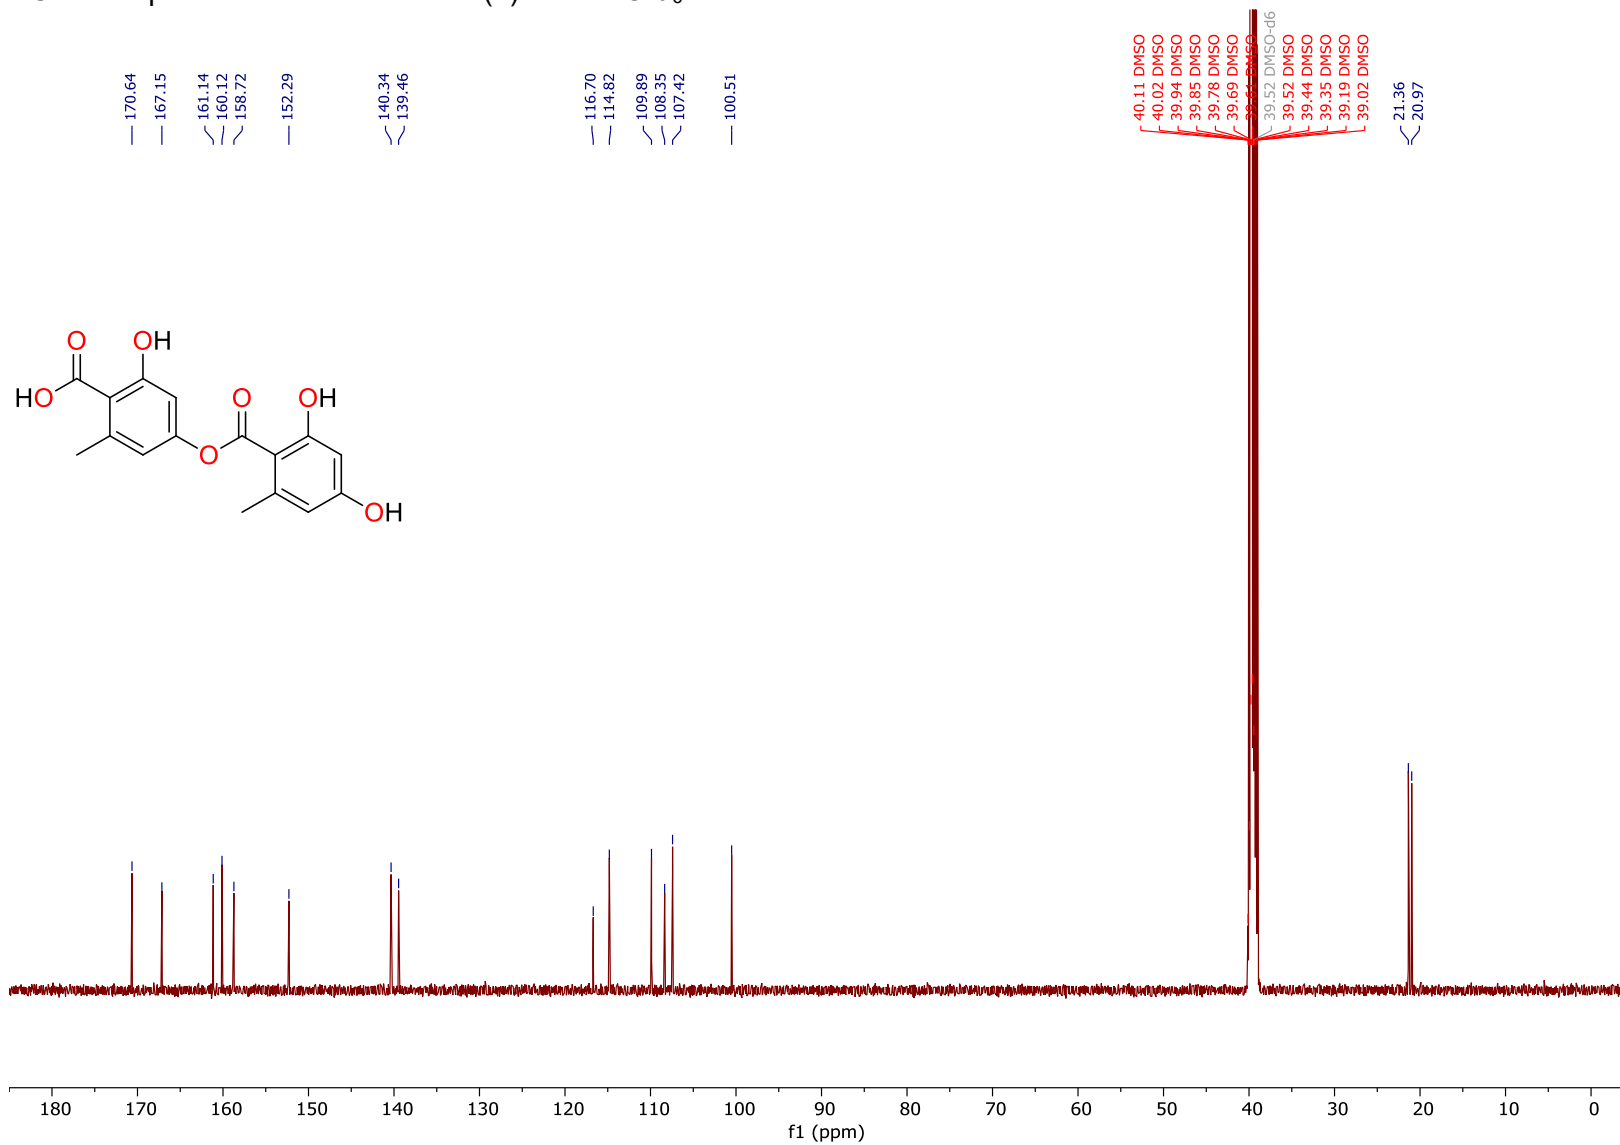

HSQC spectrum of lecanoric acid (**1**) in DMSO- $d_6$

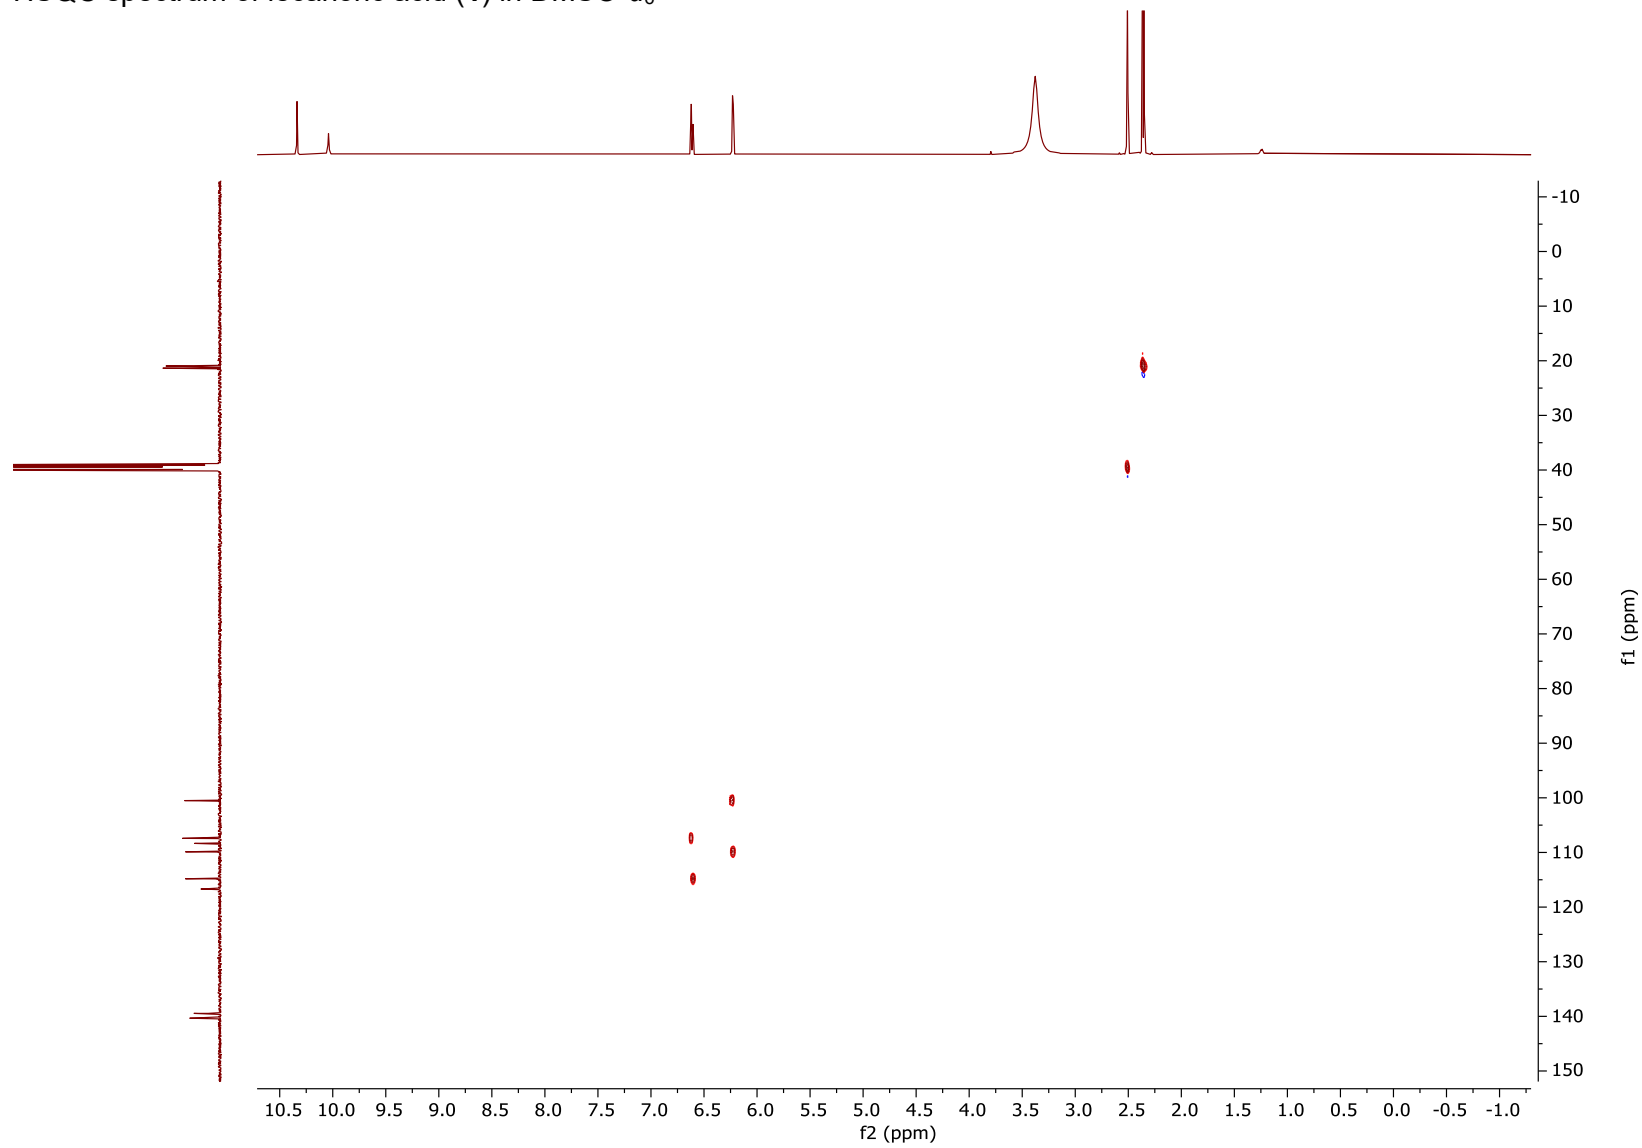

HMBC spectrum of lecanoric acid (**1**) in DMSO- $d_6$

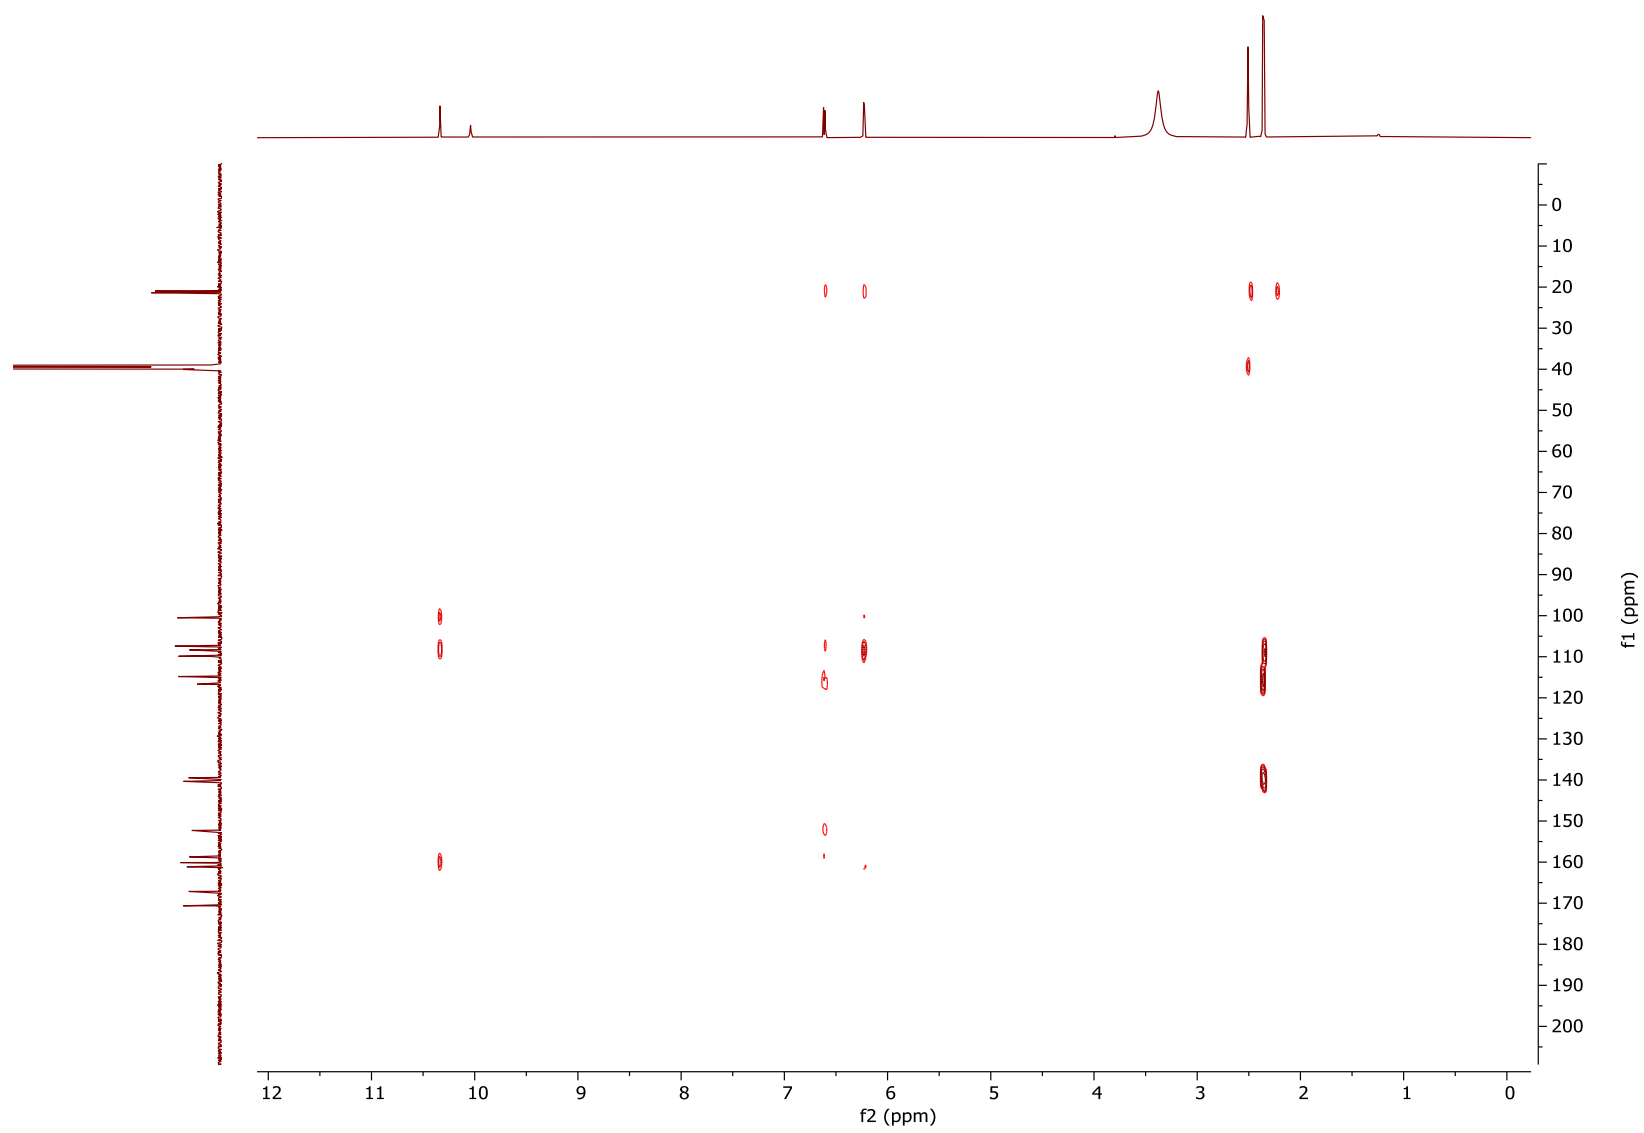

COSY spectrum of lecanoric acid (1) in DMSO- $d_6$

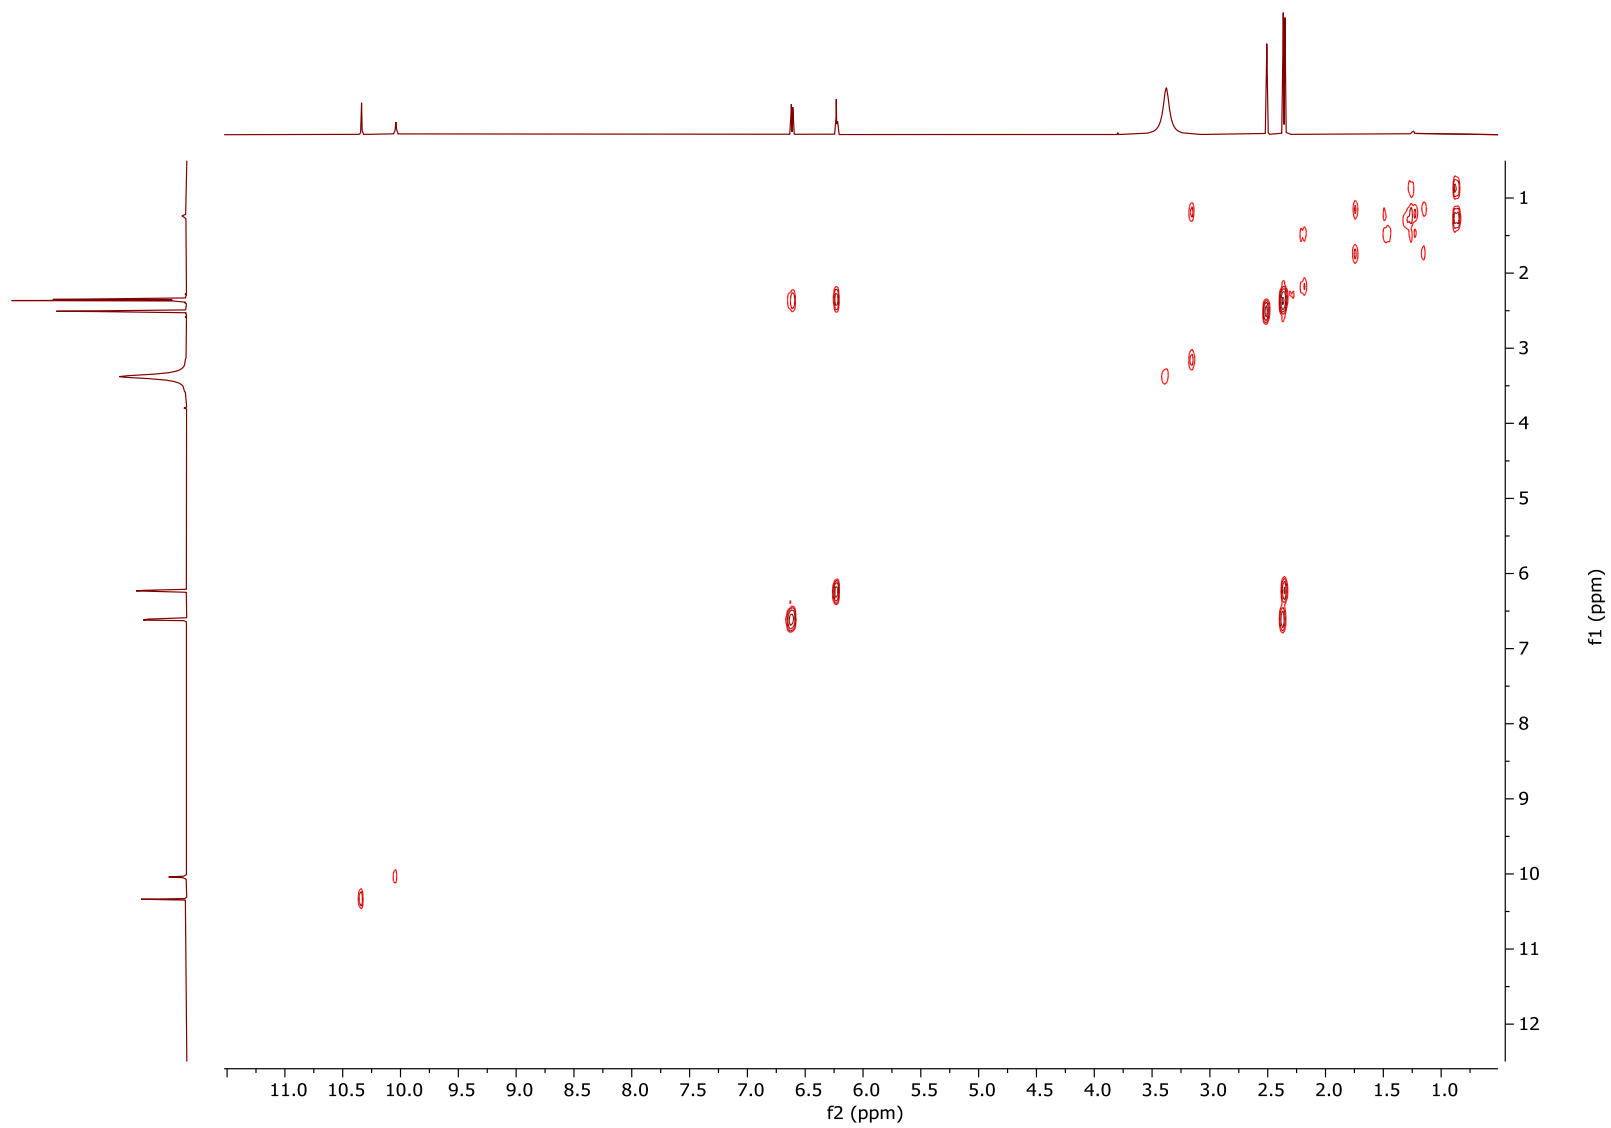

ROESY spectrum of lecanoric acid (**1**) in DMSO- $d_6$

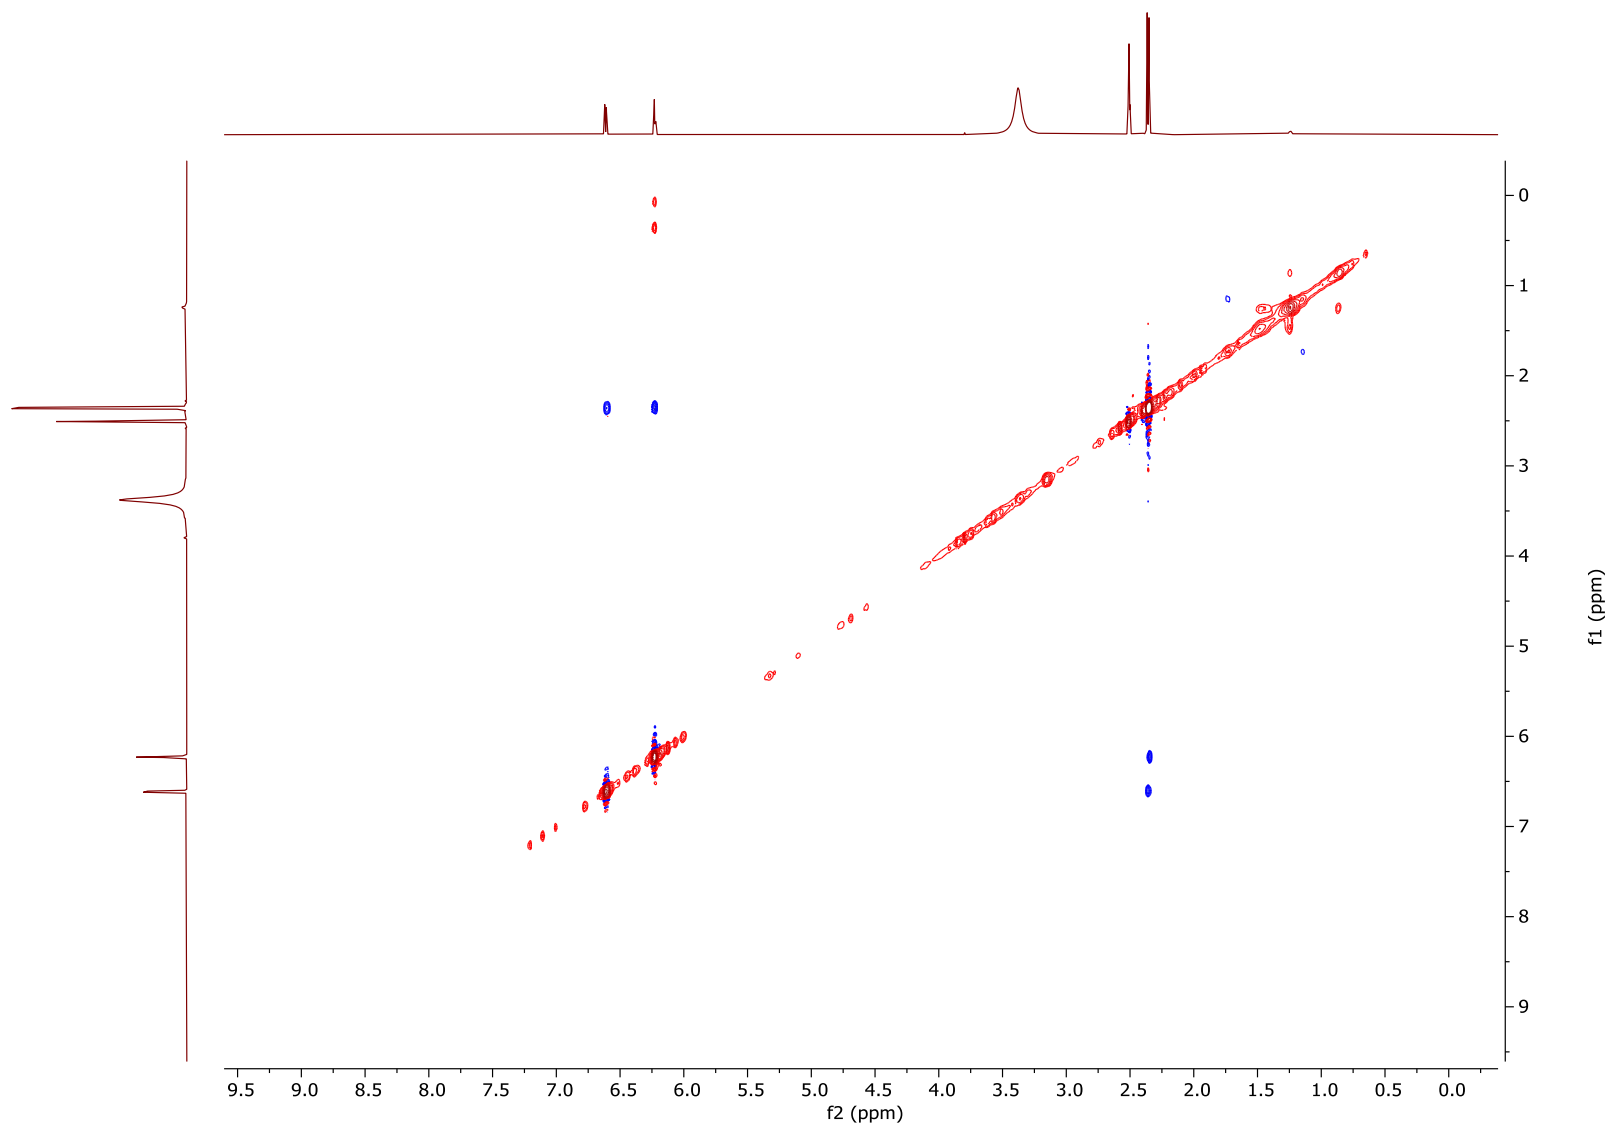

NMR data table for lecanoric acid (**1**) in DMSO- $d_6^a$

| Position | $\delta_H$ (mult., $J$ in Hz) | $\delta_C$ , type     | COSY                  | HMBC                                      | ROESY |
|----------|-------------------------------|-----------------------|-----------------------|-------------------------------------------|-------|
| 1        |                               | 108.4, C              |                       |                                           |       |
| 2        |                               | 160.1, C              |                       |                                           |       |
| 2-OH     | 10.34 (s)                     |                       |                       | 1,2,3,4,5                                 |       |
| 3        | 6.23 (d, 2.3)                 | 100.5, CH             | 5,6-Me <sup>w</sup>   | 1,2,4,5,6-Me                              |       |
| 4        |                               | 161.1, C              |                       |                                           |       |
| 4-OH     | 10.04 (brs)                   |                       |                       |                                           |       |
| 5        | 6.22 (dq, 2.3, 0.7)           | 109.9, CH             | 3,6-Me                | 1,2,3,4,6-Me                              | 6-Me  |
| 6        |                               | 140.3, C              |                       |                                           |       |
| 6-Me     | 2.35 (s)                      | 21.4, CH <sub>3</sub> | 3 <sup>w</sup> ,5     | 1,2 <sup>w</sup> ,5,6,7 <sup>w</sup>      | 5     |
| 7        |                               | 167.2, C              |                       |                                           |       |
| 1'       |                               | 116.7, C              |                       |                                           |       |
| 2'       |                               | 158.7, C              |                       |                                           |       |
| 2'-OH    | b                             |                       |                       |                                           |       |
| 3'       | 6.62 (d, 2.3)                 | 107.4, CH             | 5',6'-Me <sup>w</sup> | 1',2',4',5'                               |       |
| 4'       |                               | 152.3, C              |                       |                                           |       |
| 5'       | 6.60 (dq, 2.3, 0.7)           | 114.8, CH             | 3',6'-Me              | 1',3',4',6'-Me                            | 6'-Me |
| 6'       |                               | 139.5, C              |                       |                                           |       |
| 6'-Me    | 2.37 (s)                      | 21.0, CH <sub>3</sub> | 3' <sup>w</sup> ,5'   | 1',2' <sup>w</sup> ,5',6',7' <sup>w</sup> | 5'    |
| 7'       |                               | 170.6, C              |                       |                                           |       |
| 7'-OH    | b                             |                       |                       |                                           |       |

<sup>a</sup> Spectra recorded at 25 °C (500 MHz for <sup>1</sup>H NMR and 125 MHz for <sup>13</sup>C NMR); <sup>b</sup> Not observed; <sup>w</sup> Weak correlation.

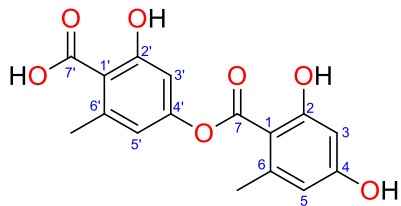

<sup>1</sup>H NMR spectrum of divaricatic acid (**2**) in DMSO-d<sub>6</sub>

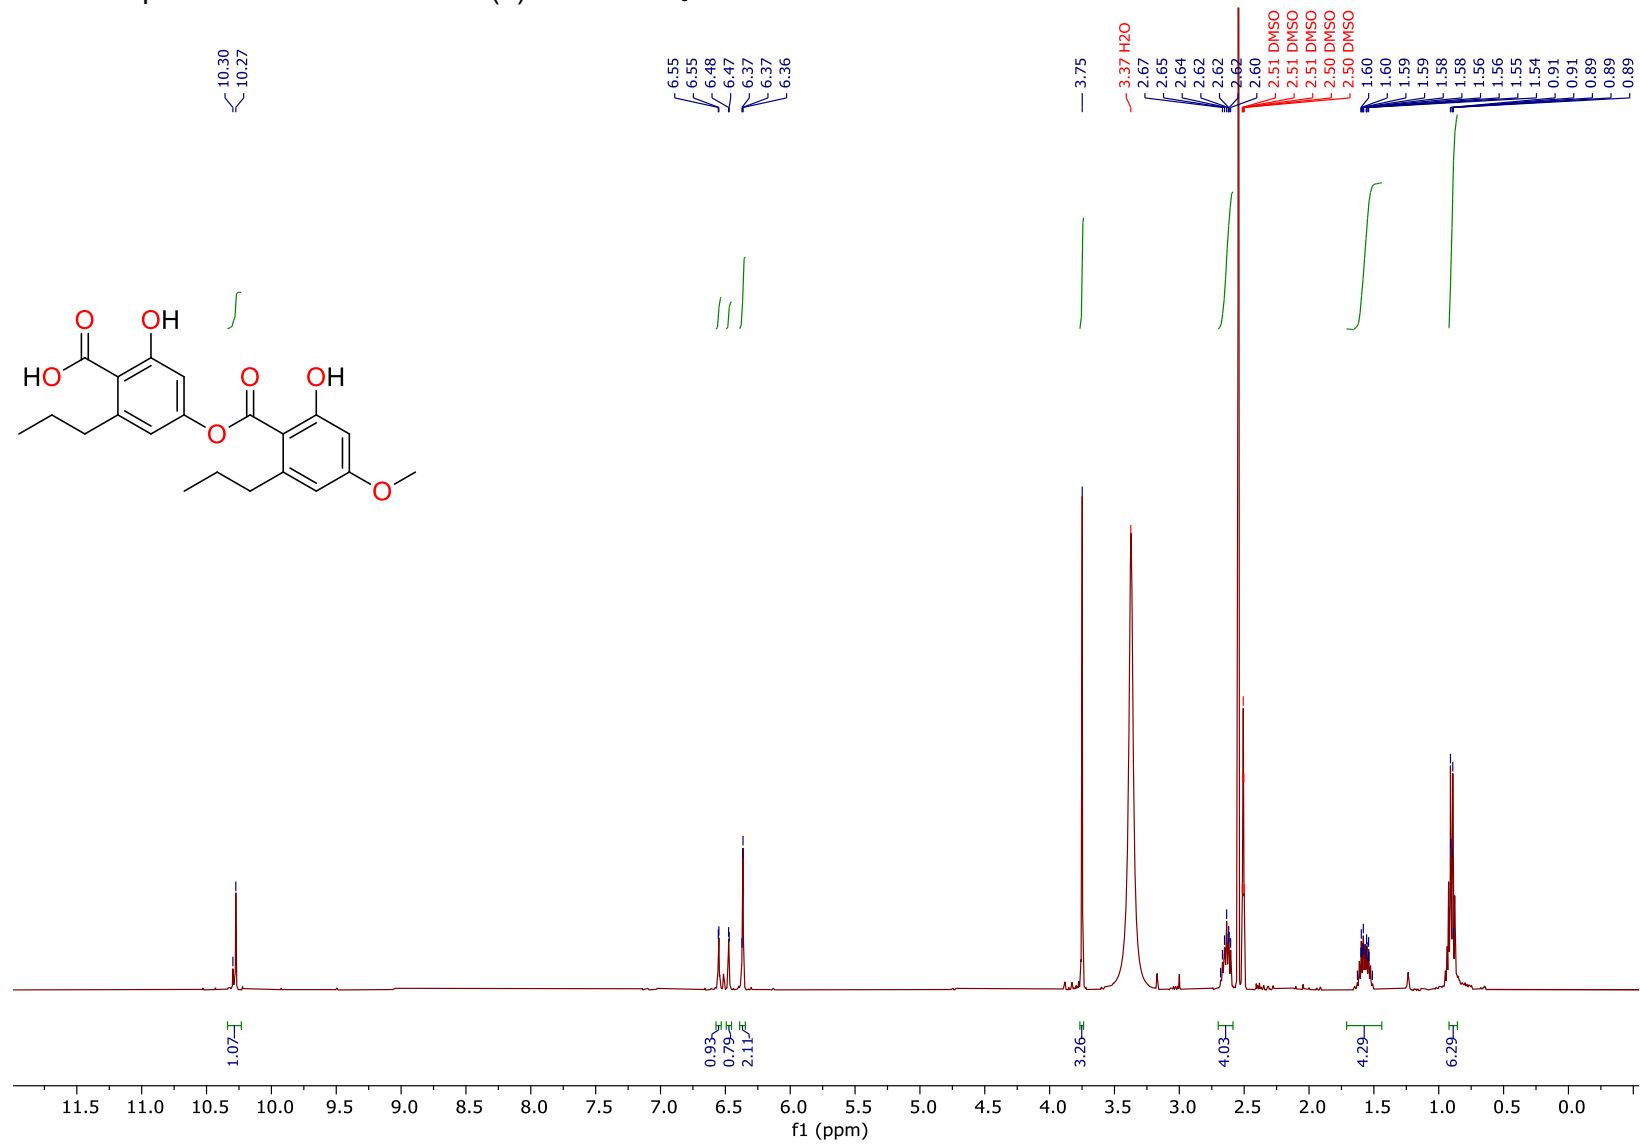

<sup>13</sup>C NMR spectrum of divaricatic acid (2) in DMSO-d<sub>6</sub>

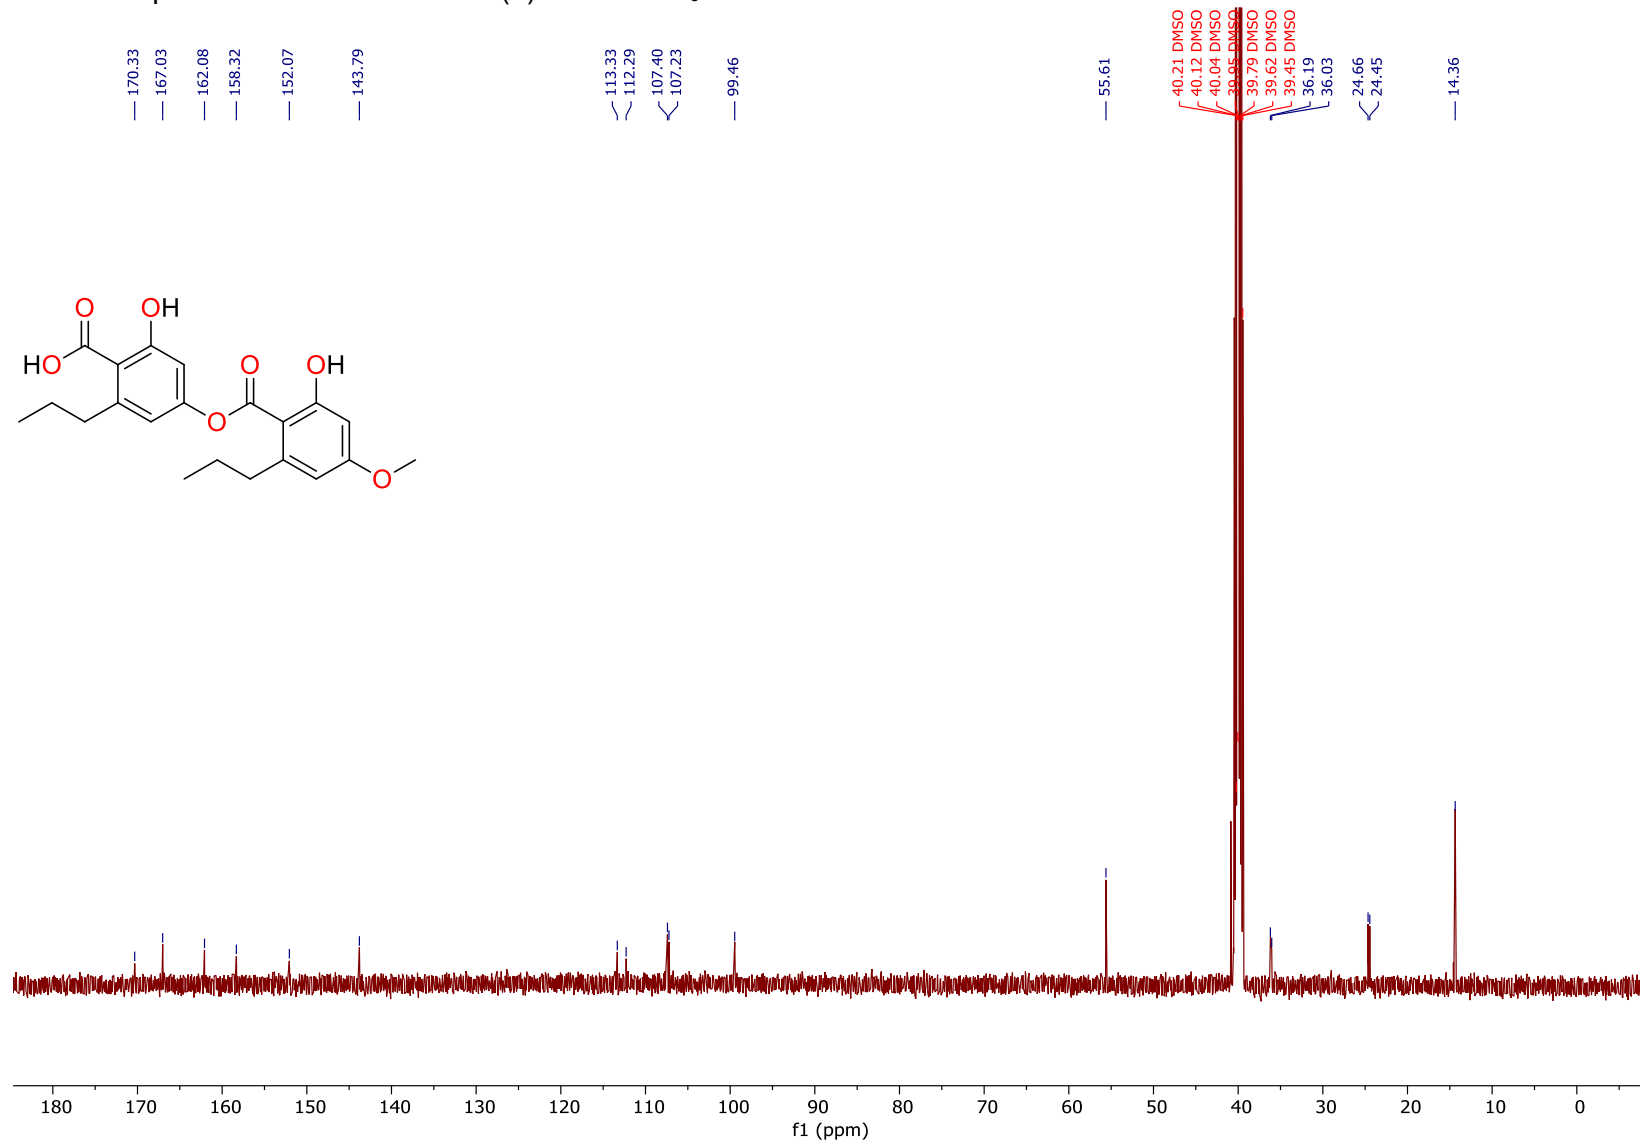

NMR data table for divaricatic acid (**2**) in DMSO- $d_6^a$

| Position | $\delta_H$ (mult., $J$ in Hz) | $\delta_C$ , type     |
|----------|-------------------------------|-----------------------|
| 1        |                               | 107.2, C              |
| 2        |                               | <sup>b</sup>          |
| 2-OH     | 10.30 (s)                     |                       |
| 3        | 6.47 (d, 2.2)                 | 99.5, CH              |
| 4        |                               | 152.1, C              |
| 4-OMe    | 3.75 (s)                      | 55.6, CH <sub>3</sub> |
| 5        | 6.55 (d, 2.2)                 | 113.3, CH             |
| 6        |                               | <sup>b</sup>          |
| 7        |                               | 167.0, C              |
| 1'       |                               | 112.3, C              |
| 2'       |                               | 158.3, C              |
| 2'-OH    | 10.27 (s)                     |                       |
| 3'       | 6.36 (d, 2.4)                 | 107.4, CH             |
| 4'       |                               | 162.1, C              |
| 5'       | 6.37 (d, 2.4)                 | <sup>b</sup>          |
| 6'       |                               | 143.8, C              |
| 7'       |                               | 170.3, C              |
| 1''      | 2.60 (t, 7.8)                 | 36.0, CH <sub>2</sub> |
| 2''      | 1.51–1.63 (m)                 | 24.5, CH <sub>2</sub> |
| 3''      | 0.89 (t, 7.3)                 | 14.4, CH <sub>3</sub> |
| 1'''     | 2.64 (t, 7.8)                 | 36.2, CH <sub>2</sub> |
| 2'''     | 1.51–1.63 (m)                 | 24.7, CH <sub>2</sub> |
| 3'''     | 0.91 (t, 7.3)                 | 14.4, CH <sub>3</sub> |

<sup>a</sup> Spectra recorded at 25 °C (500 MHz for <sup>1</sup>H NMR and 125 MHz for <sup>13</sup>C NMR); <sup>b</sup> Not observed.

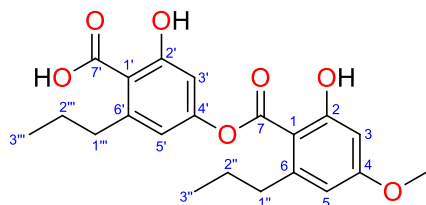

$^1\text{H}$  NMR spectrum of orcinol (**3**) in  $\text{CD}_3\text{OD}$

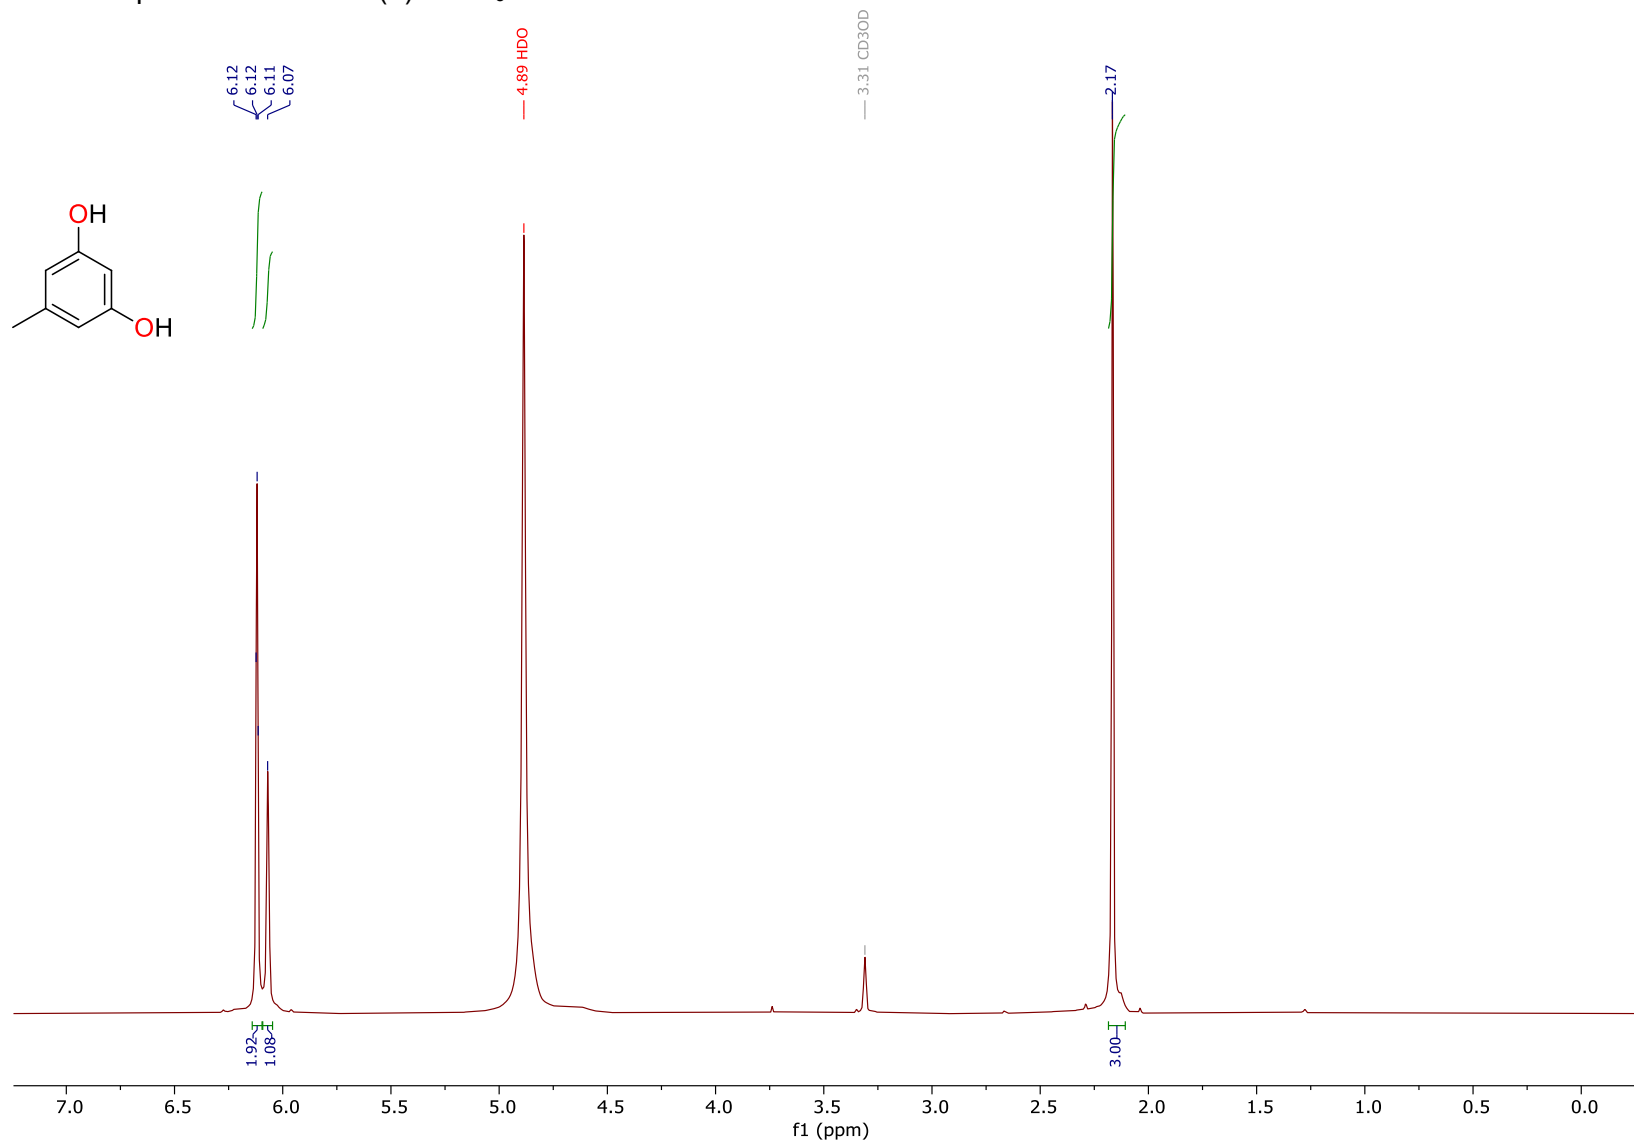

<sup>13</sup>C NMR spectrum of orcinol (**3**) in CD<sub>3</sub>OD

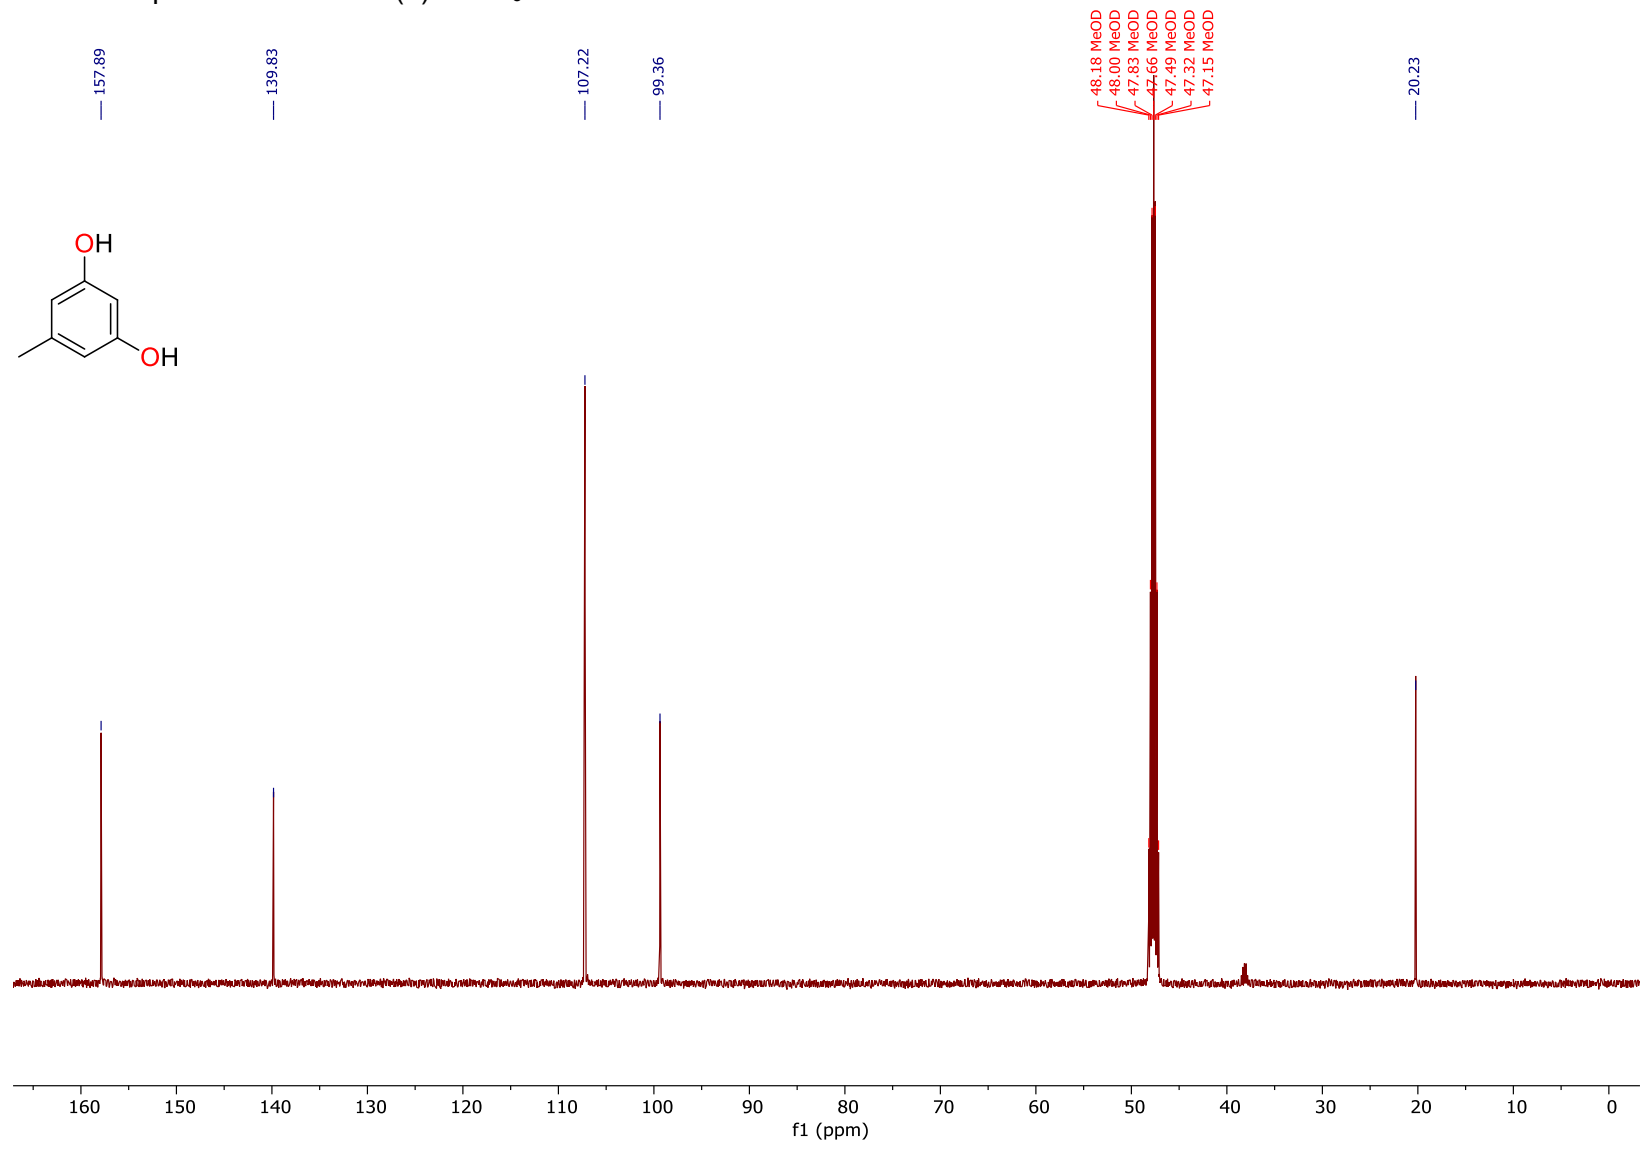

NMR data table for orcinol (**3**) in CD<sub>3</sub>OD<sup>a</sup>

| Position | $\delta_{\text{H}}$ (mult., <i>J</i> in Hz) | $\delta_{\text{C}}$ , type |
|----------|---------------------------------------------|----------------------------|
| 1        | 6.12, d (2.4)                               | 107.2, CH                  |
| 2        |                                             | 157.9, C                   |
| 2-OH     |                                             |                            |
| 3        | 6.07, t (2.3)                               | 99.4, CH                   |
| 4        |                                             | 157.9, C                   |
| 4-OH     |                                             |                            |
| 5        | 6.12, d (2.4)                               | 107.2, CH                  |
| 6        |                                             | 139.8, C                   |
| 6-Me     | 2.17 (s)                                    | 20.2, CH <sub>3</sub>      |

<sup>a</sup> Spectra recorded at 25 °C (500 MHz for <sup>1</sup>H NMR and 125 MHz for <sup>13</sup>C NMR).

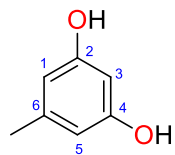

<sup>1</sup>H NMR spectrum of orsellinic acid (**4**) in DMSO-*d*<sub>6</sub>

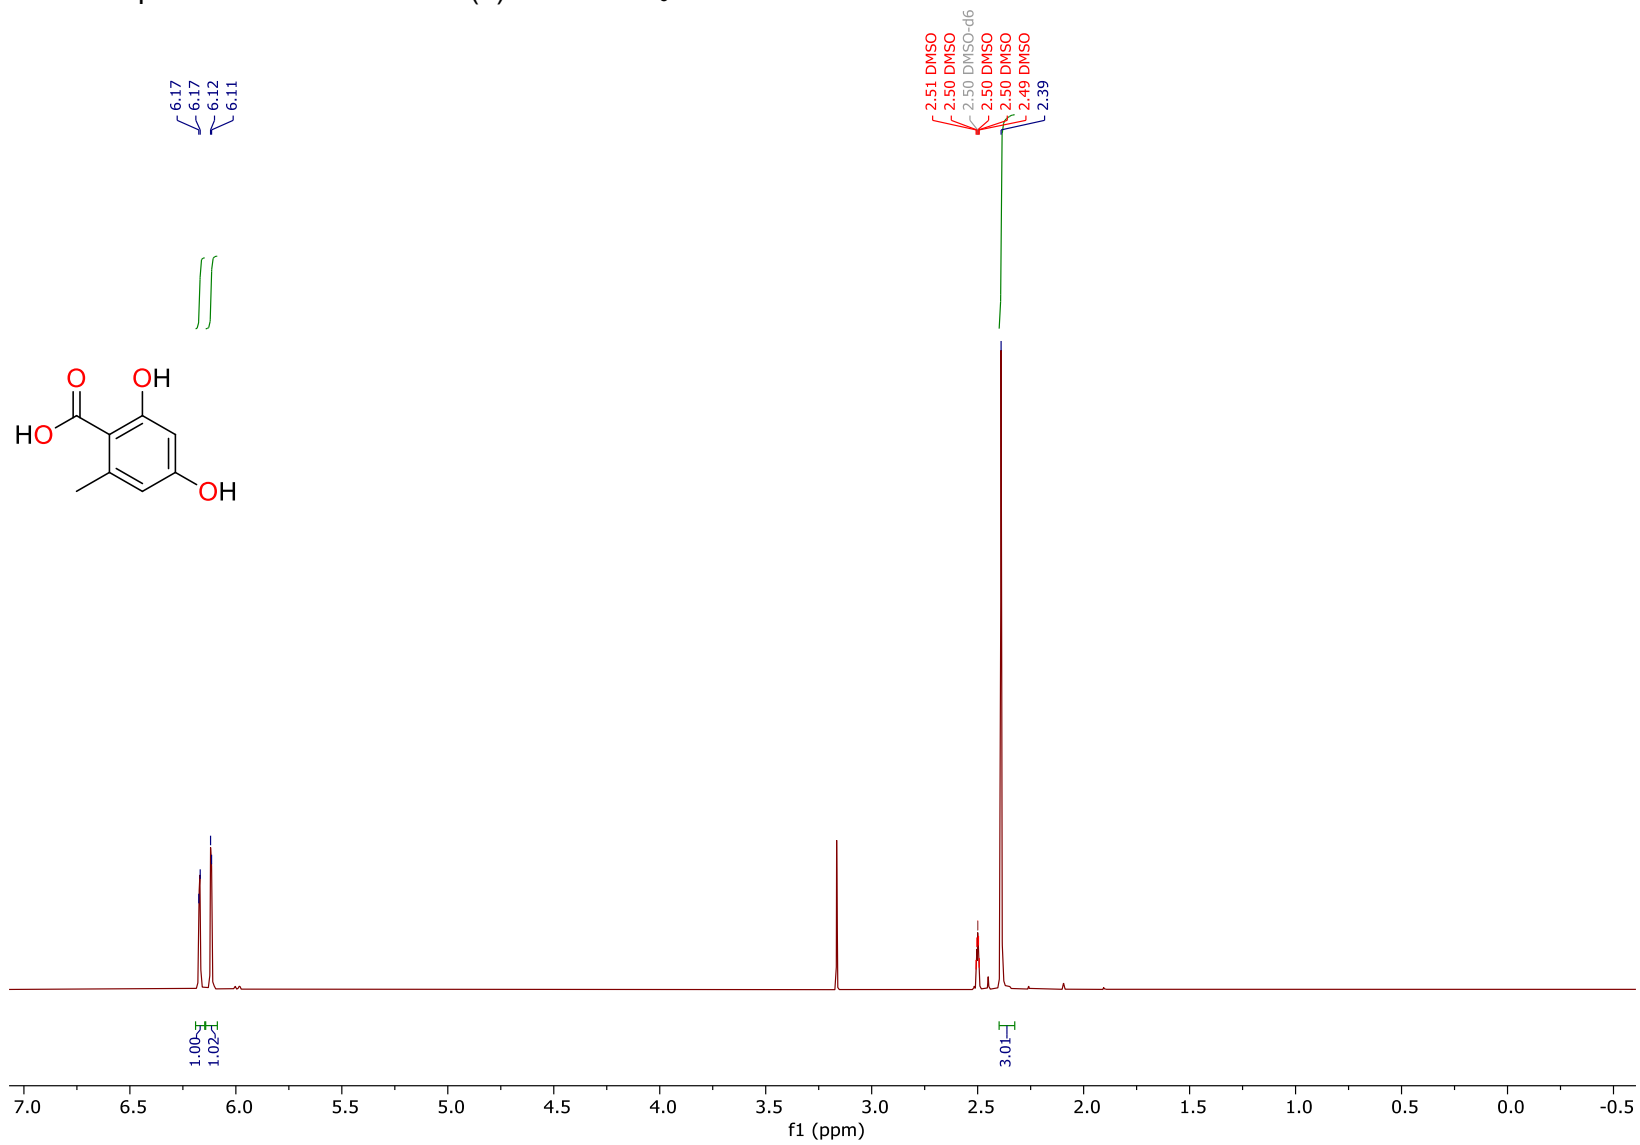

<sup>13</sup>C NMR spectrum of orsellinic acid (**4**) in DMSO-d<sub>6</sub>

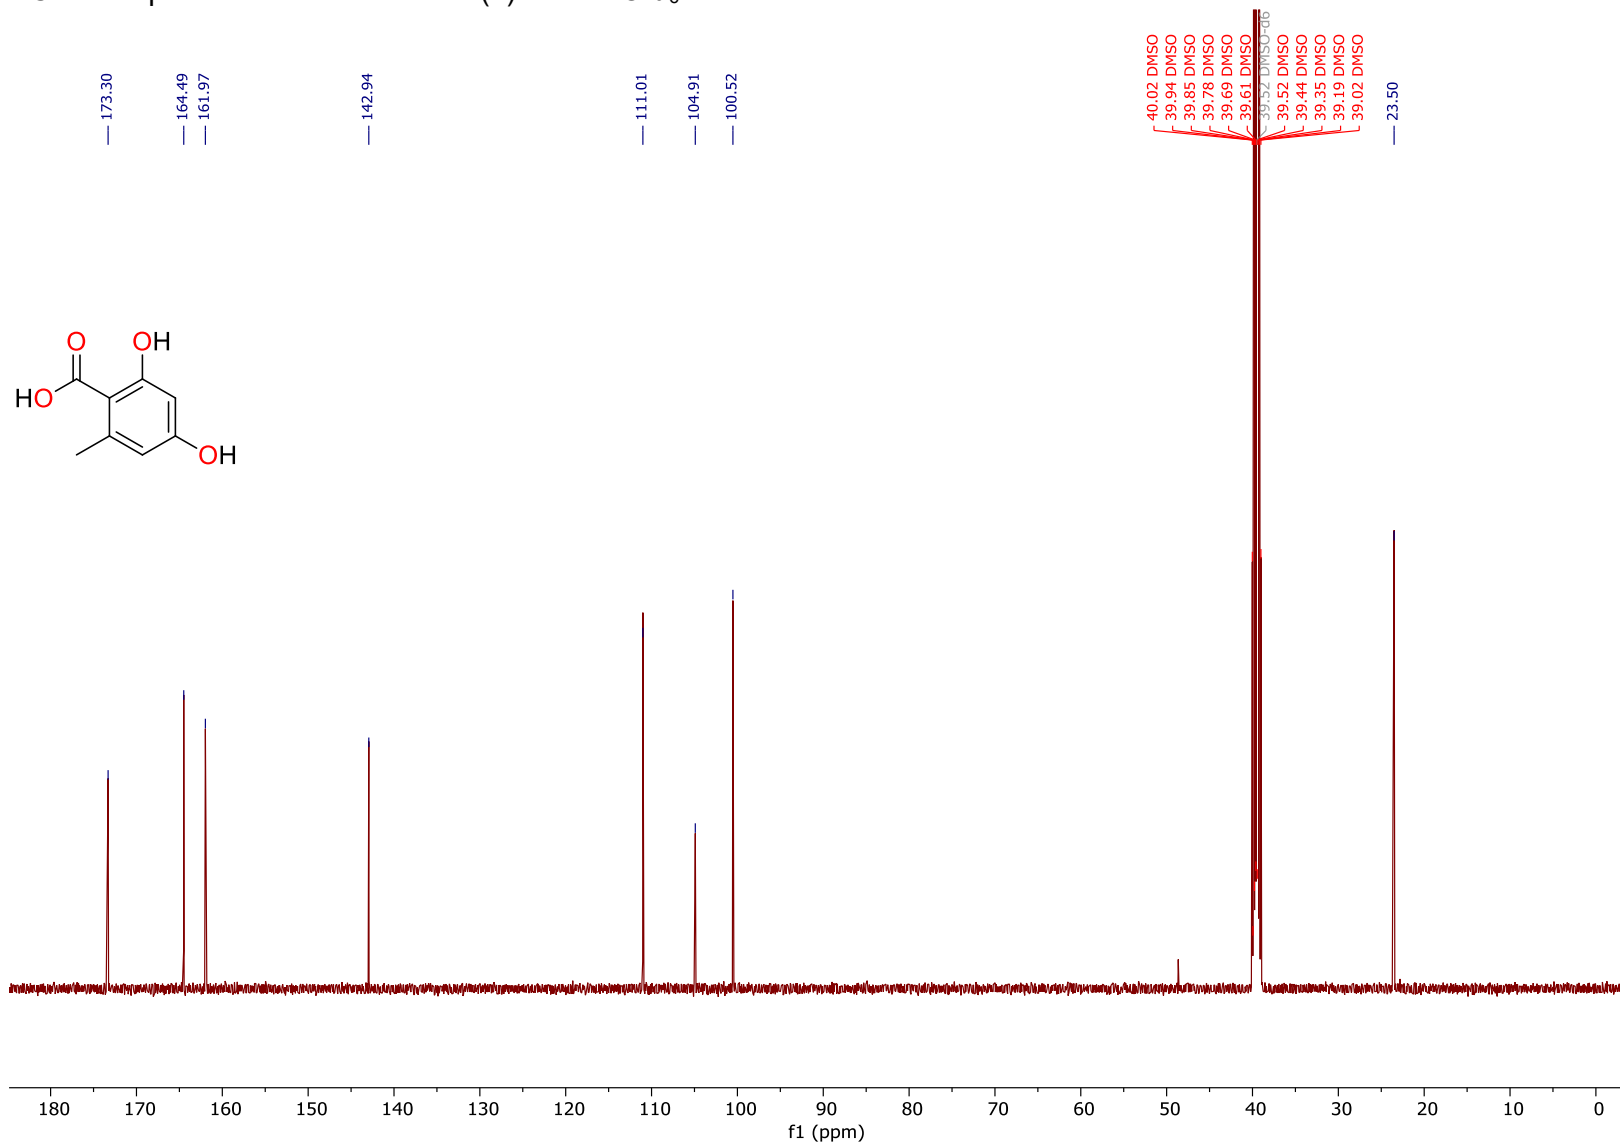

NMR data table for orsellinic acid (**4**) in DMSO- $d_6^a$

| Position | $\delta_H$ (mult., $J$ in Hz) | $\delta_C$ , type     |
|----------|-------------------------------|-----------------------|
| 1        |                               | 104.9, C              |
| 2        |                               | 162.0, C              |
| 2-OH     | b                             |                       |
| 3        | 6.17 (d, 2.4)                 | 100.5, CH             |
| 4        |                               | 164.5, C              |
| 4-OH     | b                             |                       |
| 5        | 6.12 (d, 2.4)                 | 111.0, CH             |
| 6        |                               | 142.9, C              |
| 6-Me     | 2.39 (s)                      | 23.5, CH <sub>3</sub> |
| 7        |                               | 173.3, C              |
| 7-OH     | b                             |                       |

<sup>a</sup> Spectra recorded at 25 °C (500 MHz for <sup>1</sup>H NMR and 125 MHz for <sup>13</sup>C NMR); <sup>b</sup> Not observed.

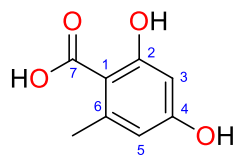

$^1\text{H}$  NMR spectrum of methyl orsellinate (**5**) in  $\text{CDCl}_3$

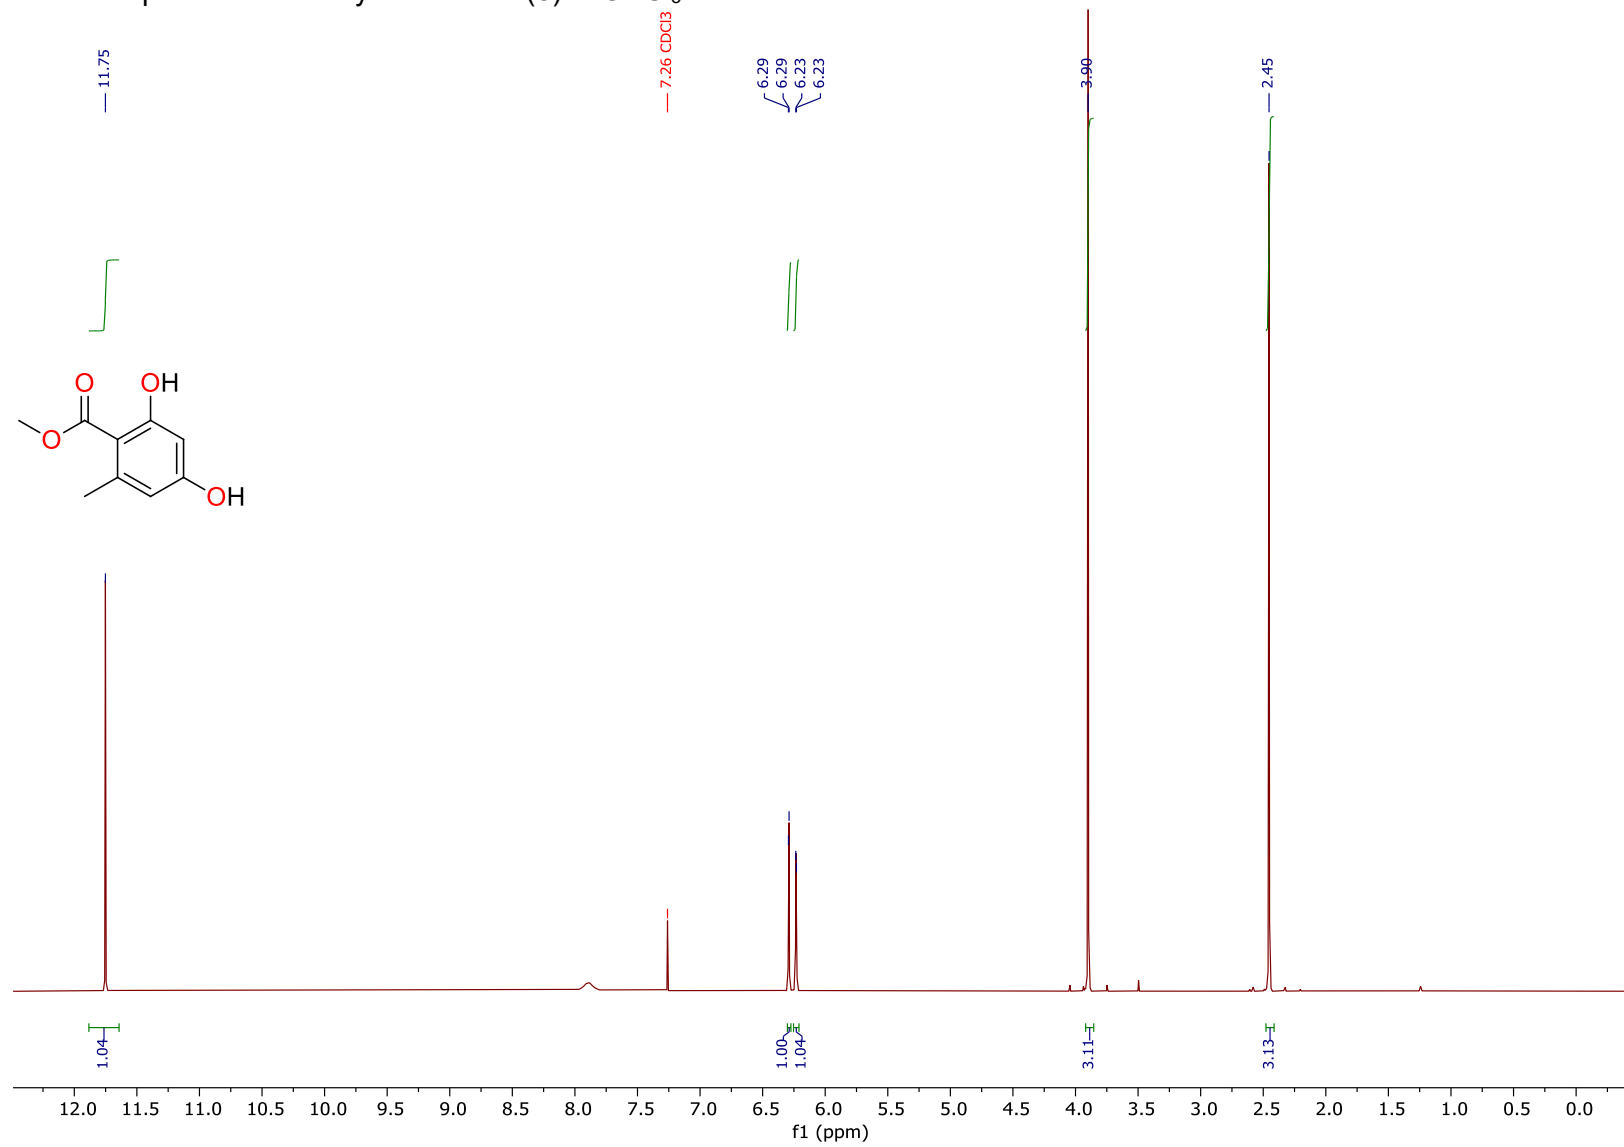

<sup>13</sup>C NMR spectrum of methyl orsellinate (**5**) in CDCl<sub>3</sub>

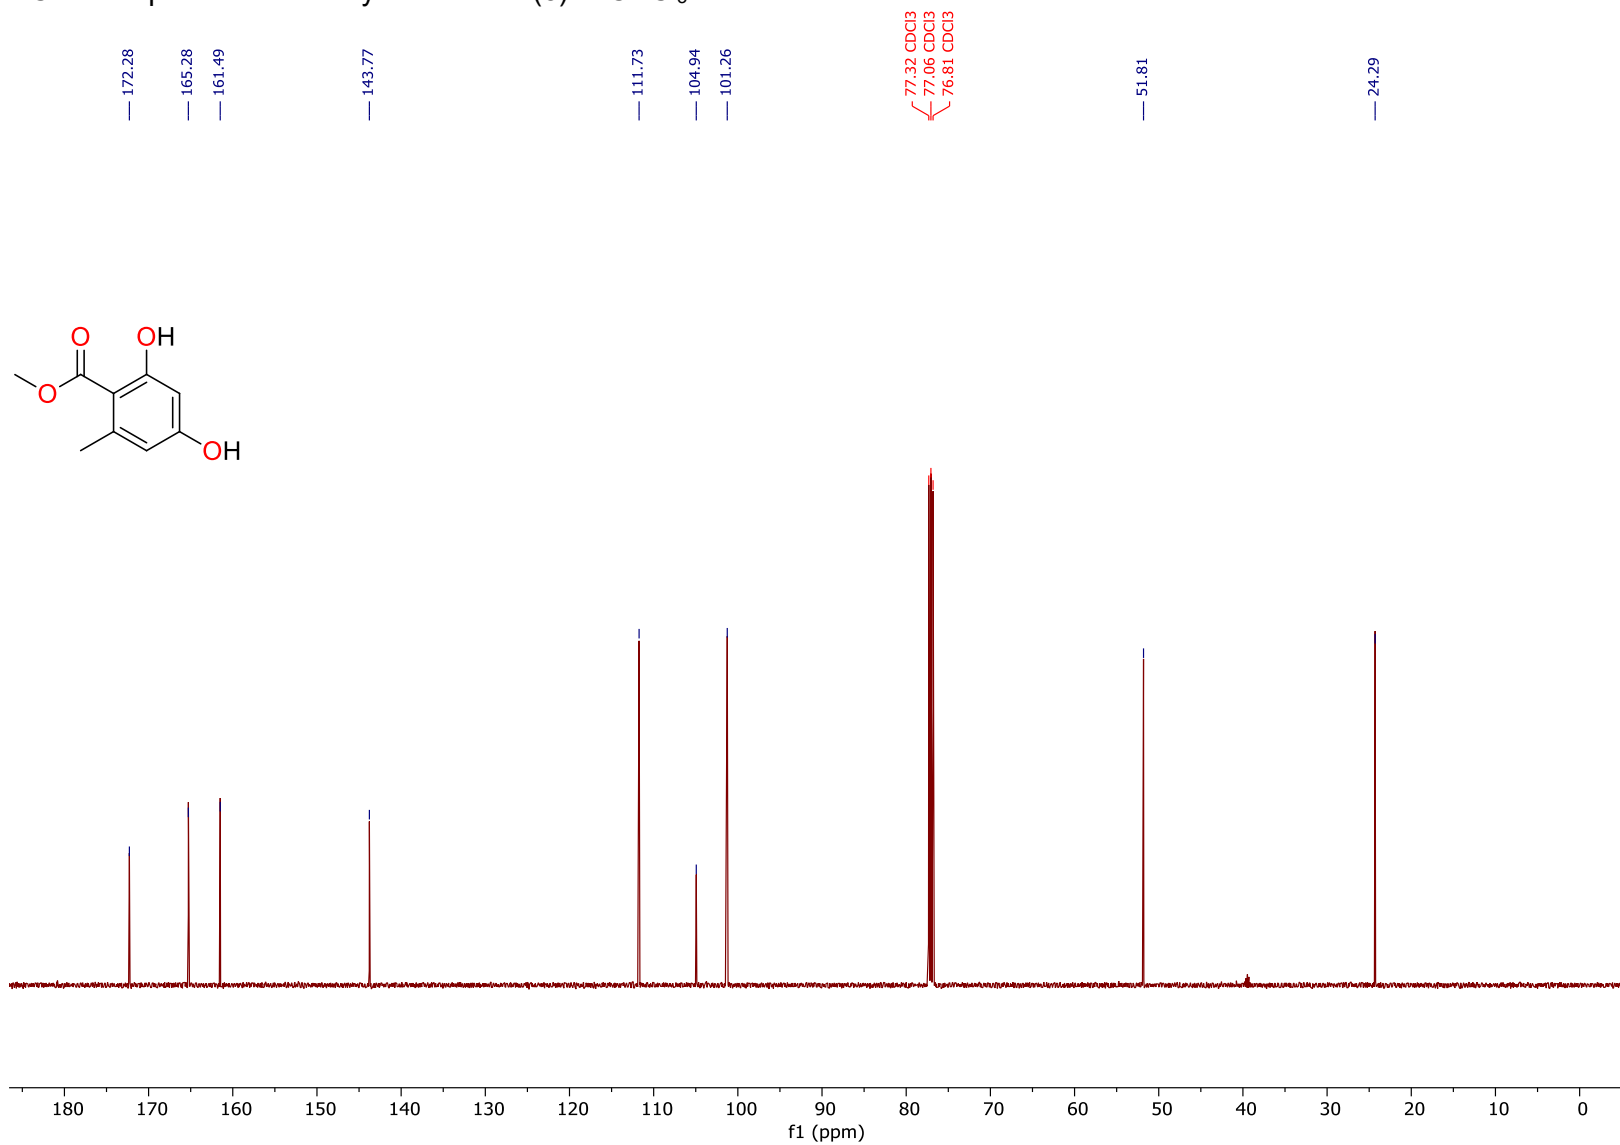

NMR data table for methyl orsellinate (**5**) in CDCl<sub>3</sub><sup>a</sup>

| Position | $\delta_H$ (mult., <i>J</i> in Hz) | $\delta_C$ , type     |
|----------|------------------------------------|-----------------------|
| 1        |                                    | 101.3, C              |
| 2        |                                    | 161.5, C              |
| 2-OH     | 11.75 (s)                          |                       |
| 3        | 6.29 (d, 2.5)                      | 104.9, CH             |
| 4        |                                    | 165.3, C              |
| 4-OH     | <sup>b</sup>                       |                       |
| 5        | 6.23 (d, 2.5)                      | 111.7, CH             |
| 6        |                                    | 143.8, C              |
| 6-Me     | 2.45 (s)                           | 24.3, CH <sub>3</sub> |
| 7        |                                    | 172.3, C              |
| 7-OMe    | 3.90 (s)                           | 51.8, CH <sub>3</sub> |

<sup>a</sup> Spectra recorded at 25 °C (500 MHz for <sup>1</sup>H NMR and 125 MHz for <sup>13</sup>C NMR); <sup>b</sup> Not observed.

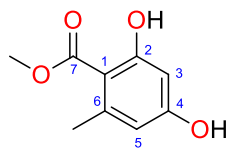

<sup>1</sup>H NMR spectrum of compound **6** in DMSO-*d*<sub>6</sub>

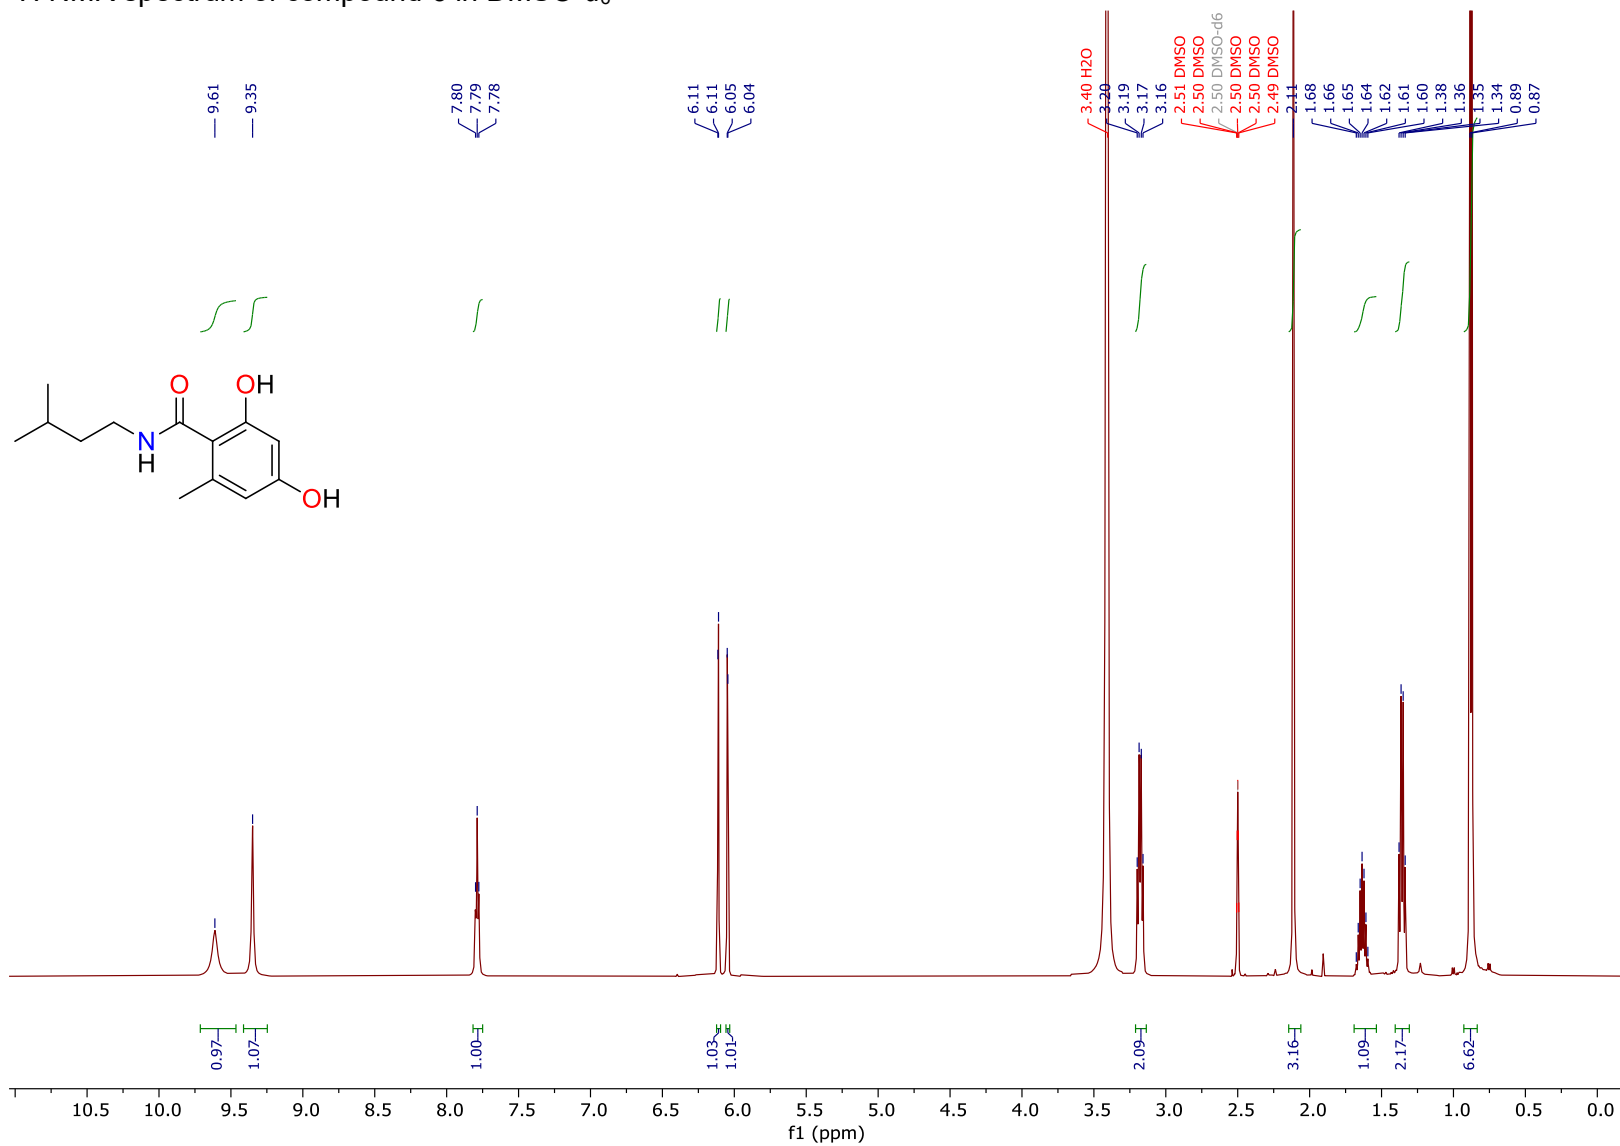

$^1\text{H}$  NMR spectrum of compound **6** in  $\text{DMSO-}d_6$  and  $\text{D}_2\text{O}$

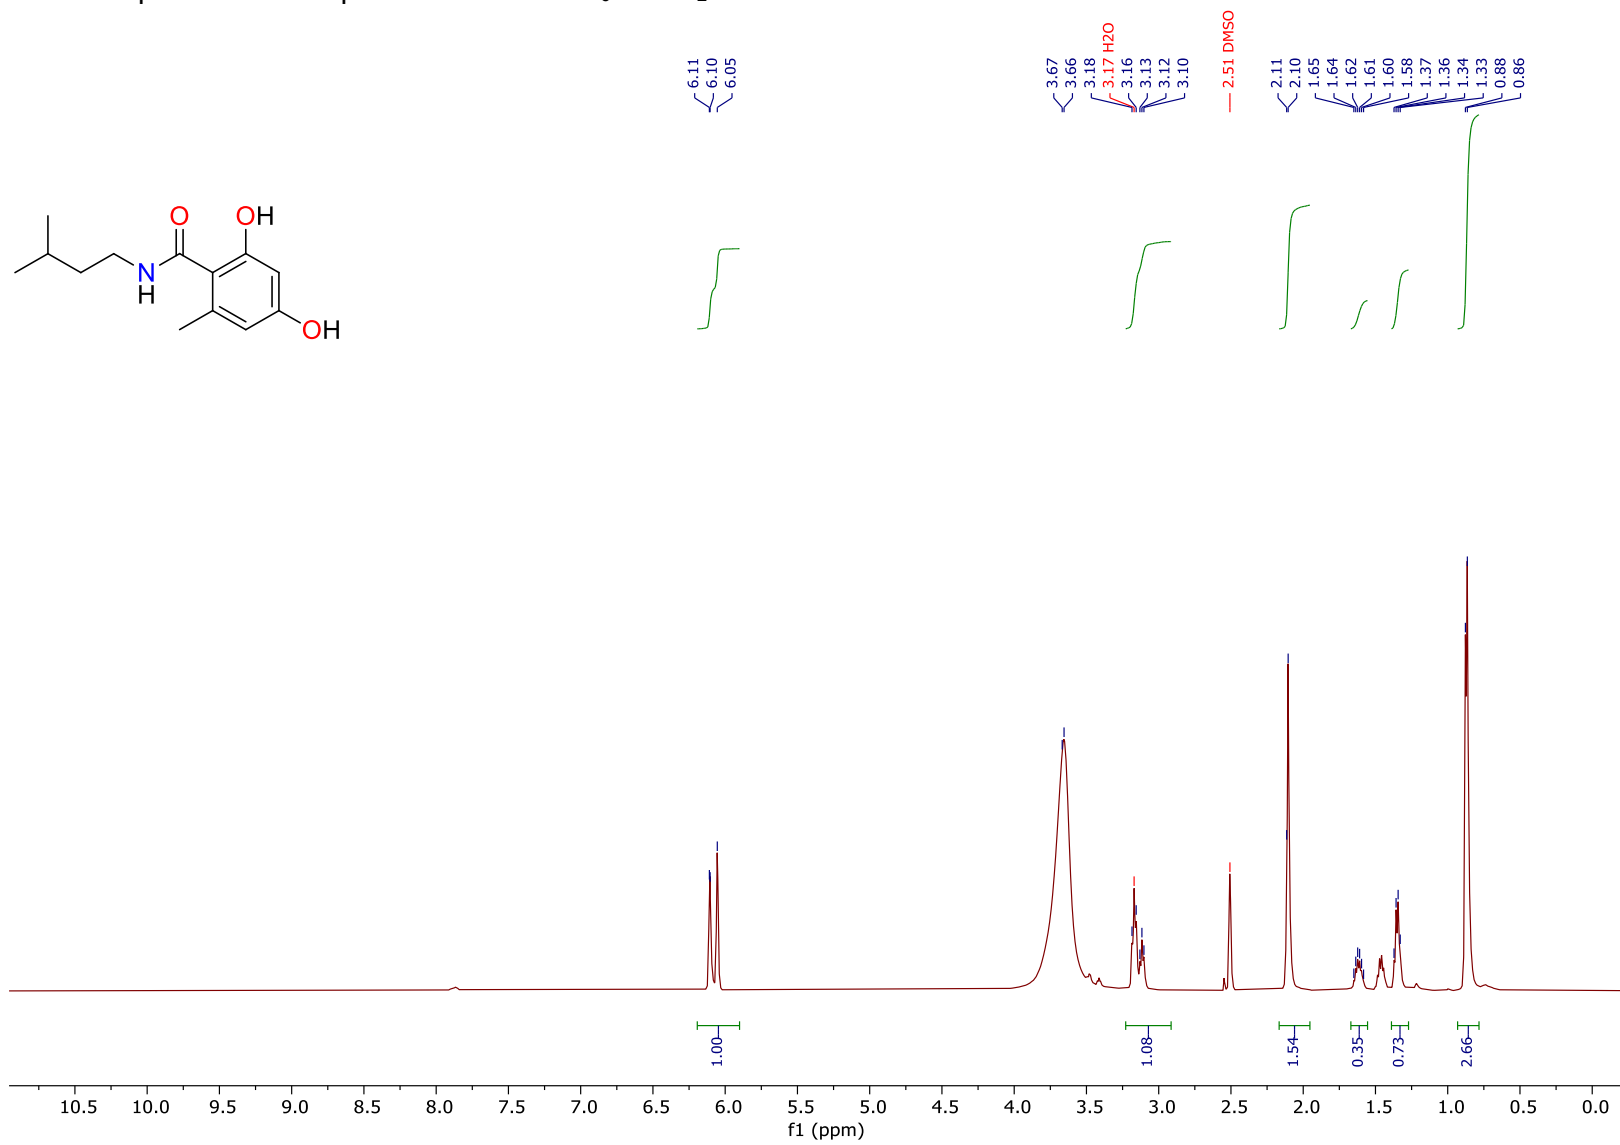

$^{13}\text{C}$  NMR spectrum of compound **6** in  $\text{DMSO-}d_6$

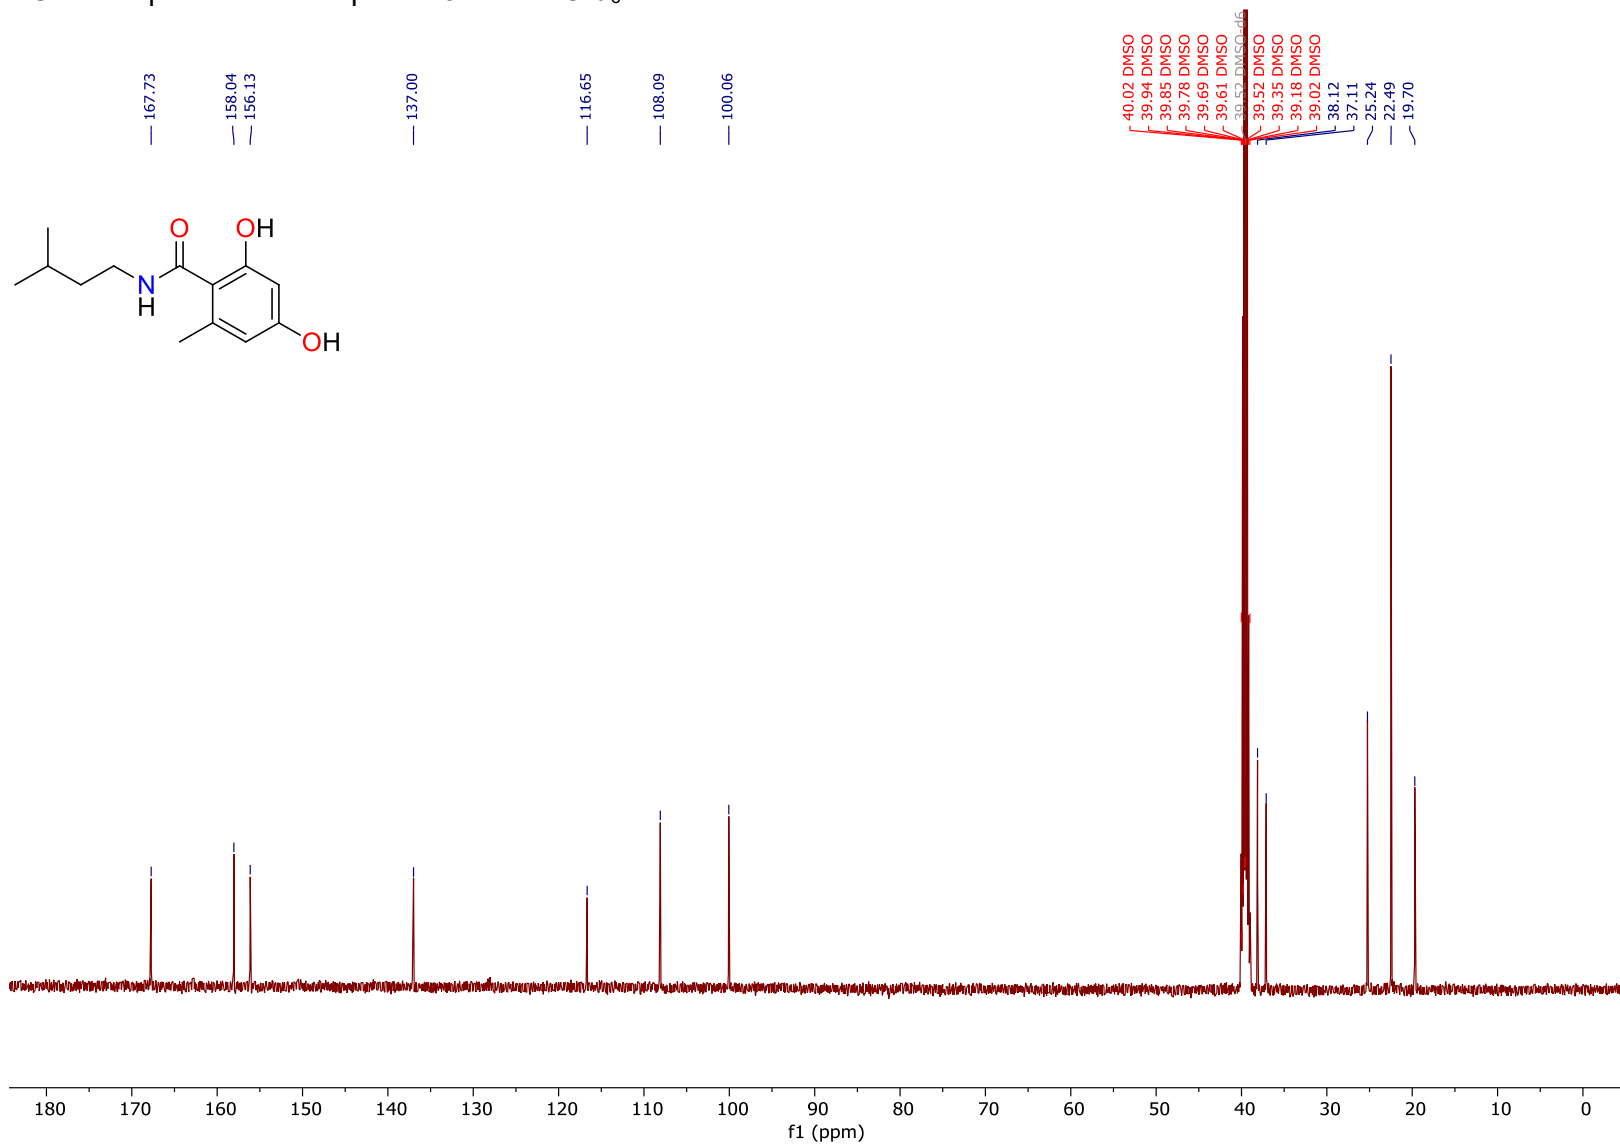

HSQC spectrum of compound **6** in DMSO- $d_6$

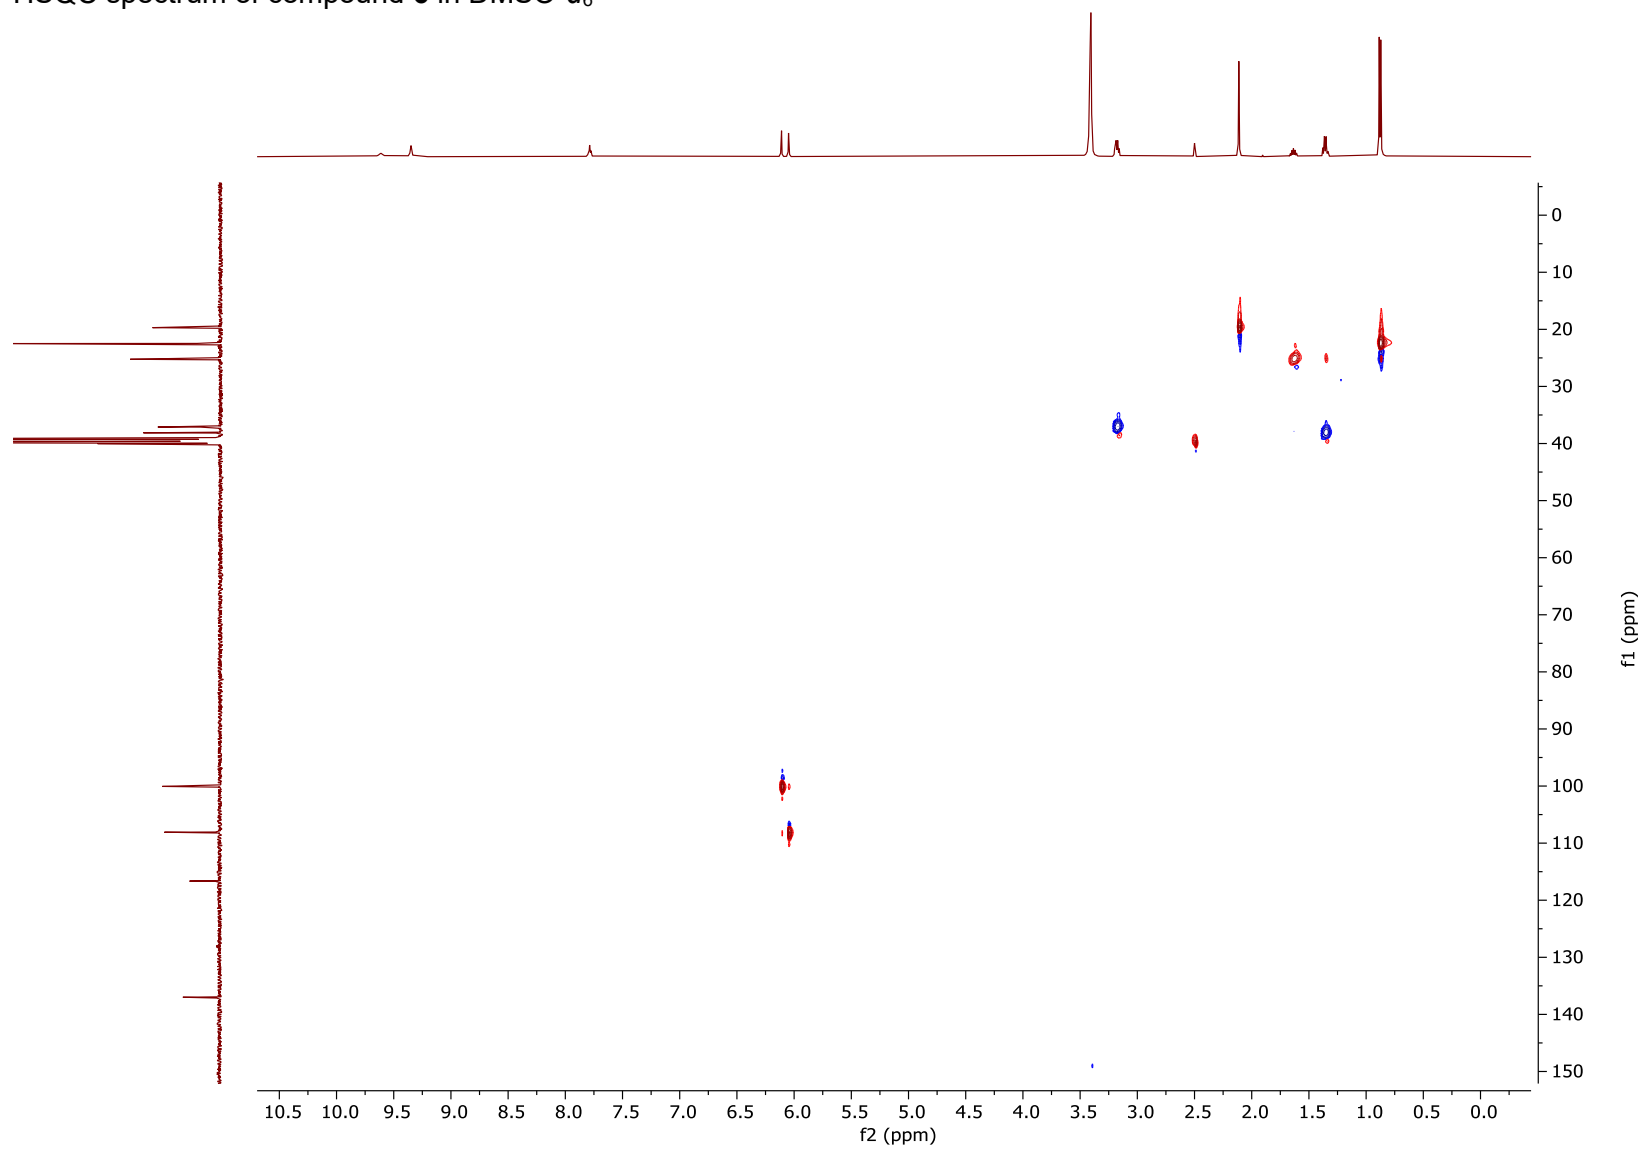

HMBC spectrum of compound **6** in DMSO-*d*<sub>6</sub>

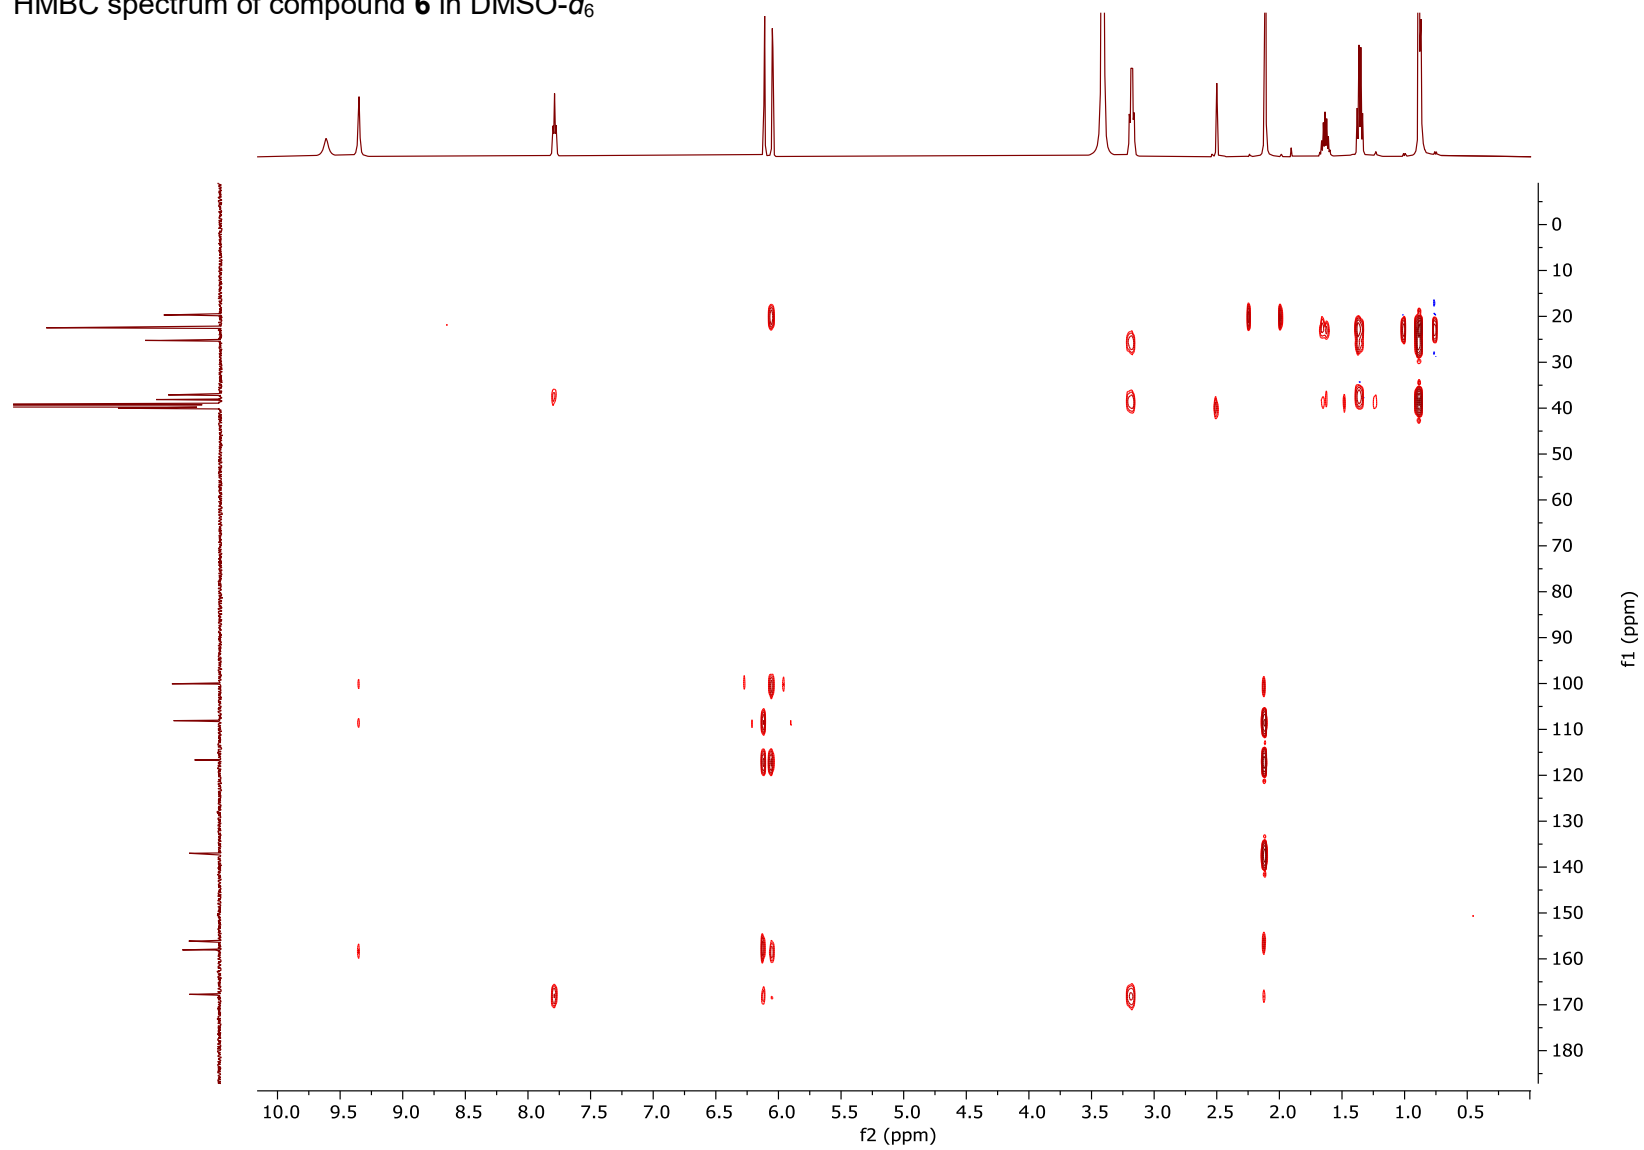

COSY spectrum of compound **6** in DMSO- $d_6$

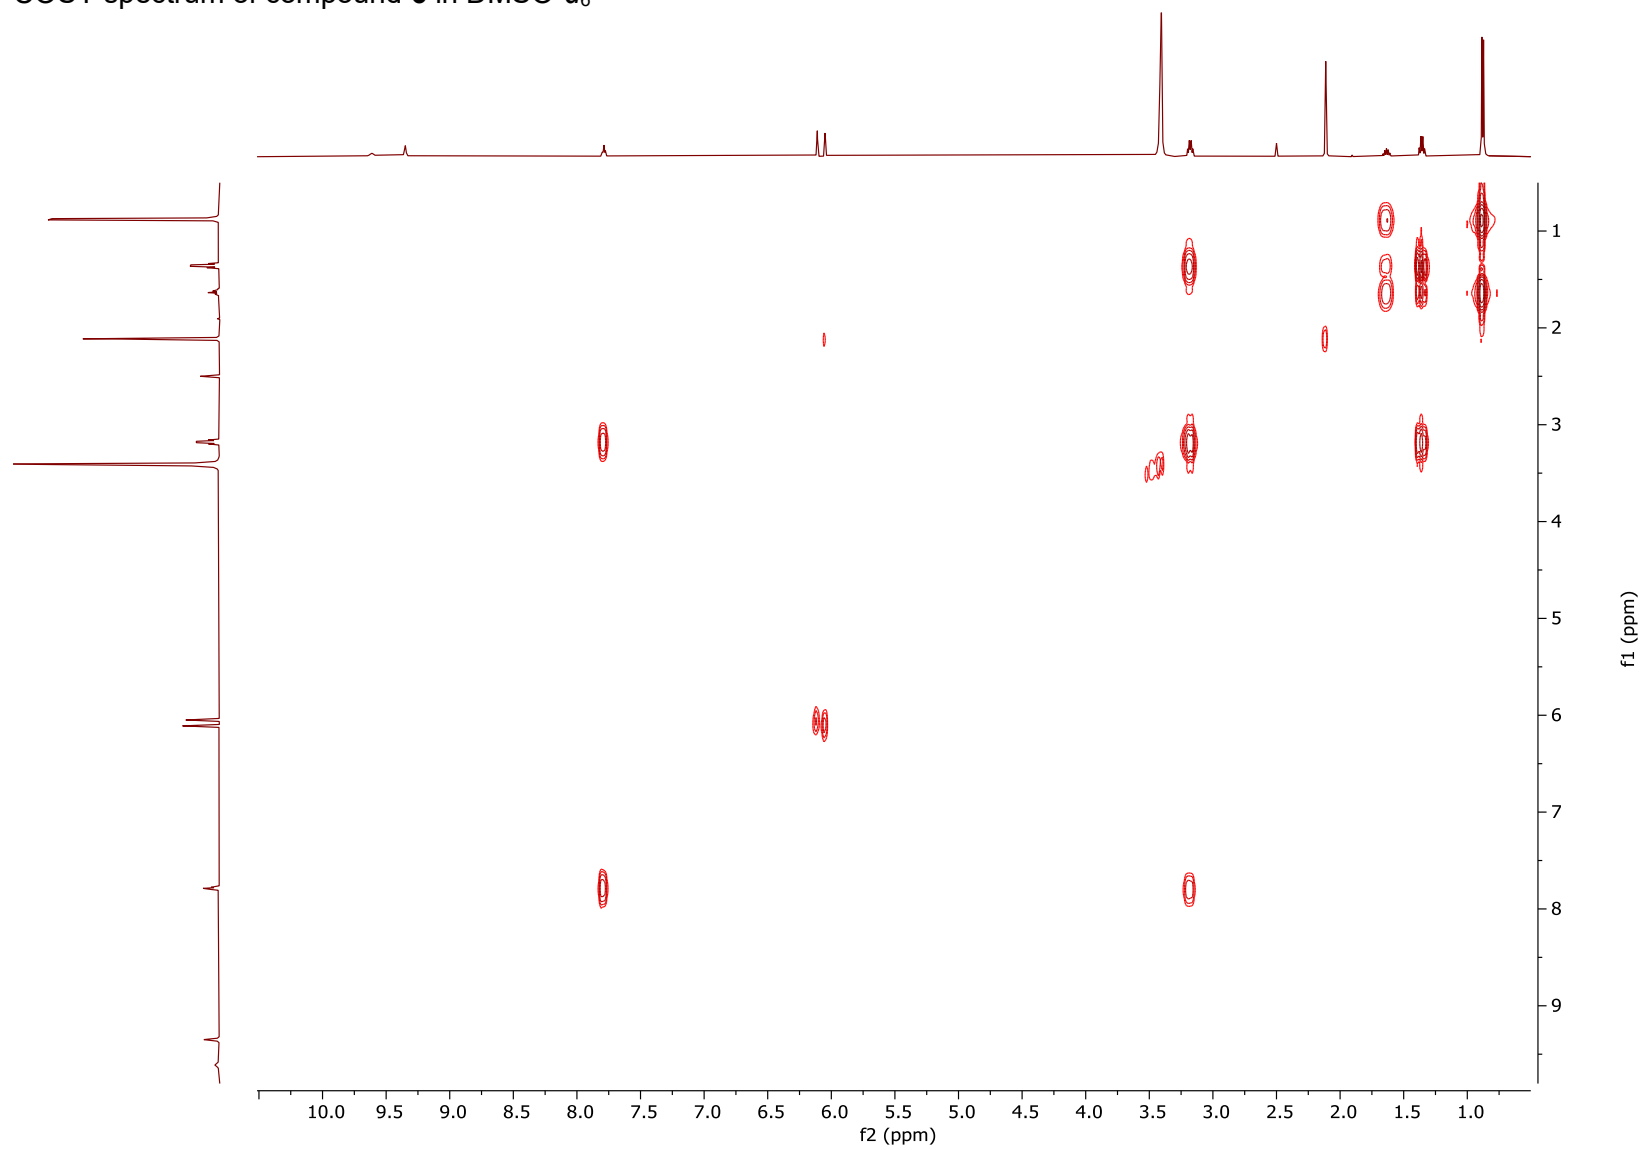

ROESY spectrum of compound **6** in DMSO- $d_6$

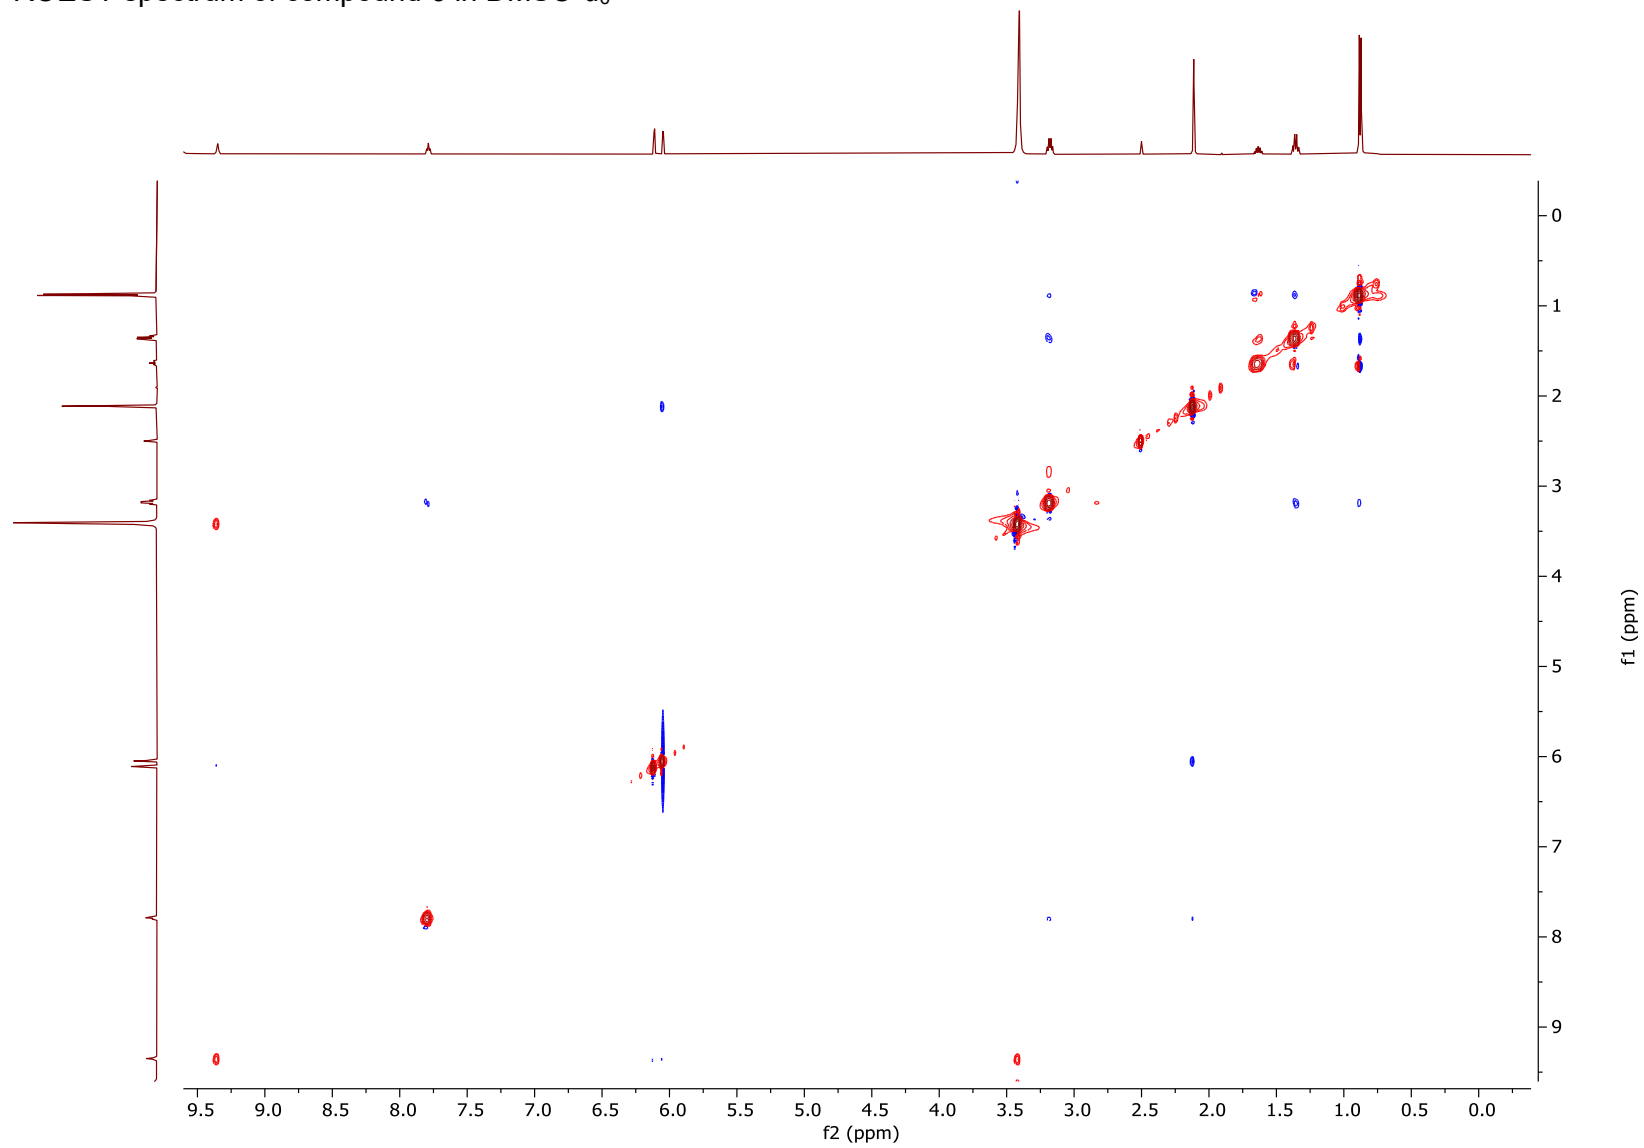

NMR data table for compound **6** in DMSO-*d*<sub>6</sub><sup>a</sup>

| Position | $\delta_{\text{H}}$ (mult., <i>J</i> in Hz) | $\delta_{\text{C}}$ , type | COSY                           | HMBC                                                   | ROESY        |
|----------|---------------------------------------------|----------------------------|--------------------------------|--------------------------------------------------------|--------------|
| 1        |                                             | 116.7, C                   |                                |                                                        |              |
| 2        |                                             | 156.1, C                   |                                |                                                        |              |
| 2-OH     | 9.61 (brs)                                  |                            |                                |                                                        | 3            |
| 3        | 6.11 (d, 2.2)                               | 100.1, CH                  | 5,6-Me <sup>w</sup>            | 1,4,5,7 <sup>w</sup>                                   | 2-OH,4-OH    |
| 4        |                                             | 158.0, C                   |                                |                                                        |              |
| 4-OH     | 9.35 (brs)                                  |                            |                                | 3,4,5                                                  | 3,5          |
| 5        | 6.04 (d, 2.2)                               | 108.1, CH                  | 3,6-Me <sup>w</sup>            | 1,3,4,6-Me,7 <sup>w</sup>                              | 4-OH,6-Me    |
| 6        |                                             | 137.0, C                   |                                |                                                        |              |
| 6-Me     | 2.11 (s)                                    | 19.7, CH <sub>3</sub>      | 3 <sup>w</sup> ,5 <sup>w</sup> | 1,2 <sup>w</sup> ,3 <sup>w</sup> ,4,5,6,7 <sup>w</sup> | 5,7-NH       |
| 7        |                                             | 167.7, C                   |                                |                                                        |              |
| 7-NH     | 7.79 (t, 5.6)                               |                            | 8                              | 7,8,9                                                  | 6-Me,8,9     |
| 8        | 3.17 (dt, 5.6, 6.6)                         | 37.1, CH <sub>2</sub>      | 7-NH,9                         | 7,8,9,10                                               | 7-NH,9,11,12 |
| 9        | 1.35 (dt, 6.6, 7.1)                         | 38.1, CH <sub>2</sub>      | 8,10                           | 8,10,11,12                                             | 8,11,12      |
| 10       | 1.64 (m)                                    | 25.2, CH                   | 9,11,12                        | 9,11,12                                                | 9,11,12      |
| 11       | 0.87 (d, 6.6)                               | 22.5, CH <sub>3</sub>      | 10                             | 9,10,12                                                | 8,9,10       |
| 12       | 0.89 (d, 6.6)                               | 22.5, CH <sub>3</sub>      | 10                             | 9,10,11                                                | 8,9,10       |

<sup>a</sup>Spectra recorded at 25 °C (500 MHz for <sup>1</sup>H NMR and 125 MHz for <sup>13</sup>C NMR); <sup>w</sup>Weak correlation.

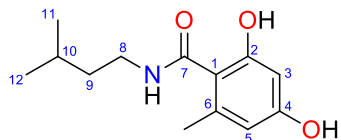

# High resolution mass spectrum of compound 6

## Mass Spectrum SmartFormula Report

### Analysis Info

Analysis Name D:\Data\Sasha\20231004\RAD915C000001.d  
Method DirectInfusion\_2018\_pos.m  
Sample Name RAD915C  
Comment

Acquisition Date 10/4/2023 1:55:33 PM

Operator Demo User  
Instrument maXis II ETD

### Acquisition Parameter

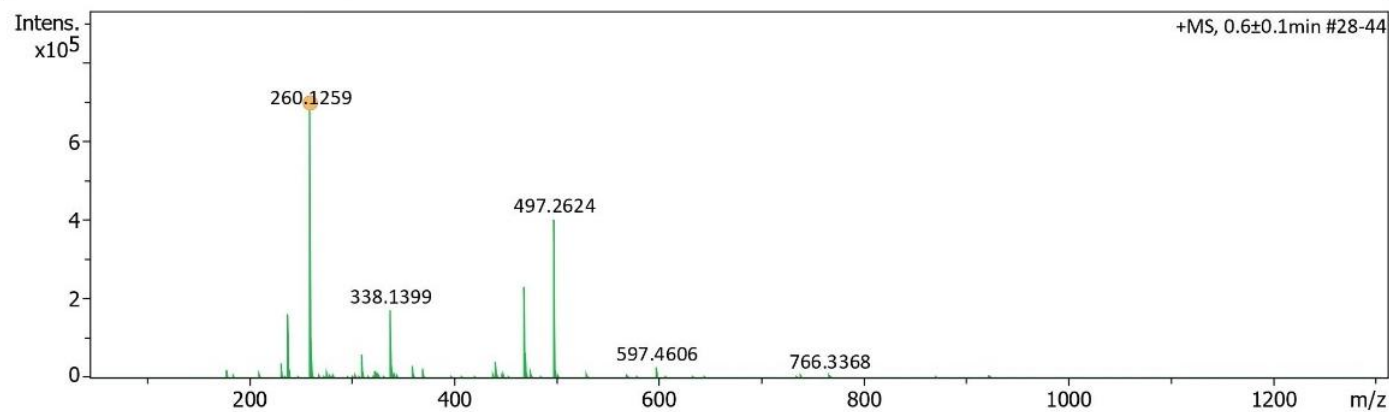

| Meas. m/z | # | Ion Formula                                       | m/z      | err [ppm] | mSigma | # mSigma | Score  | rdb | e <sup>-</sup> Conf | N-Rule |
|-----------|---|---------------------------------------------------|----------|-----------|--------|----------|--------|-----|---------------------|--------|
| 260.1259  | 1 | C <sub>13</sub> H <sub>19</sub> NNaO <sub>3</sub> | 260.1257 | -0.7      | 0.6    | 1        | 100.00 | 5.0 | even                | ok     |

<sup>1</sup>H NMR spectrum of compound **7** in DMSO-*d*<sub>6</sub>

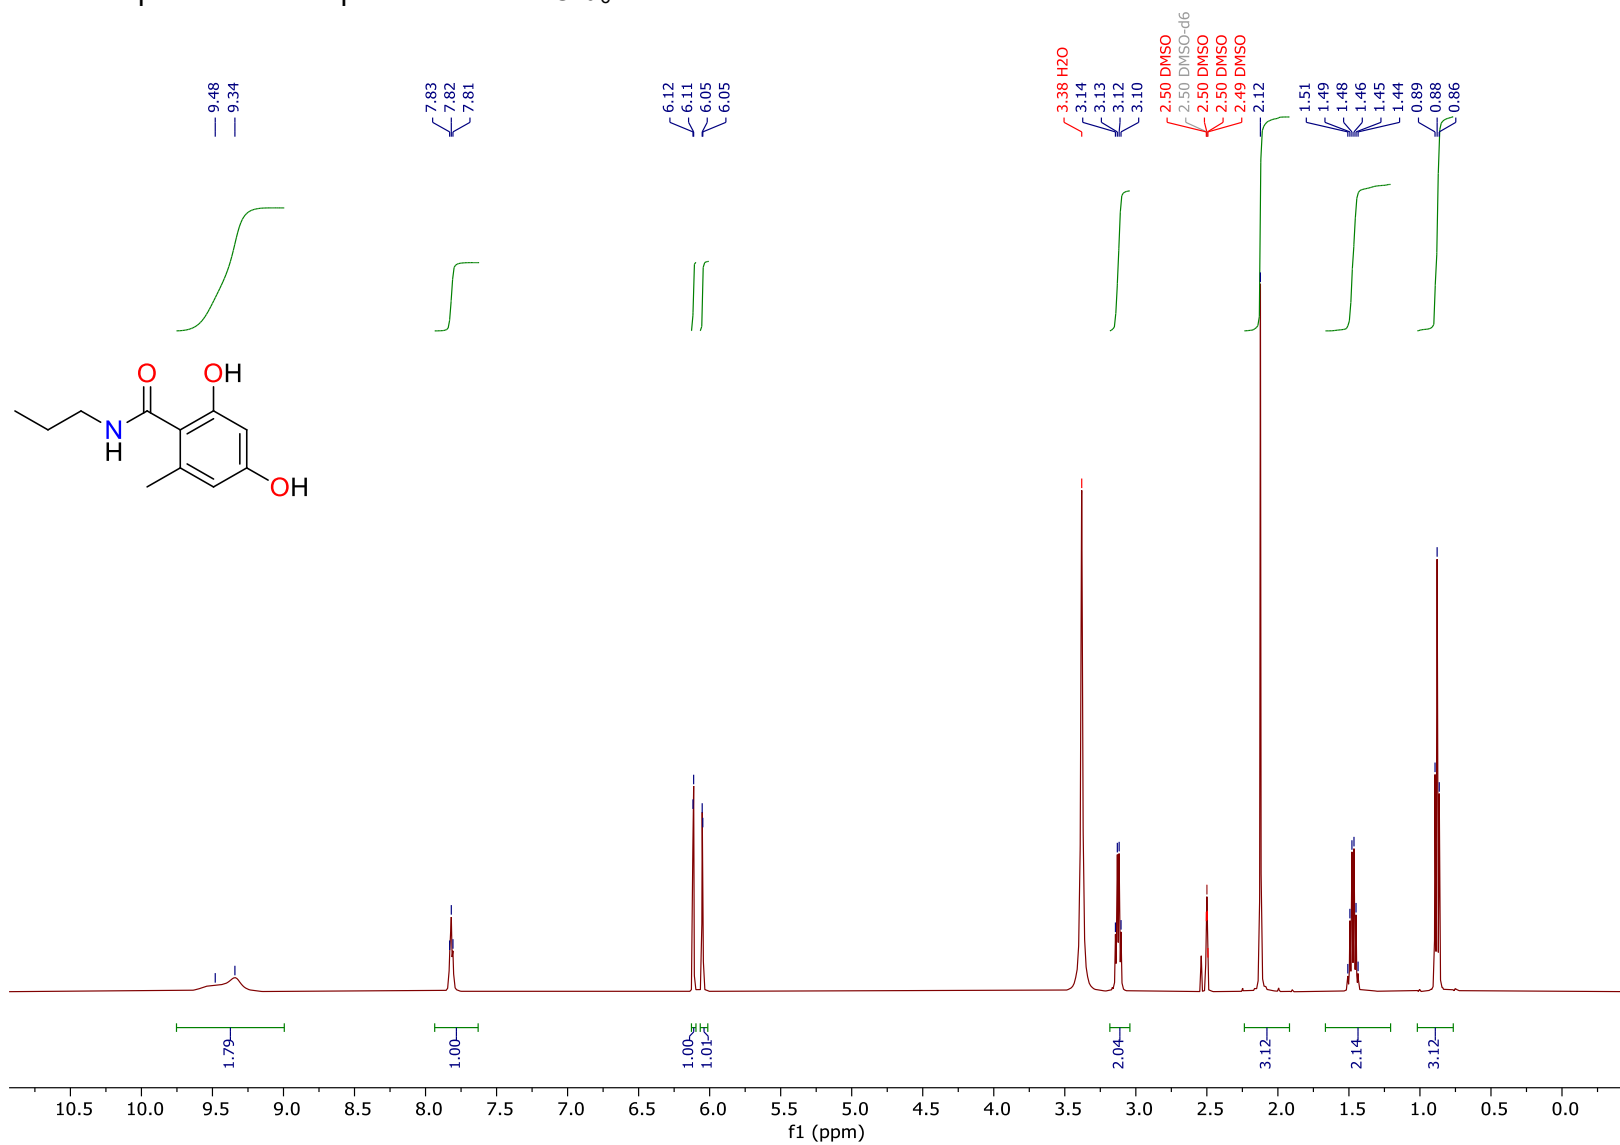

<sup>13</sup>C NMR spectrum of compound **7** in DMSO-*d*<sub>6</sub>

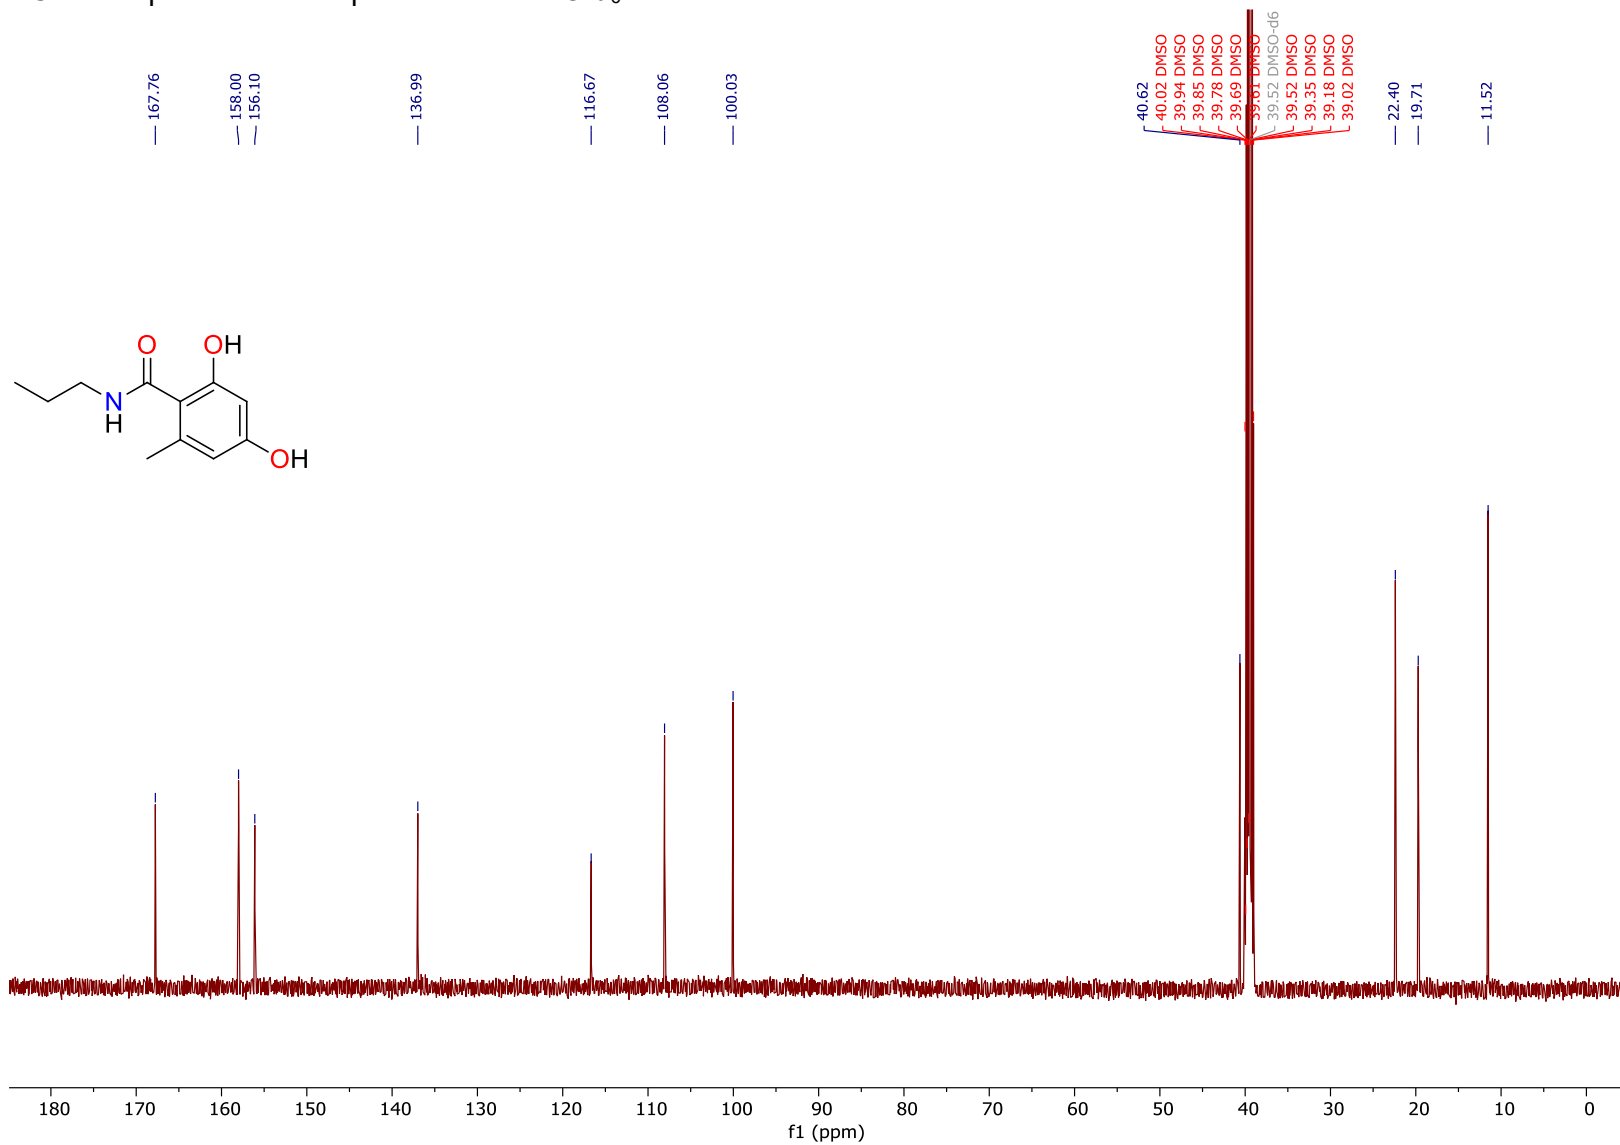

HSQC spectrum of compound 7 in DMSO- $d_6$

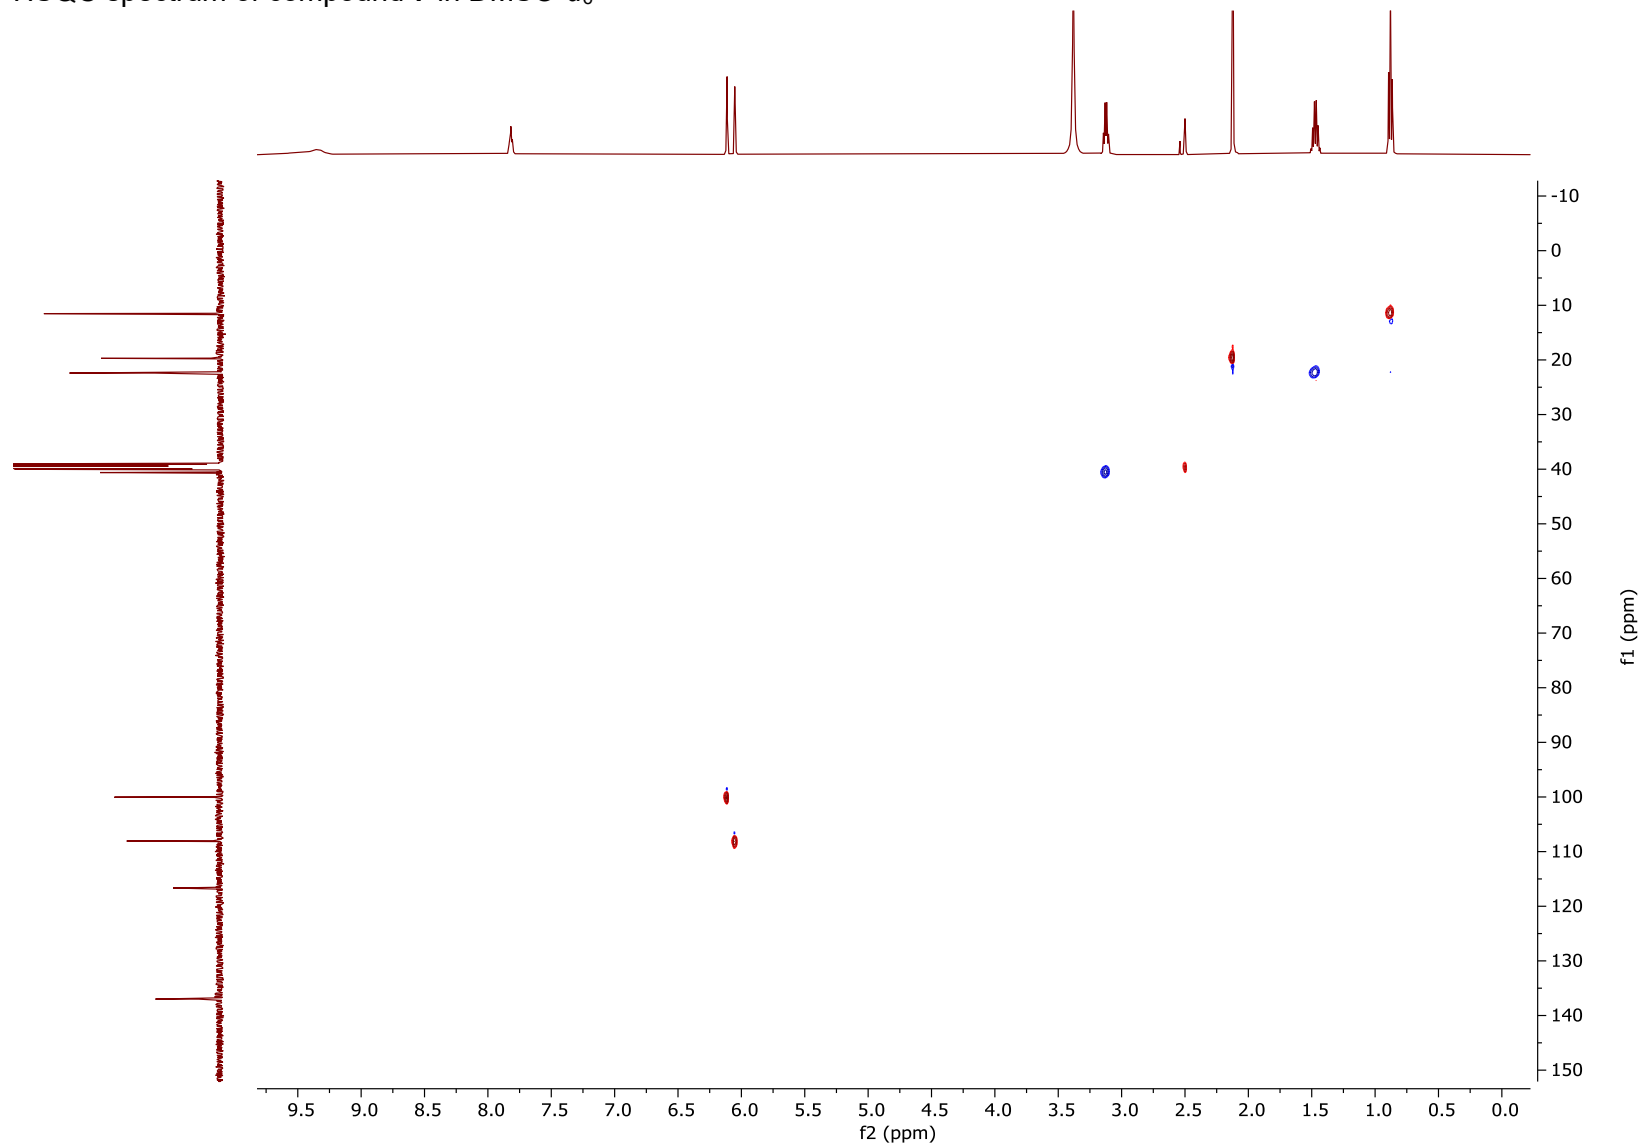

HMBC spectrum of compound 7 in DMSO- $d_6$

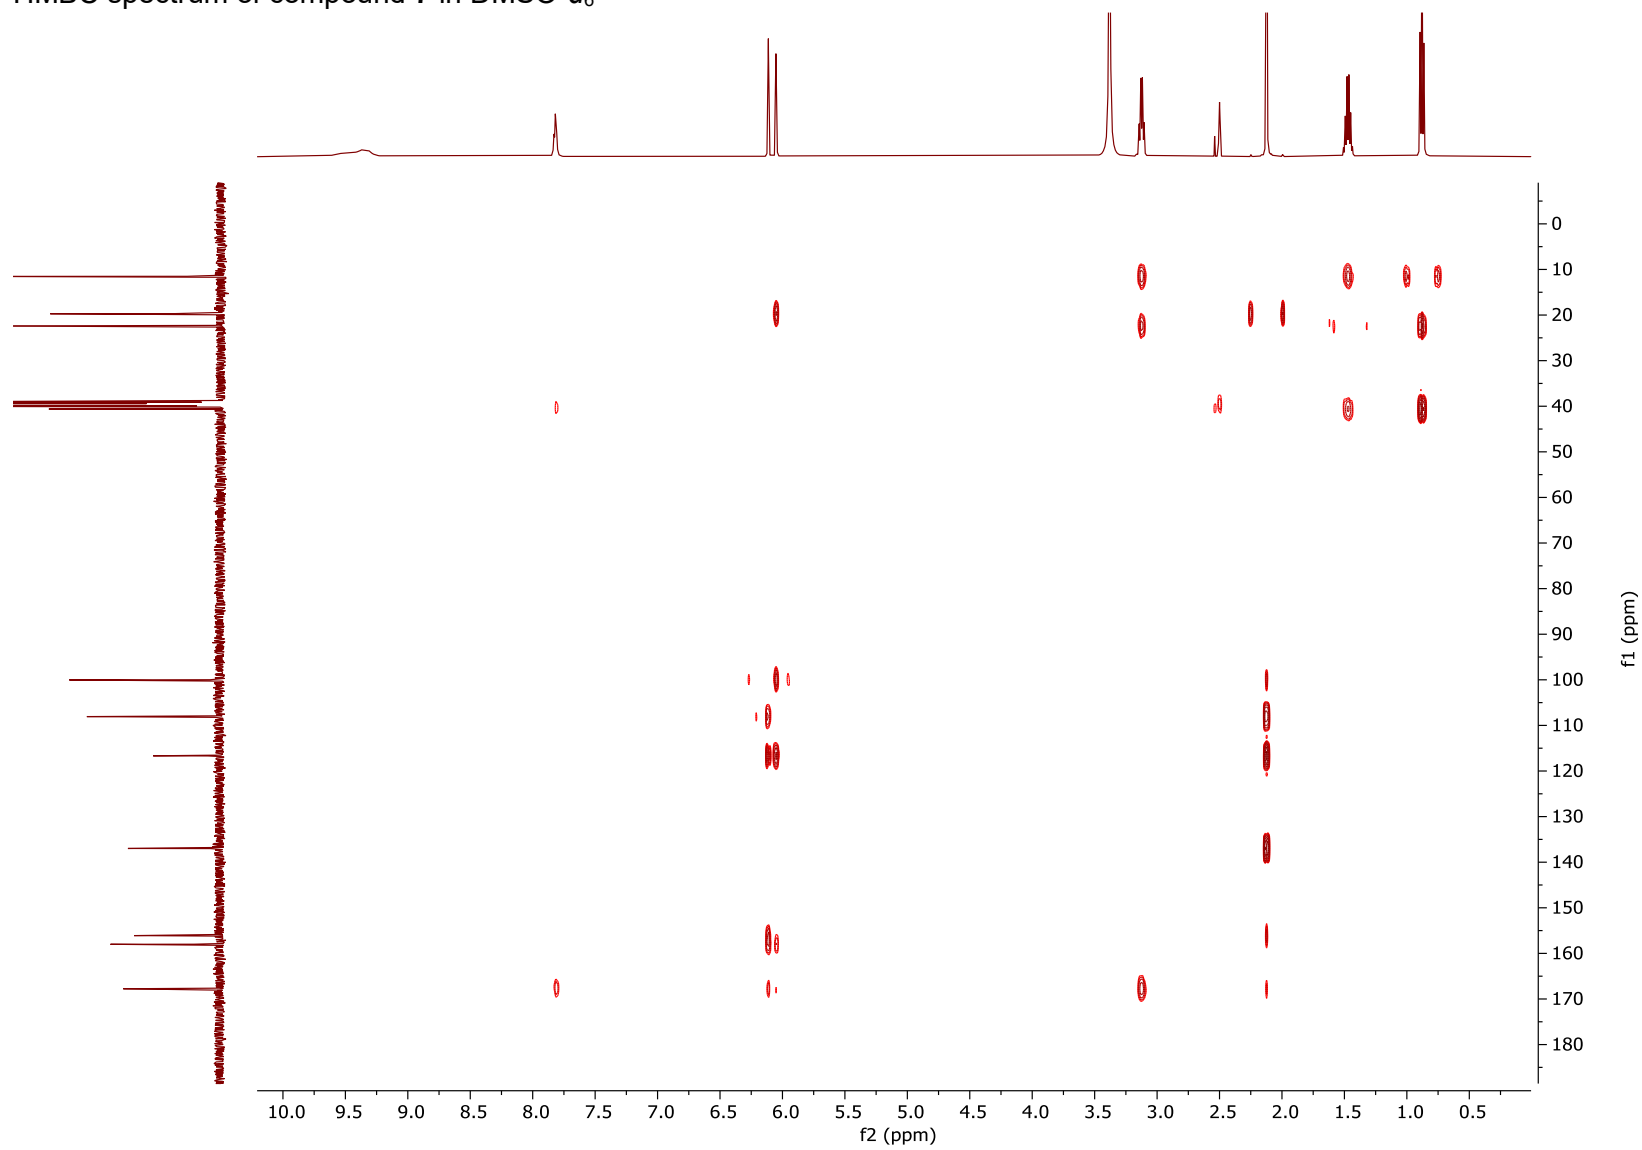

COSY spectrum of compound **7** in DMSO- $d_6$

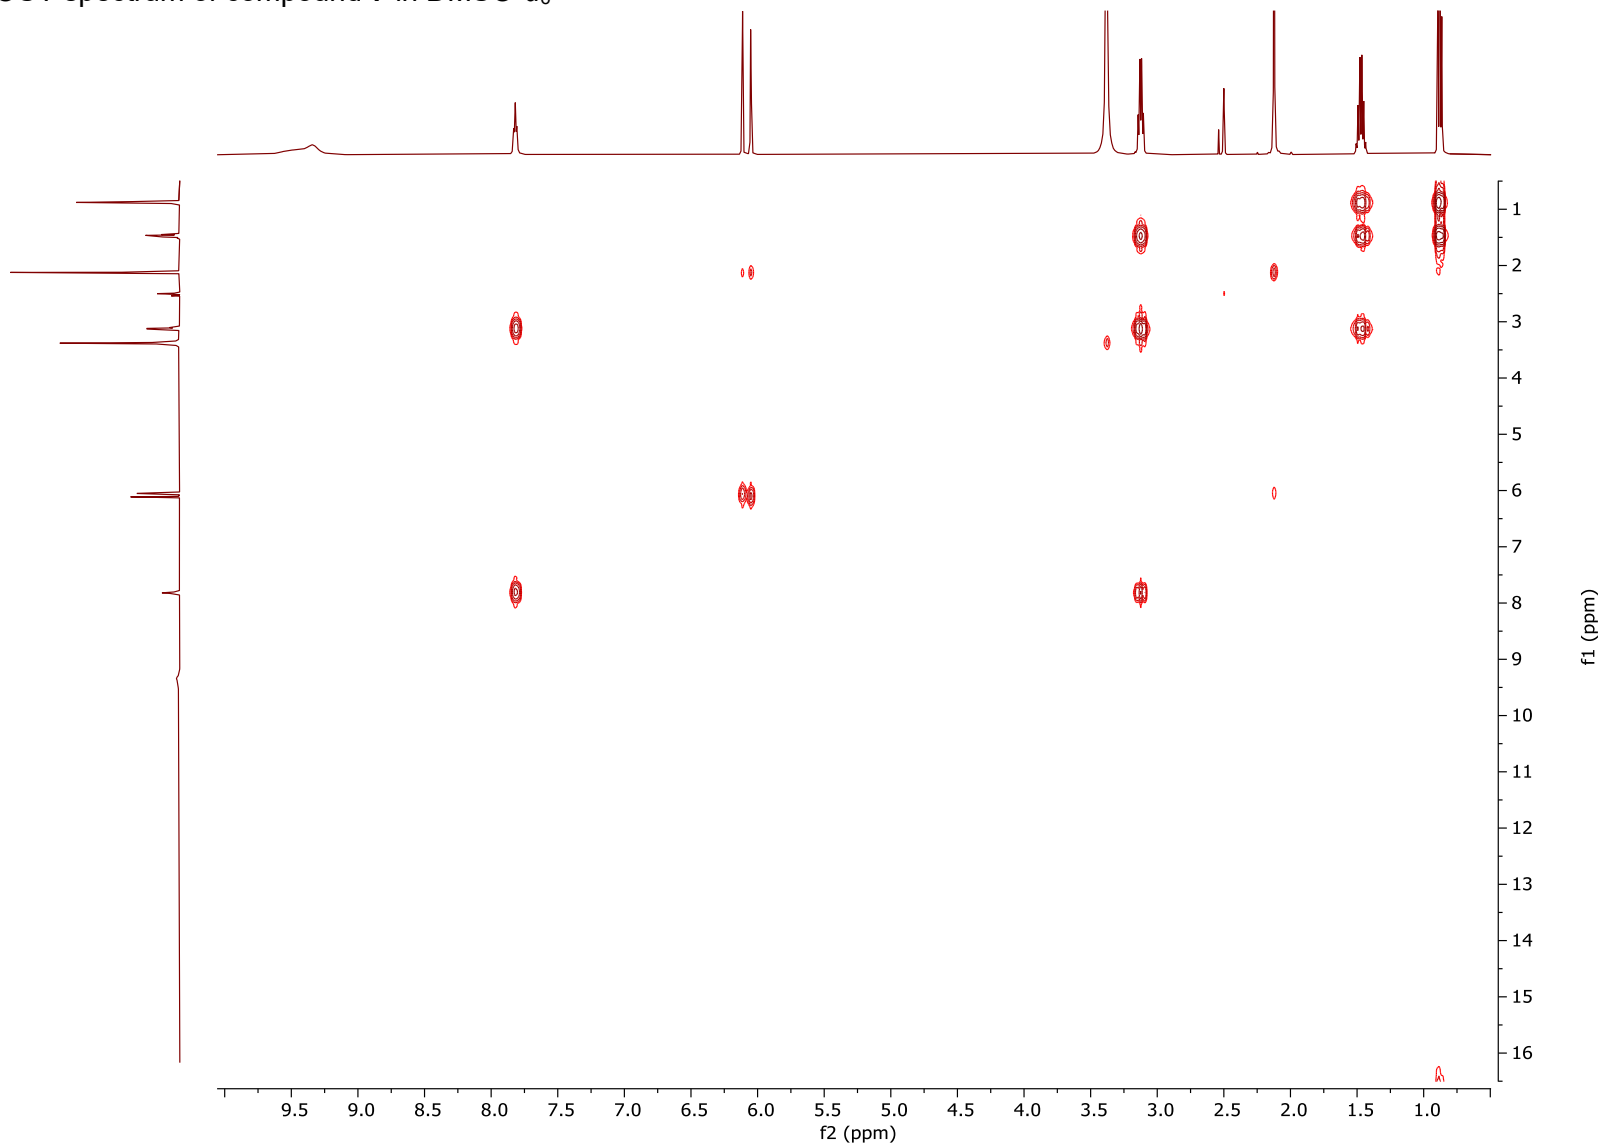

ROESY spectrum of compound **7** in DMSO- $d_6$

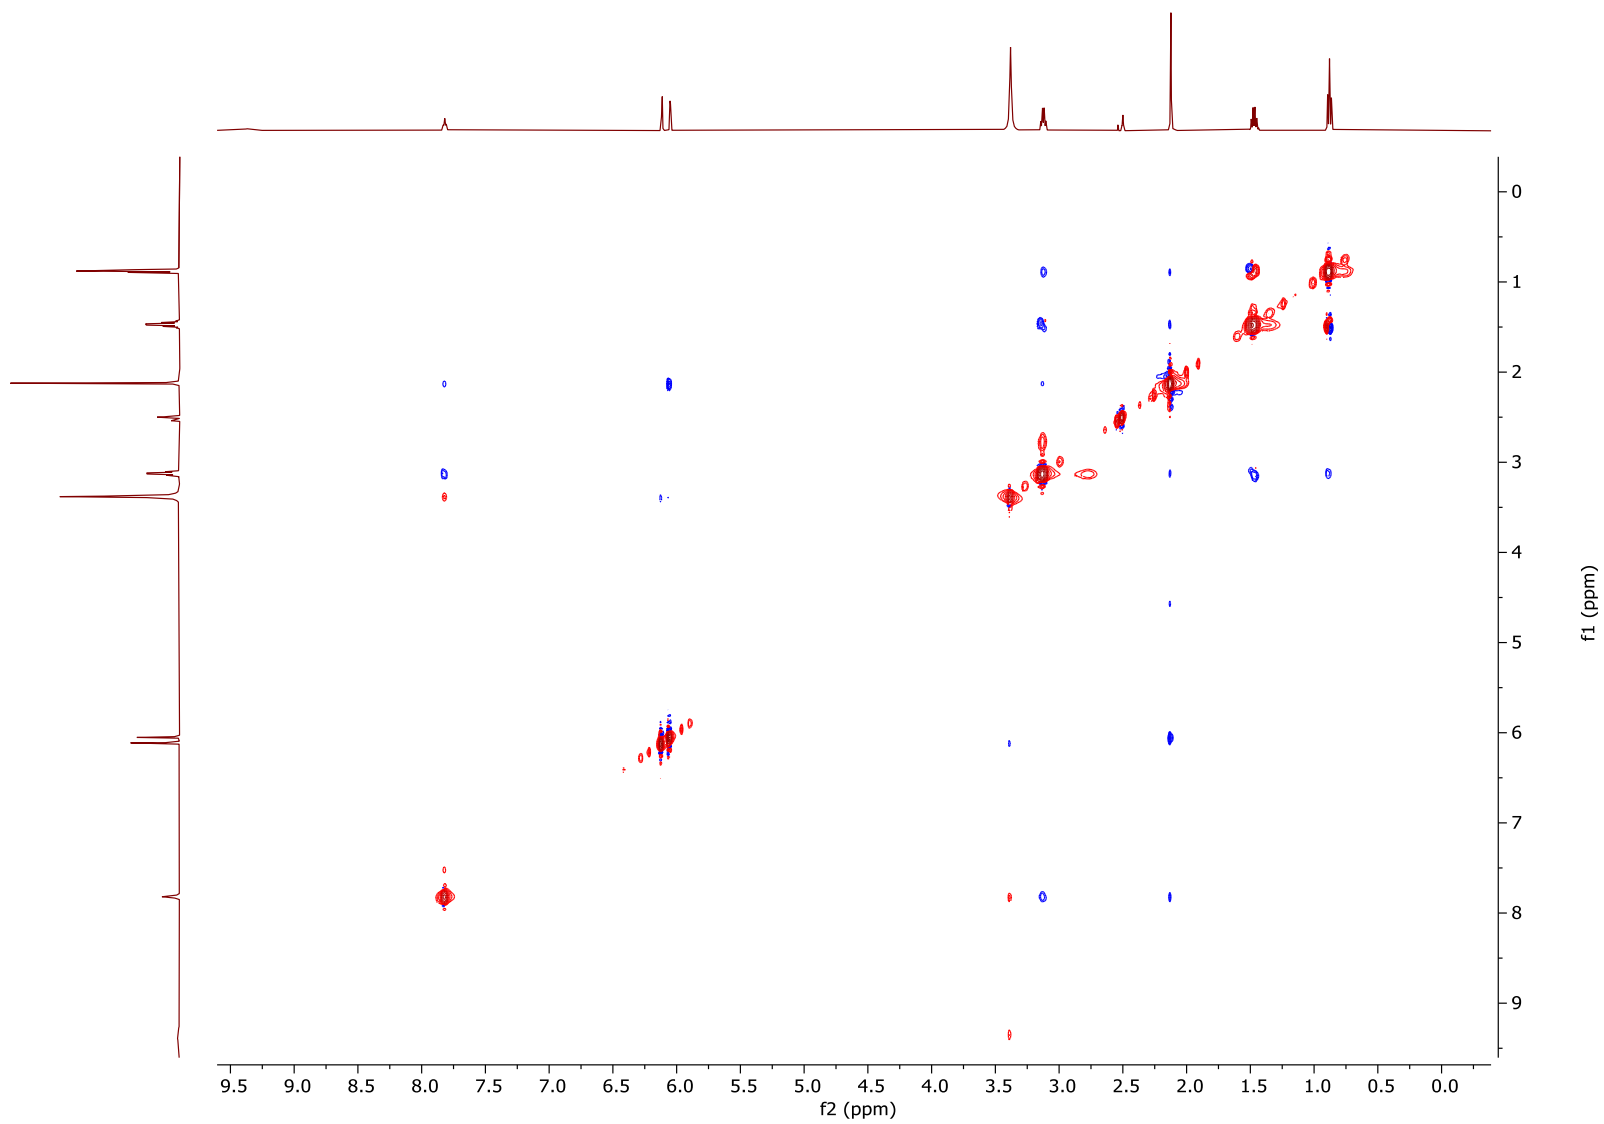

NMR data table for compound **7** in DMSO-*d*<sub>6</sub><sup>a</sup>

| Position | $\delta_{\text{H}}$ (mult., <i>J</i> in Hz) | $\delta_{\text{C}}$ , type | COSY                           | HMBC       | ROESY                        |
|----------|---------------------------------------------|----------------------------|--------------------------------|------------|------------------------------|
| 1        |                                             | 116.7, C                   |                                |            |                              |
| 2        |                                             | 156.1, C                   |                                |            |                              |
| 2-OH     | 9.48 (brs)                                  |                            |                                |            |                              |
| 3        | 6.11 (d, 2.2)                               | 100.0, CH                  | 5,6-Me <sup>w</sup>            | 1,2,4,5    | 4-OH,6-Me <sup>w</sup>       |
| 4        |                                             | 158.0, C                   |                                |            |                              |
| 4-OH     | 9.34 (brs)                                  |                            |                                |            | 3 <sup>w</sup>               |
| 5        | 6.05 (d, 2.2)                               | 108.1, CH                  | 3,6-Me <sup>w</sup>            | 1,3,4,6-Me | 4-OH,6-Me                    |
| 6        |                                             | 137.0, C                   |                                |            |                              |
| 6-Me     | 2.12 (s)                                    | 19.7, CH <sub>3</sub>      | 3 <sup>w</sup> ,5 <sup>w</sup> | 1,2,5,6,7  | 3,5,7-NH,8 <sup>w</sup>      |
| 7        |                                             | 167.8, C                   |                                |            |                              |
| 7-NH     | 7.82 (t, 5.6)                               |                            | 8                              | 7,8        | 6-Me,8,9 <sup>w</sup>        |
| 8        | 3.12 (dt, 5.6, 6.6)                         | 40.6, CH <sub>2</sub>      | 7-NH, 9                        | 7,9,10     | 6-Me <sup>w</sup> ,7-NH,9,10 |
| 9        | 1.48 (tq, 6.6,7.4)                          | 22.4, CH <sub>2</sub>      | 8,10                           | 8,10       | 7-NH <sup>w</sup> ,8,10      |
| 10       | 0.88 (t, 7.4)                               | 11.5, CH <sub>3</sub>      | 9                              | 8,9        | 8,9                          |

<sup>a</sup> Spectra recorded at 25 °C (500 MHz for <sup>1</sup>H NMR and 125 MHz for <sup>13</sup>C NMR); <sup>w</sup> Weak correlation.

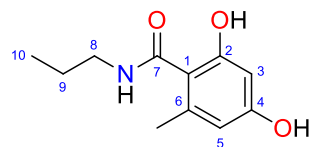

# High resolution mass spectrum of compound 7

## Mass Spectrum SmartFormula Report

### Analysis Info

Analysis Name D:\Data\Sasha\20231004\RAD915D000001.d  
Method DirectInfusion\_2018\_pos.m  
Sample Name RAD915D  
Comment

Acquisition Date 10/4/2023 2:05:35 PM

Operator Demo User  
Instrument maXis II ETD

### Acquisition Parameter

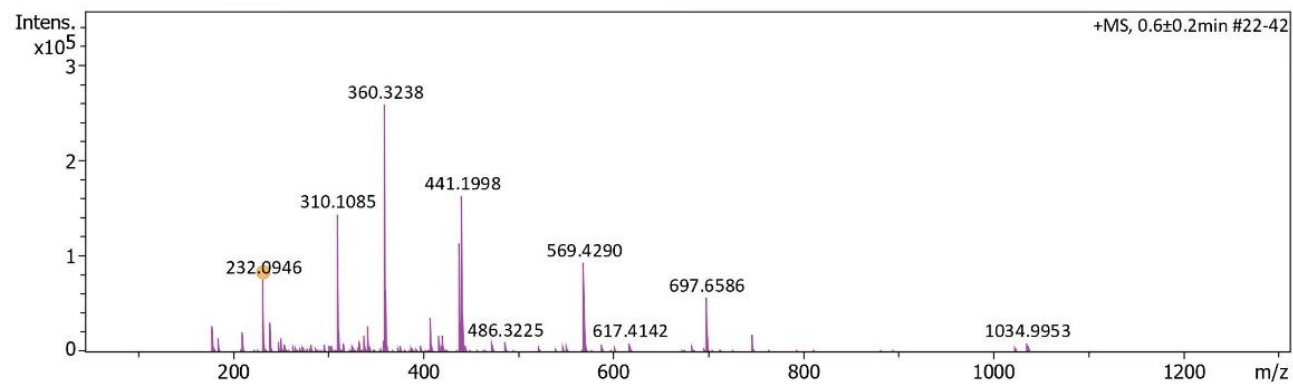

| Meas. m/z | # | Ion Formula                                       | m/z      | err [ppm] | mSigma | # mSigma | Score  | rdb | e <sup>-</sup> Conf | N-Rule |
|-----------|---|---------------------------------------------------|----------|-----------|--------|----------|--------|-----|---------------------|--------|
| 232.0946  | 1 | C <sub>11</sub> H <sub>15</sub> NNaO <sub>3</sub> | 232.0944 | -0.7      | 7.4    | 1        | 100.00 | 5.0 | even                | ok     |

<sup>1</sup>H NMR spectrum of compound **8** in DMSO-*d*<sub>6</sub>

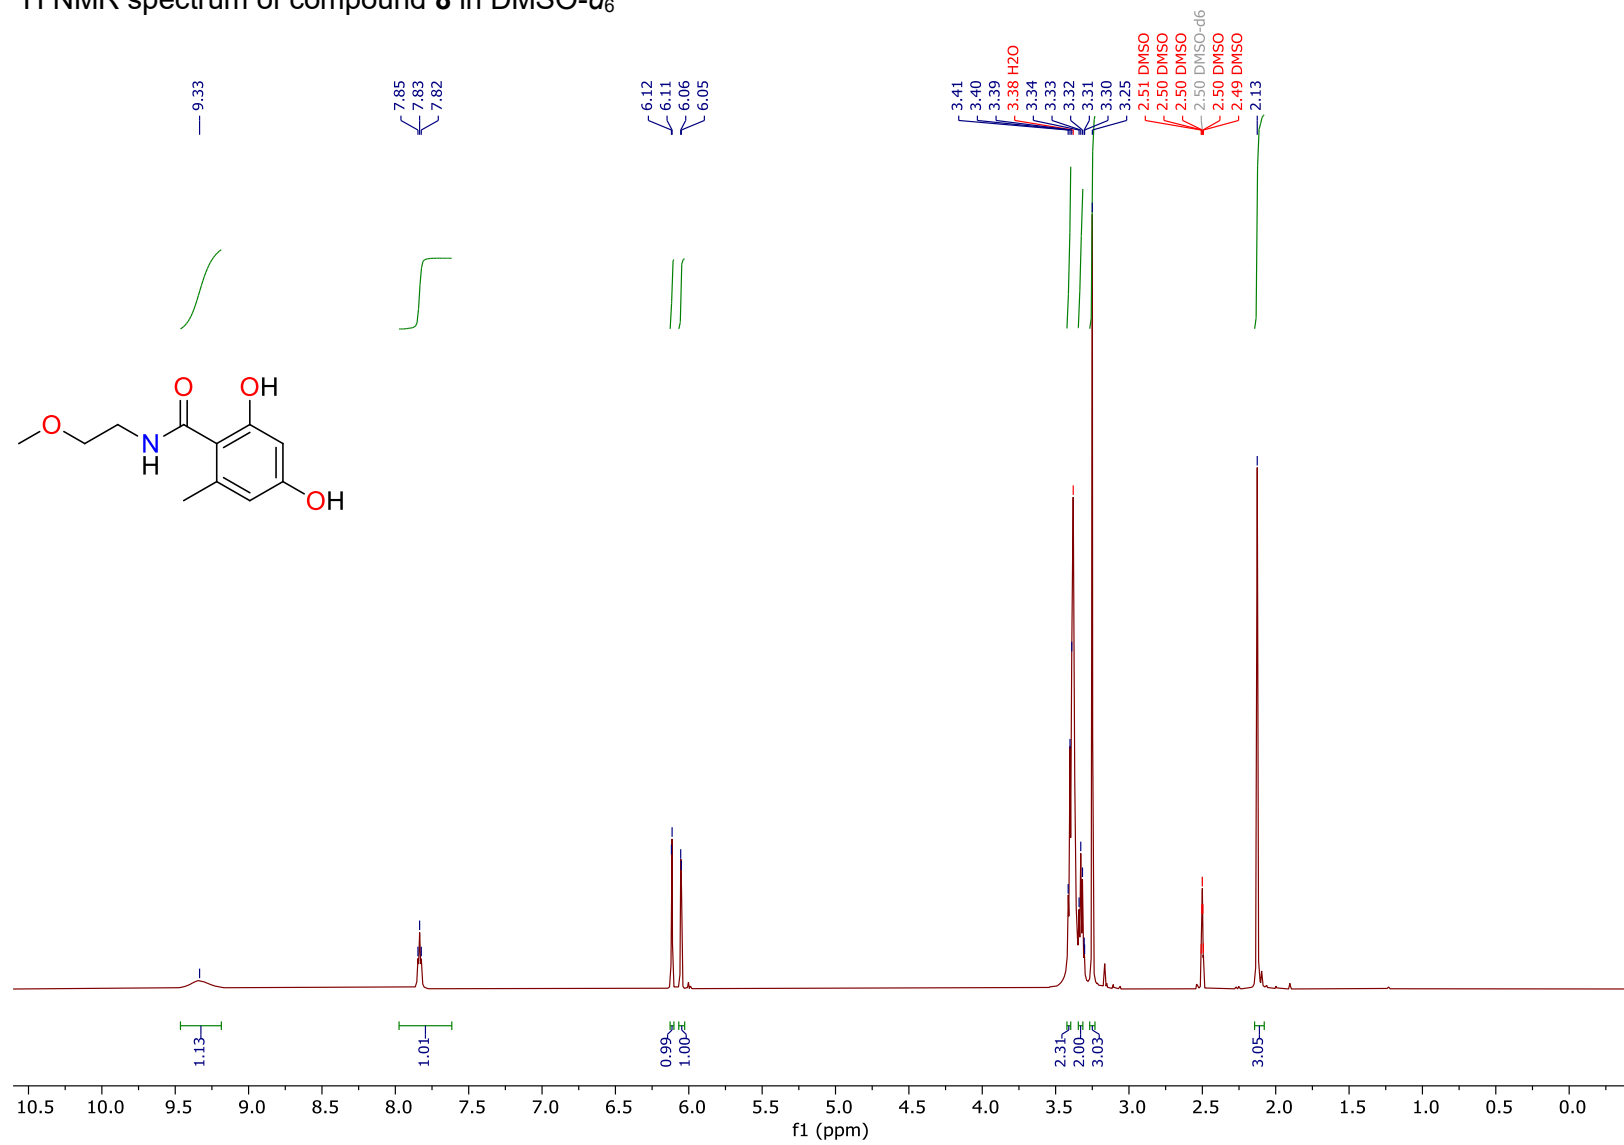

$^{13}\text{C}$  NMR spectrum of compound **8** in  $\text{DMSO-}d_6$

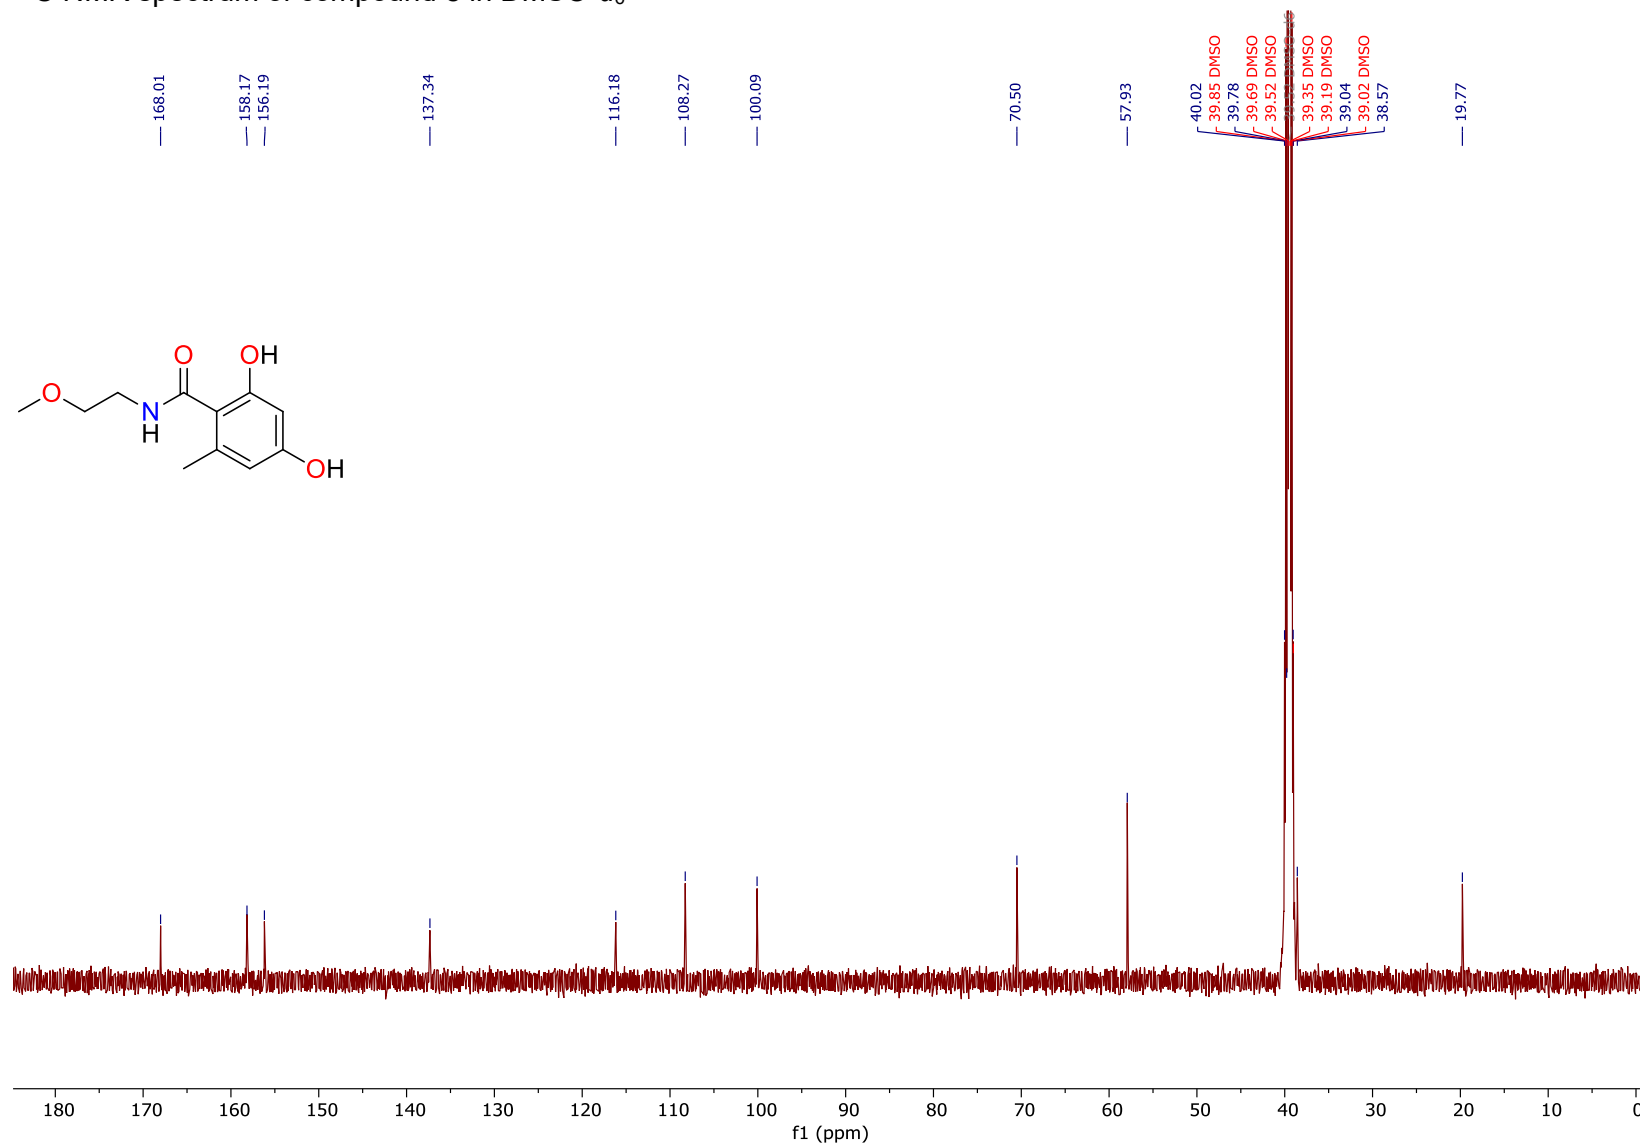

HSQC spectrum of compound **8** in DMSO- $d_6$

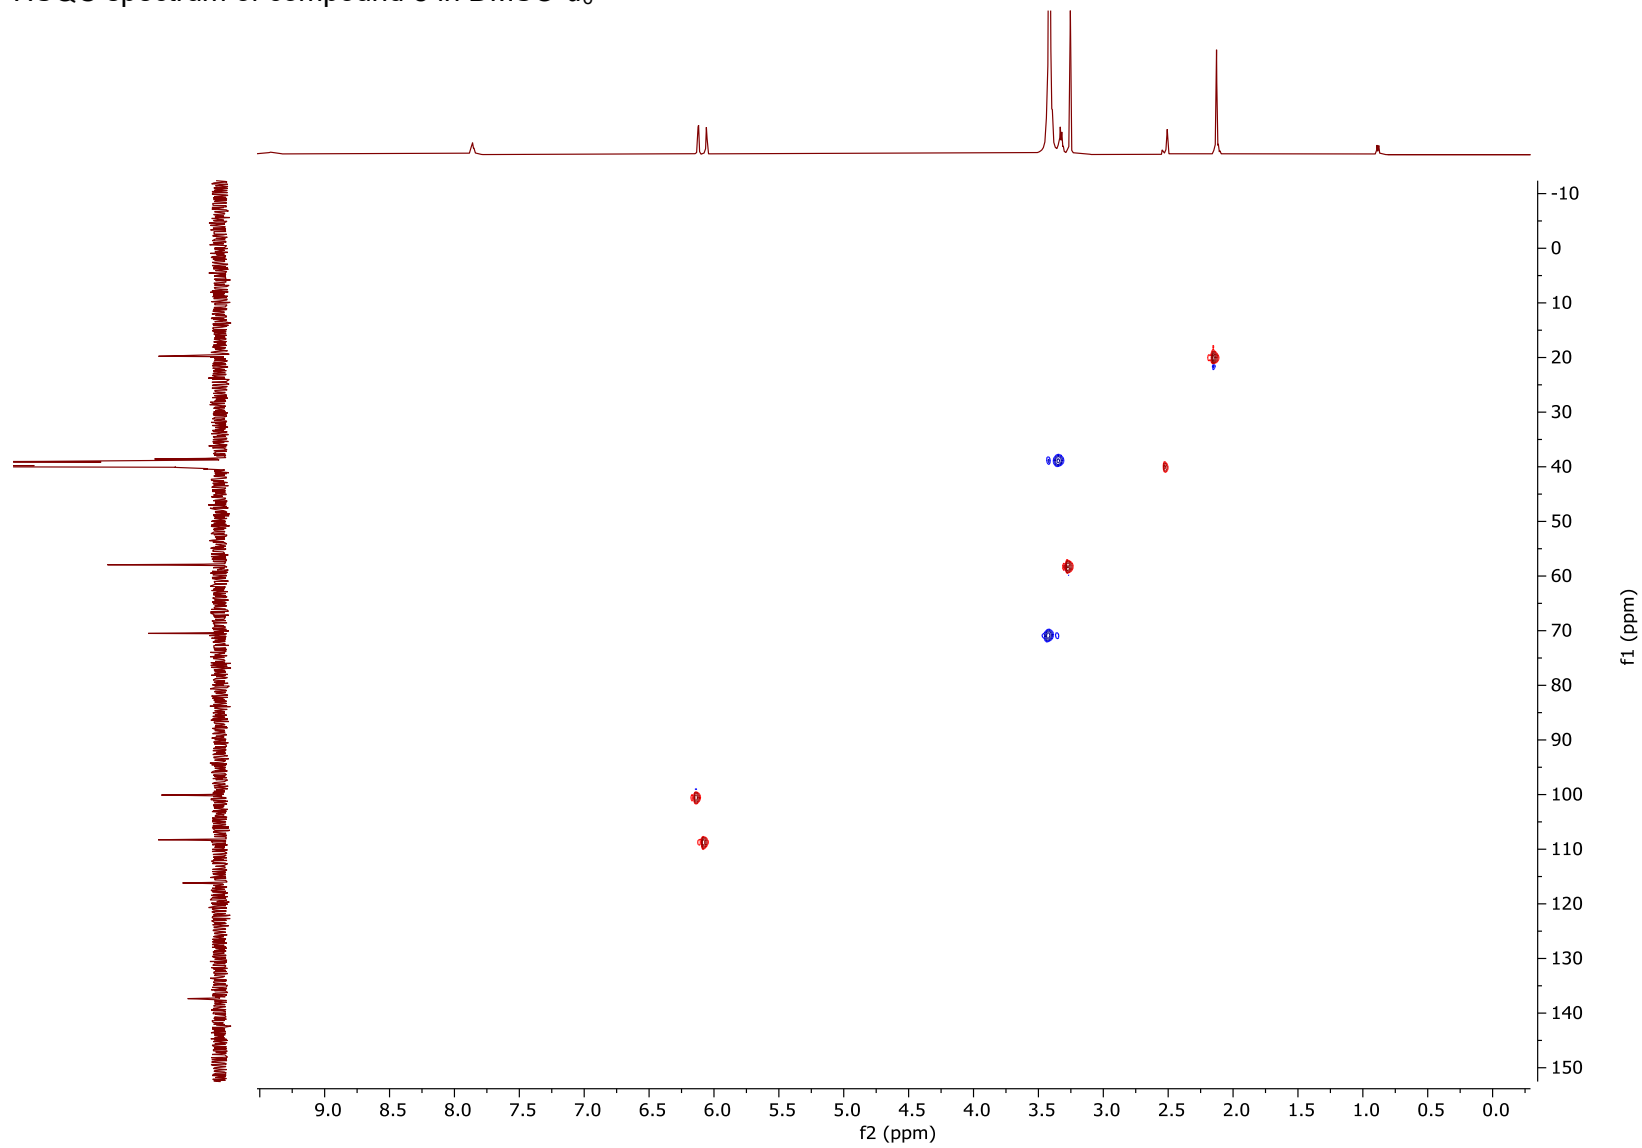

HMBC spectrum of compound **8** in DMSO- $d_6$

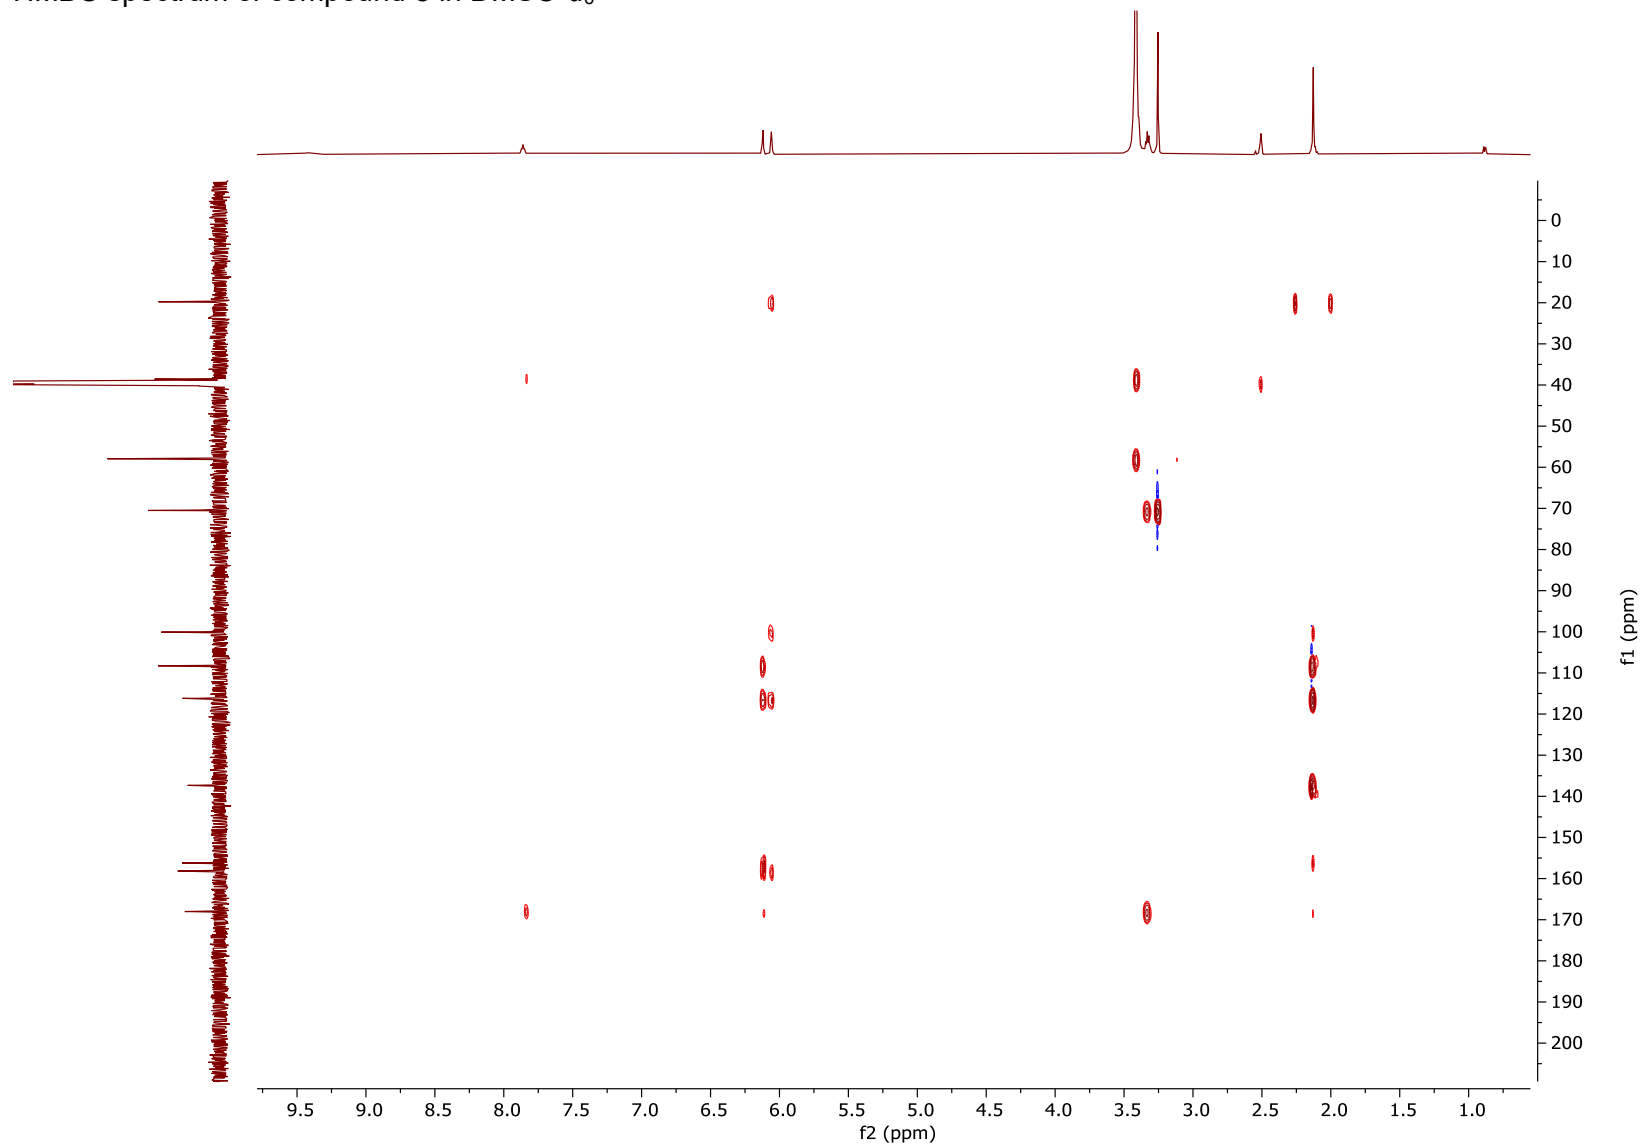

COSY spectrum of compound **8** in DMSO- $d_6$

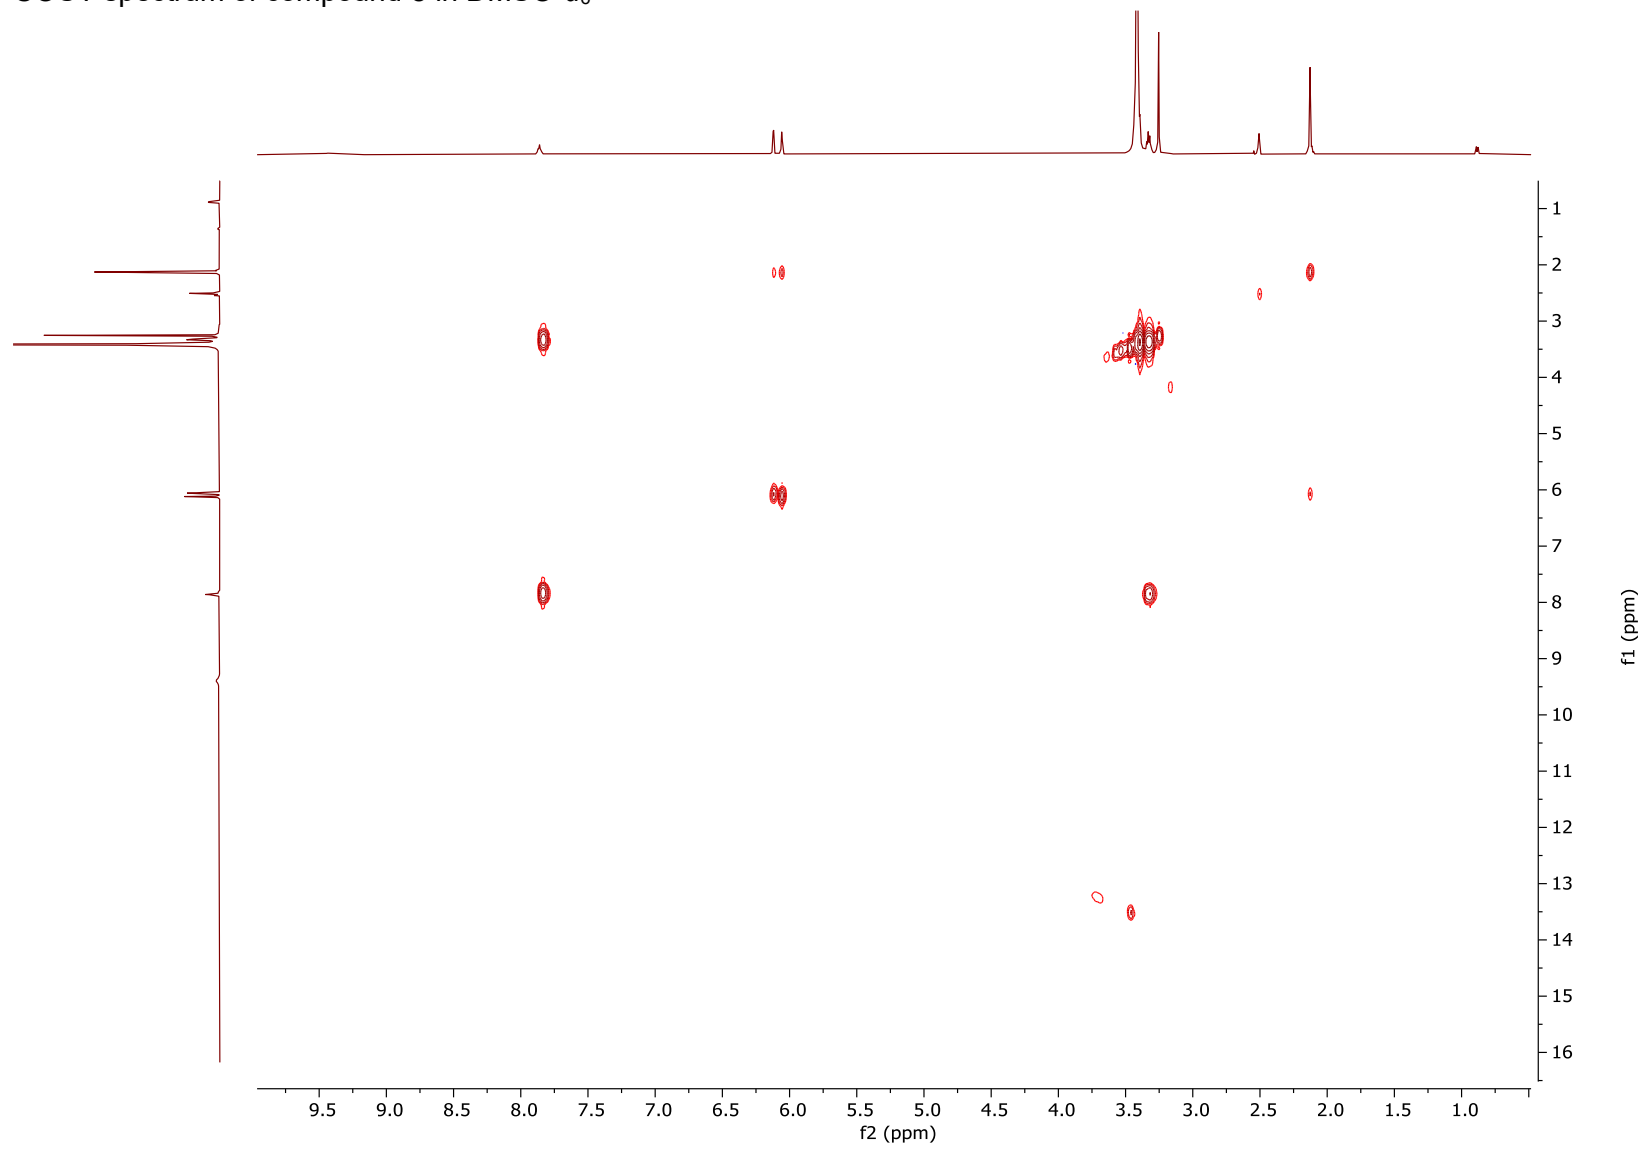

ROESY spectrum of compound **8** in DMSO- $d_6$

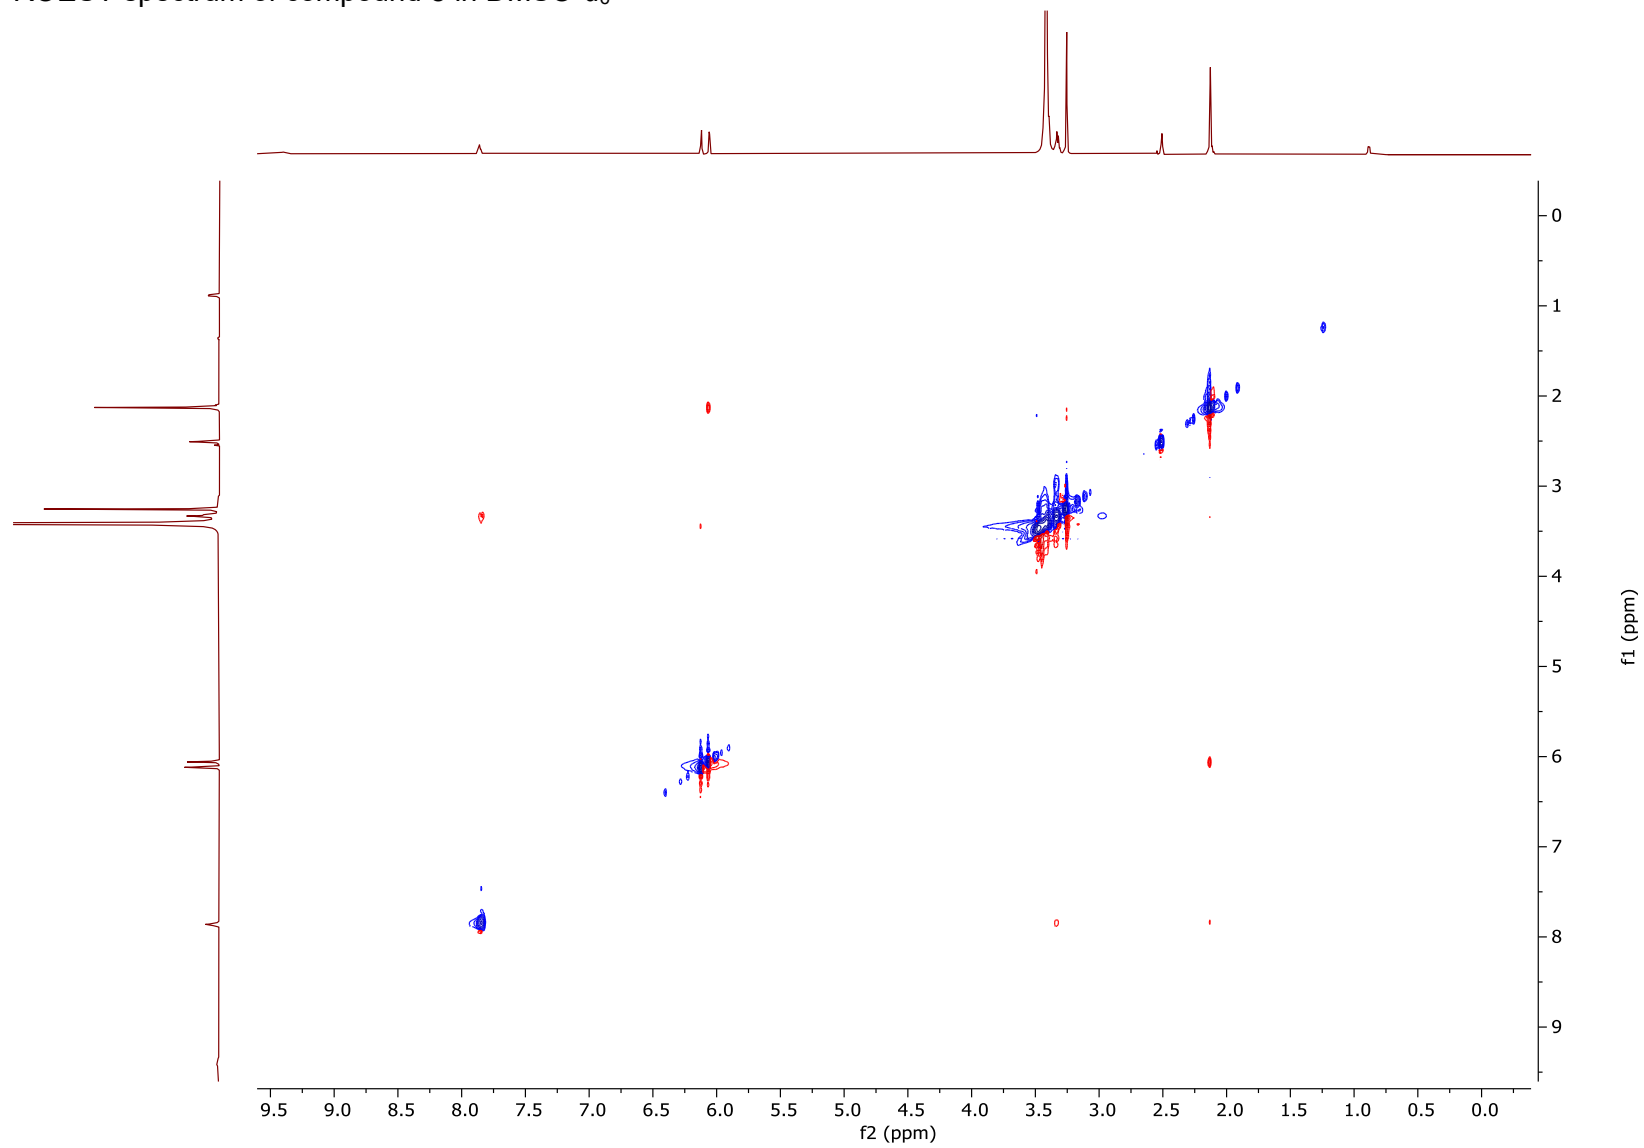

NMR data table for compound **8** in DMSO-*d*<sub>6</sub><sup>a</sup>

| Position | $\delta_{\text{H}}$ (mult., <i>J</i> in Hz) | $\delta_{\text{C}}$ , type | COSY                           | HMBC                   | ROESY                   |
|----------|---------------------------------------------|----------------------------|--------------------------------|------------------------|-------------------------|
| 1        |                                             | 116.2, C                   |                                |                        |                         |
| 2        |                                             | 156.2, C                   |                                |                        |                         |
| 2-OH     | <sup>b</sup>                                |                            |                                |                        |                         |
| 3        | 6.11 (d, 2.2)                               | 100.1, CH                  | 5,6-Me <sup>w</sup>            | 1,4,5                  | 6-Me                    |
| 4        |                                             | 158.2, C                   |                                |                        |                         |
| 4-OH     | 9.33 (brs)                                  |                            |                                |                        |                         |
| 5        | 6.05 (d, 2.2)                               | 108.3, CH                  | 3,6-Me <sup>w</sup>            | 1,3,4,6-Me             | 6-Me                    |
| 6        |                                             | 137.3, C                   |                                |                        |                         |
| 6-Me     | 2.13 (s)                                    | 19.8, CH <sub>3</sub>      | 3 <sup>w</sup> ,5 <sup>w</sup> | 1,2,5,6,7 <sup>w</sup> | 5,7-NH <sup>w</sup>     |
| 7        |                                             | 168.0, C                   |                                |                        |                         |
| 7-NH     | 7.83 (t, 5.7)                               |                            | 8                              | 7,8                    | 6-Me <sup>w</sup> ,8,9  |
| 8        | 3.33 (dt, 5.7, 5.8)                         | 38.6, CH <sub>2</sub>      | 7-NH, 9                        | 7,9                    | 7-NH,9,10               |
| 9        | 3.40 (t, 5.8)                               | 70.5, CH <sub>2</sub>      | 8                              | 8,10                   | 7-NH <sup>w</sup> ,8,10 |
| 10       | 3.25 (s)                                    | 57.9, CH <sub>3</sub>      |                                | 9                      | 8,9                     |

<sup>a</sup> Spectra recorded at 25 °C (500 MHz for <sup>1</sup>H NMR and 125 MHz for <sup>13</sup>C NMR); <sup>b</sup> Not observed; <sup>w</sup> Weak correlation.

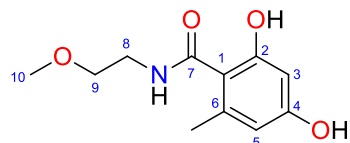

High resolution mass spectrum of compound **8**

## Mass Spectrum SmartFormula Report

**Analysis Info**

Analysis Name D:\Data\Sasha\20231004\RAD915A000001.d  
 Method DirectInfusion\_2018\_pos.m  
 Sample Name RAD915A  
 Comment

Acquisition Date 10/4/2023 1:48:42 PM

Operator Demo User  
 Instrument maXis II ETD

**Acquisition Parameter**

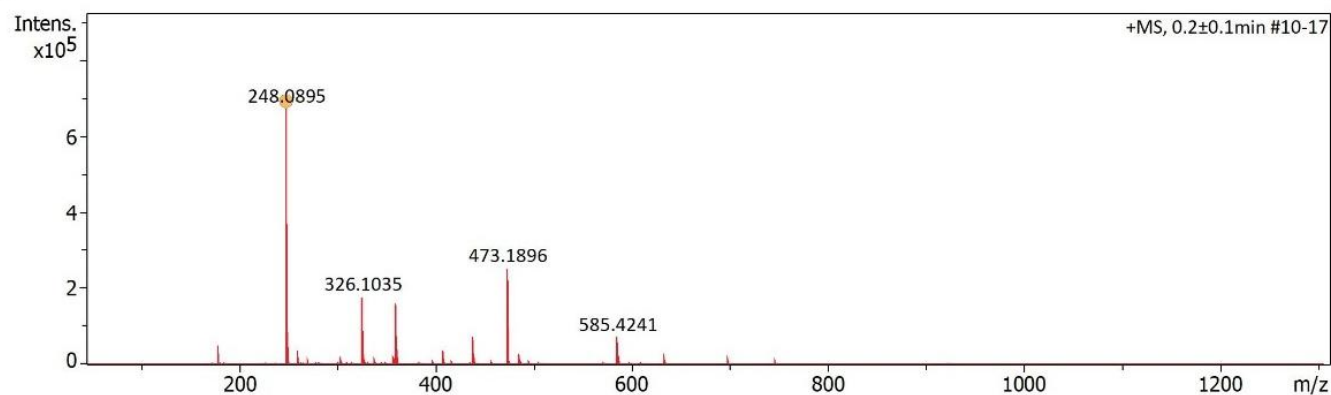

| Meas. m/z | # | Ion Formula | m/z      | err [ppm] | mSigma | # mSigma | Score  | rdb  | e <sup>-</sup> Conf | N-Rule |
|-----------|---|-------------|----------|-----------|--------|----------|--------|------|---------------------|--------|
| 248.0895  | 1 | C11H15NNaO4 | 248.0893 | -0.7      | 0.3    | 1        | 100.00 | 5.0  | even                | ok     |
|           | 2 | C12H11N5Na  | 248.0907 | 4.7       | 13.6   | 2        | 47.59  | 10.0 | even                | ok     |
|           | 3 | C7H11N7NaO2 | 248.0866 | -11.5     | 13.7   | 3        | 12.91  | 6.0  | even                | ok     |

<sup>1</sup>H NMR spectrum of compound **9** in DMSO-*d*<sub>6</sub>

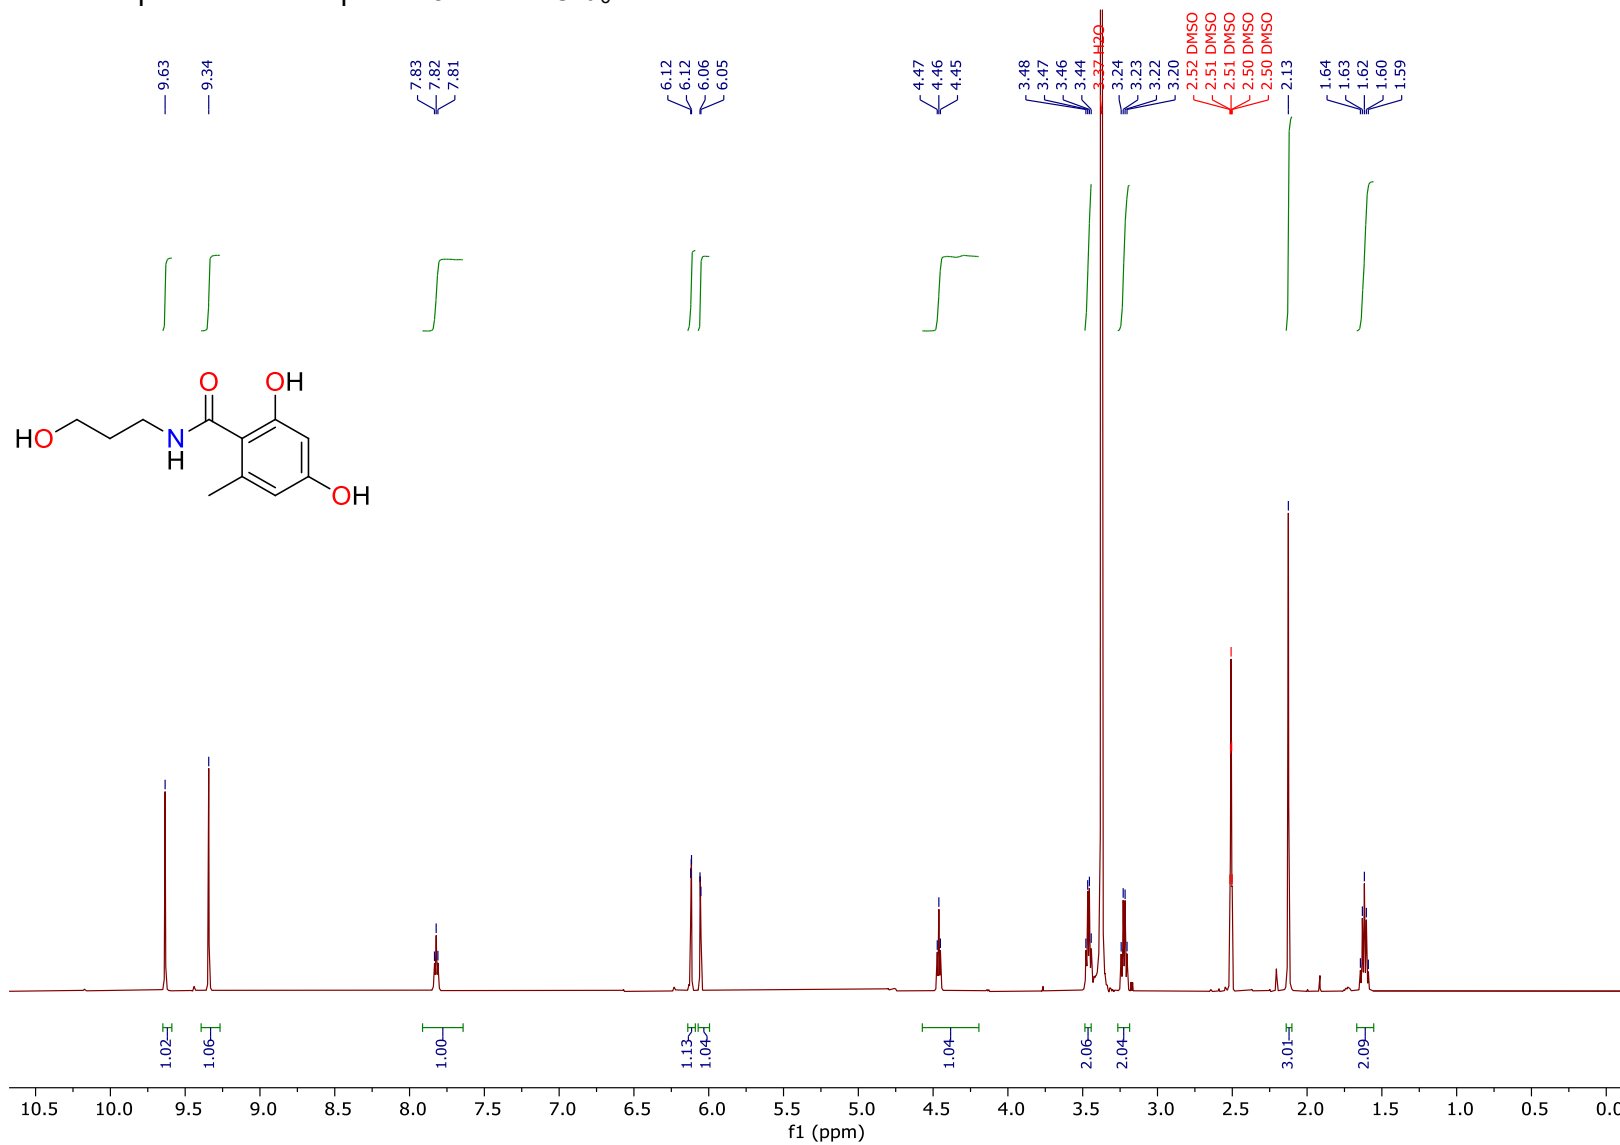

$^{13}\text{C}$  NMR spectrum of compound **9** in  $\text{DMSO-}d_6$

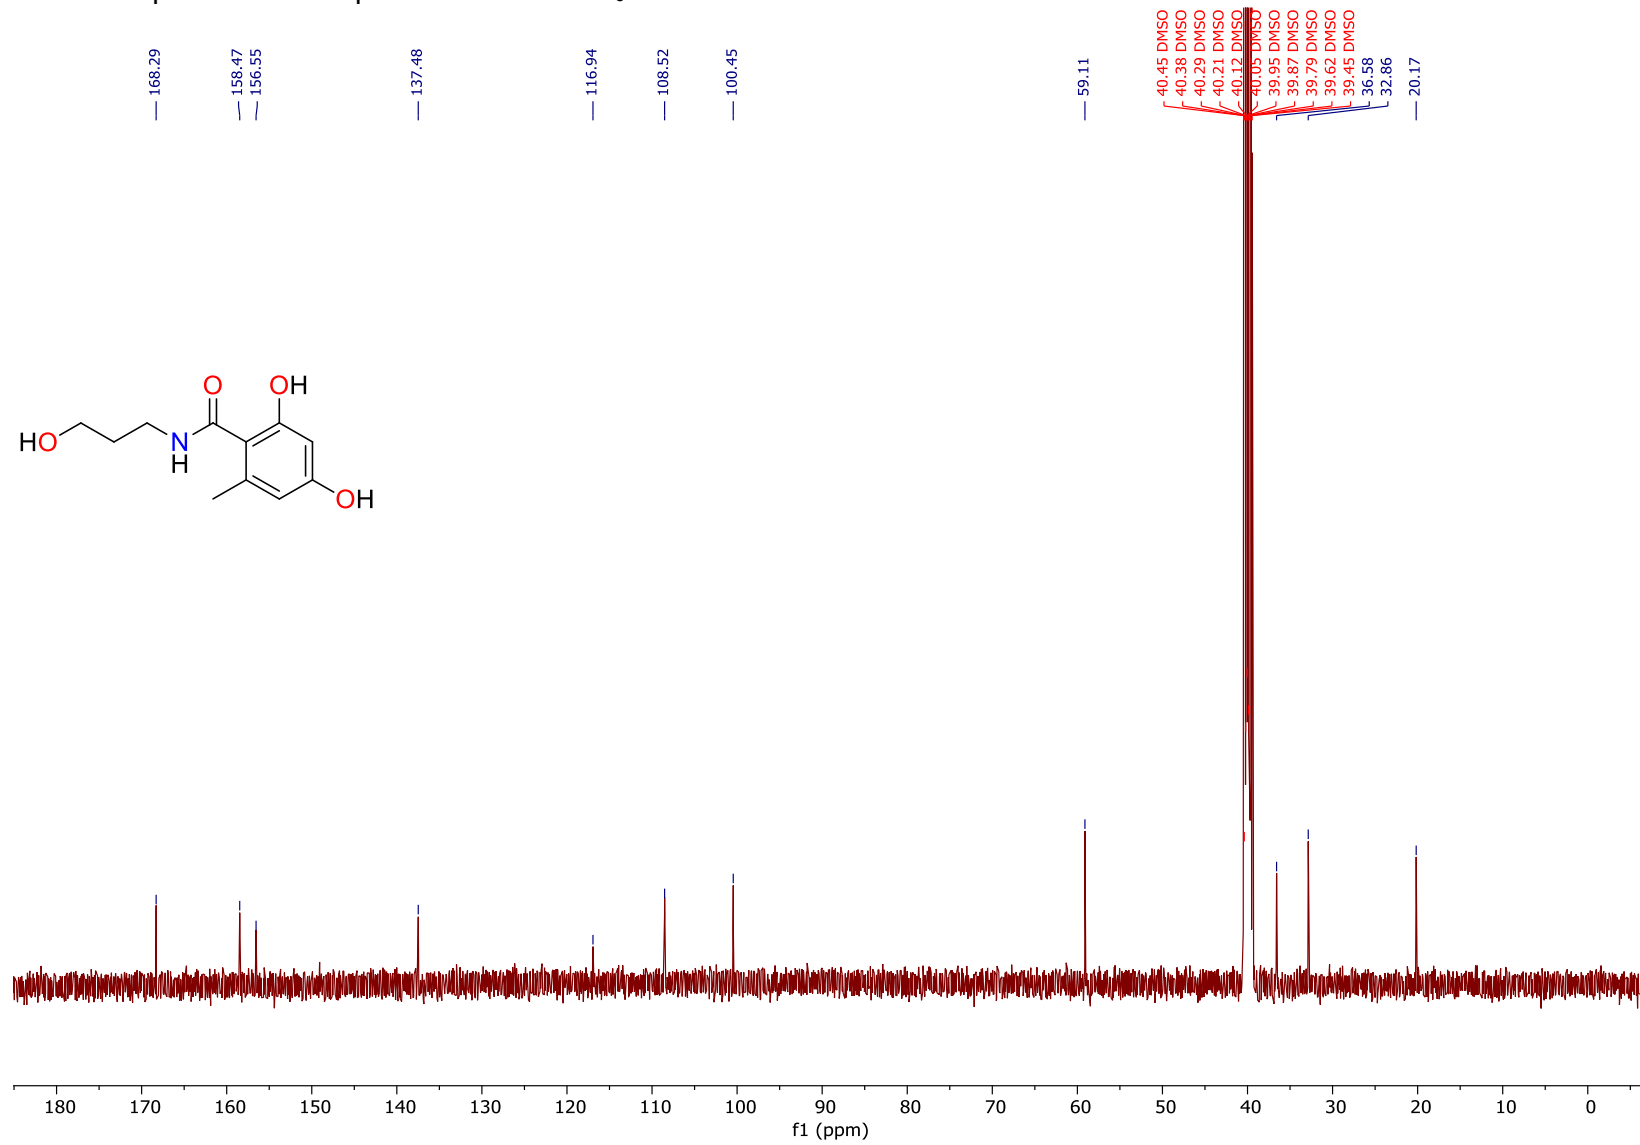

HSQC spectrum of compound **9** in DMSO- $d_6$

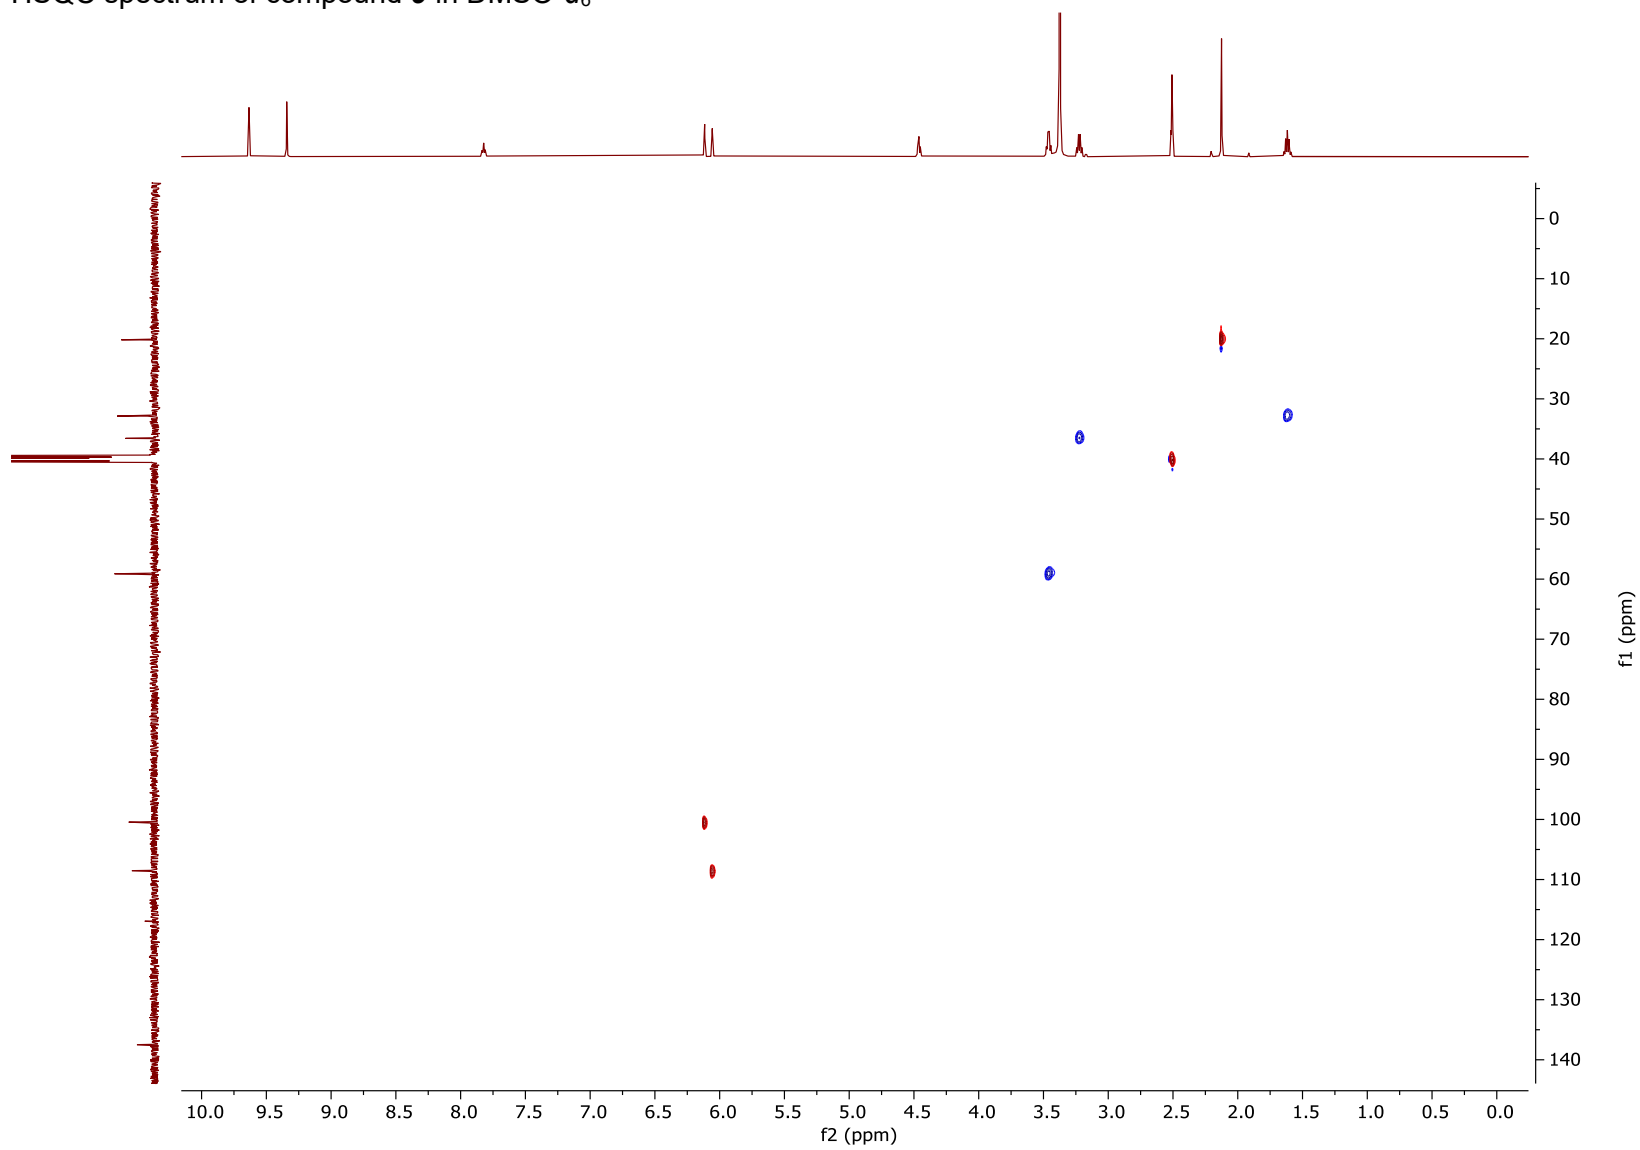

HMBC spectrum of compound **9** in DMSO- $d_6$

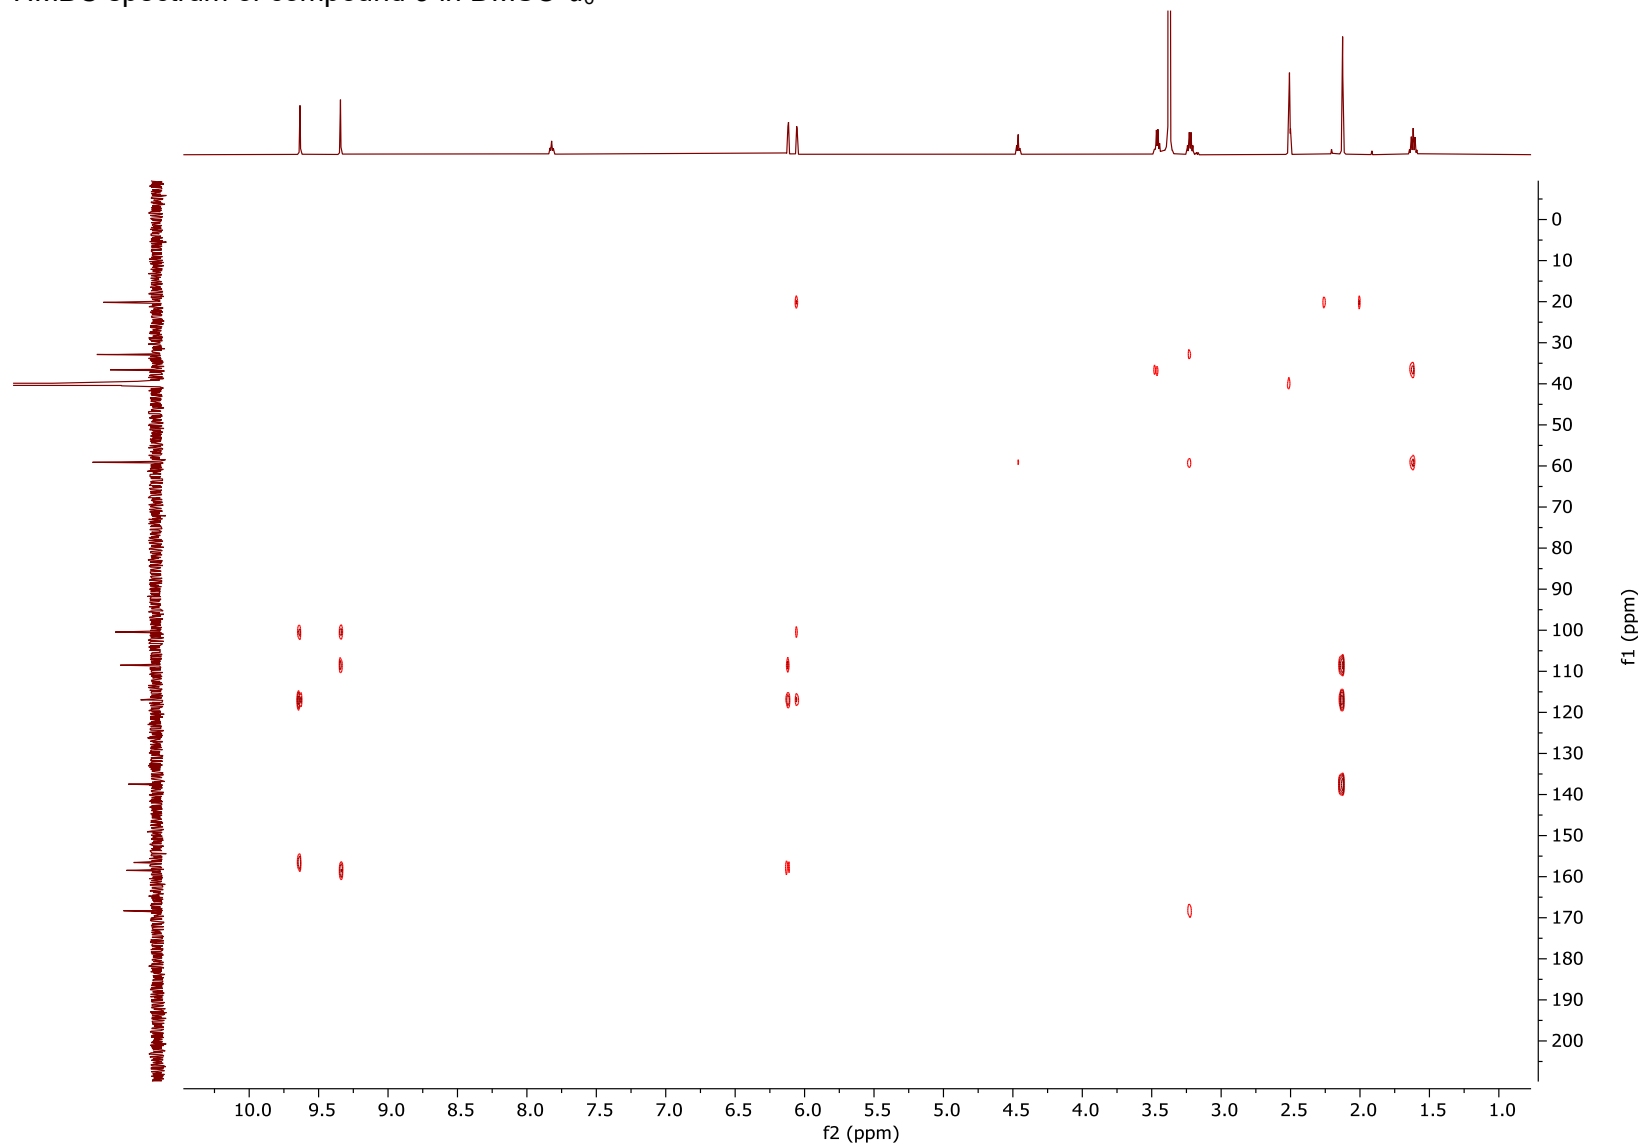

COSY spectrum of compound **9** in DMSO- $d_6$

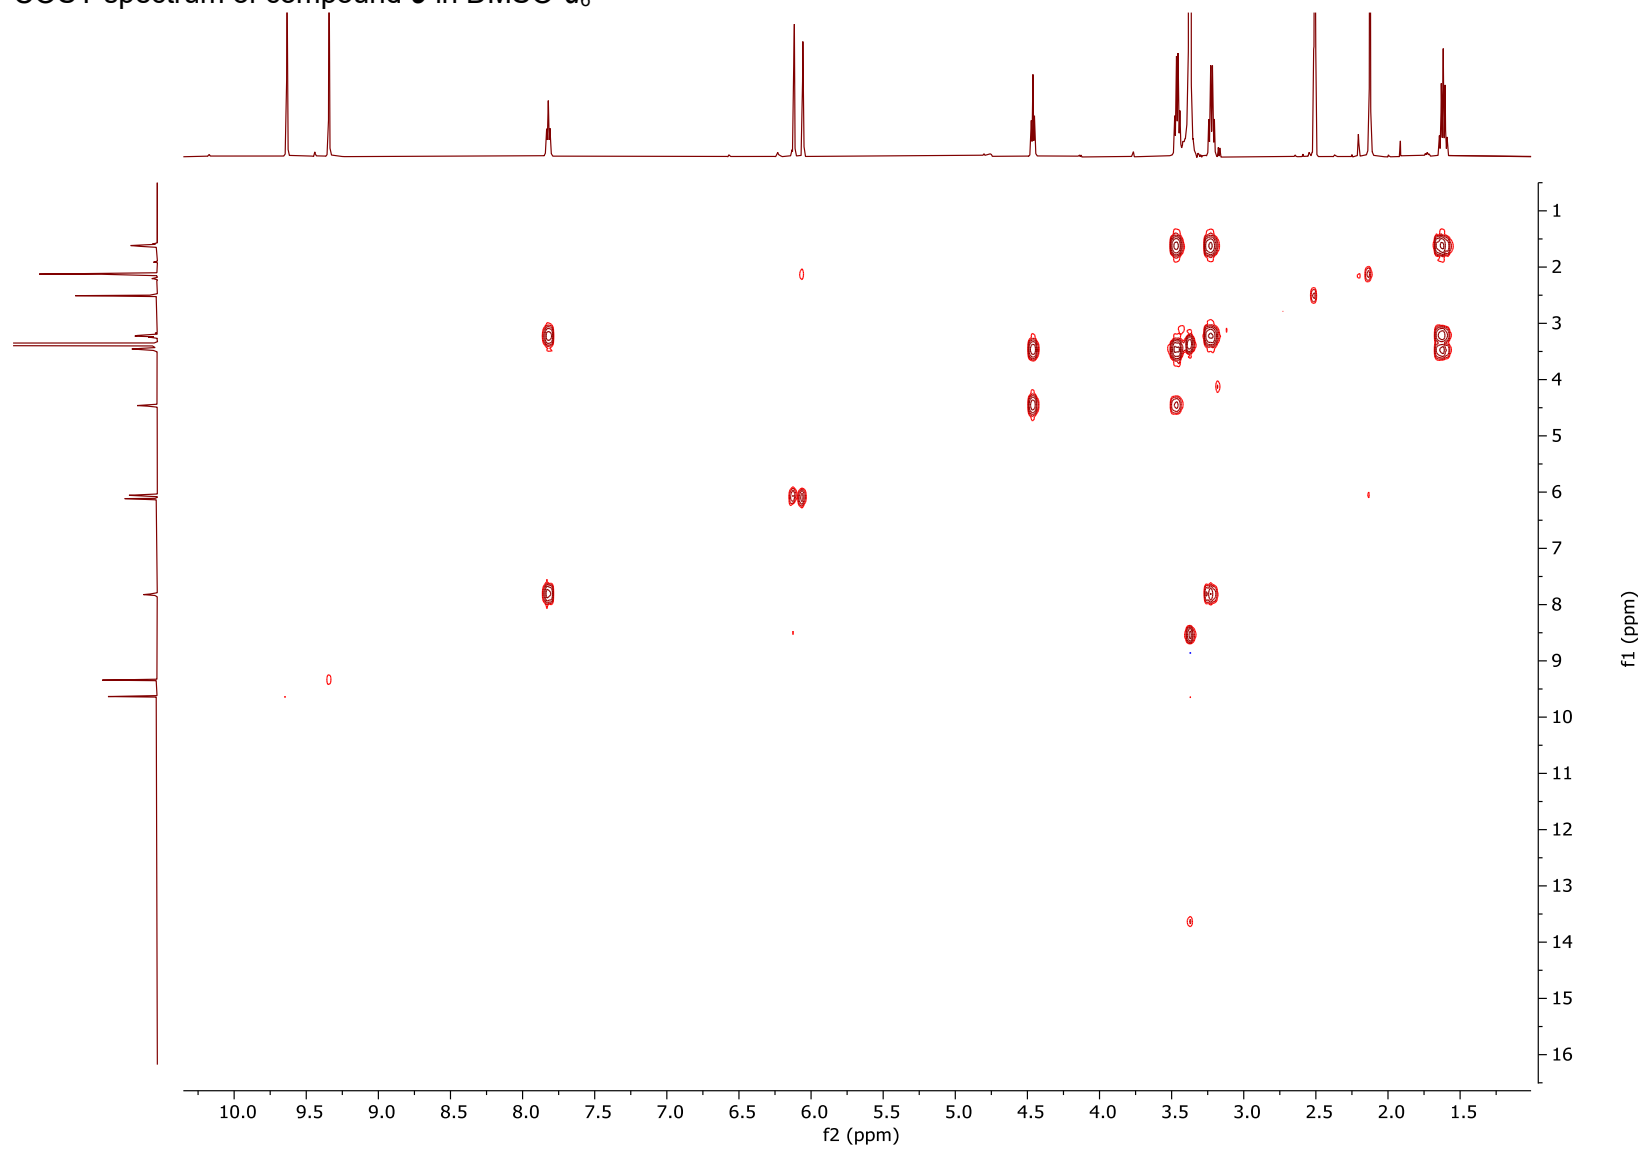

ROESY spectrum of compound **9** in DMSO-*d*<sub>6</sub>

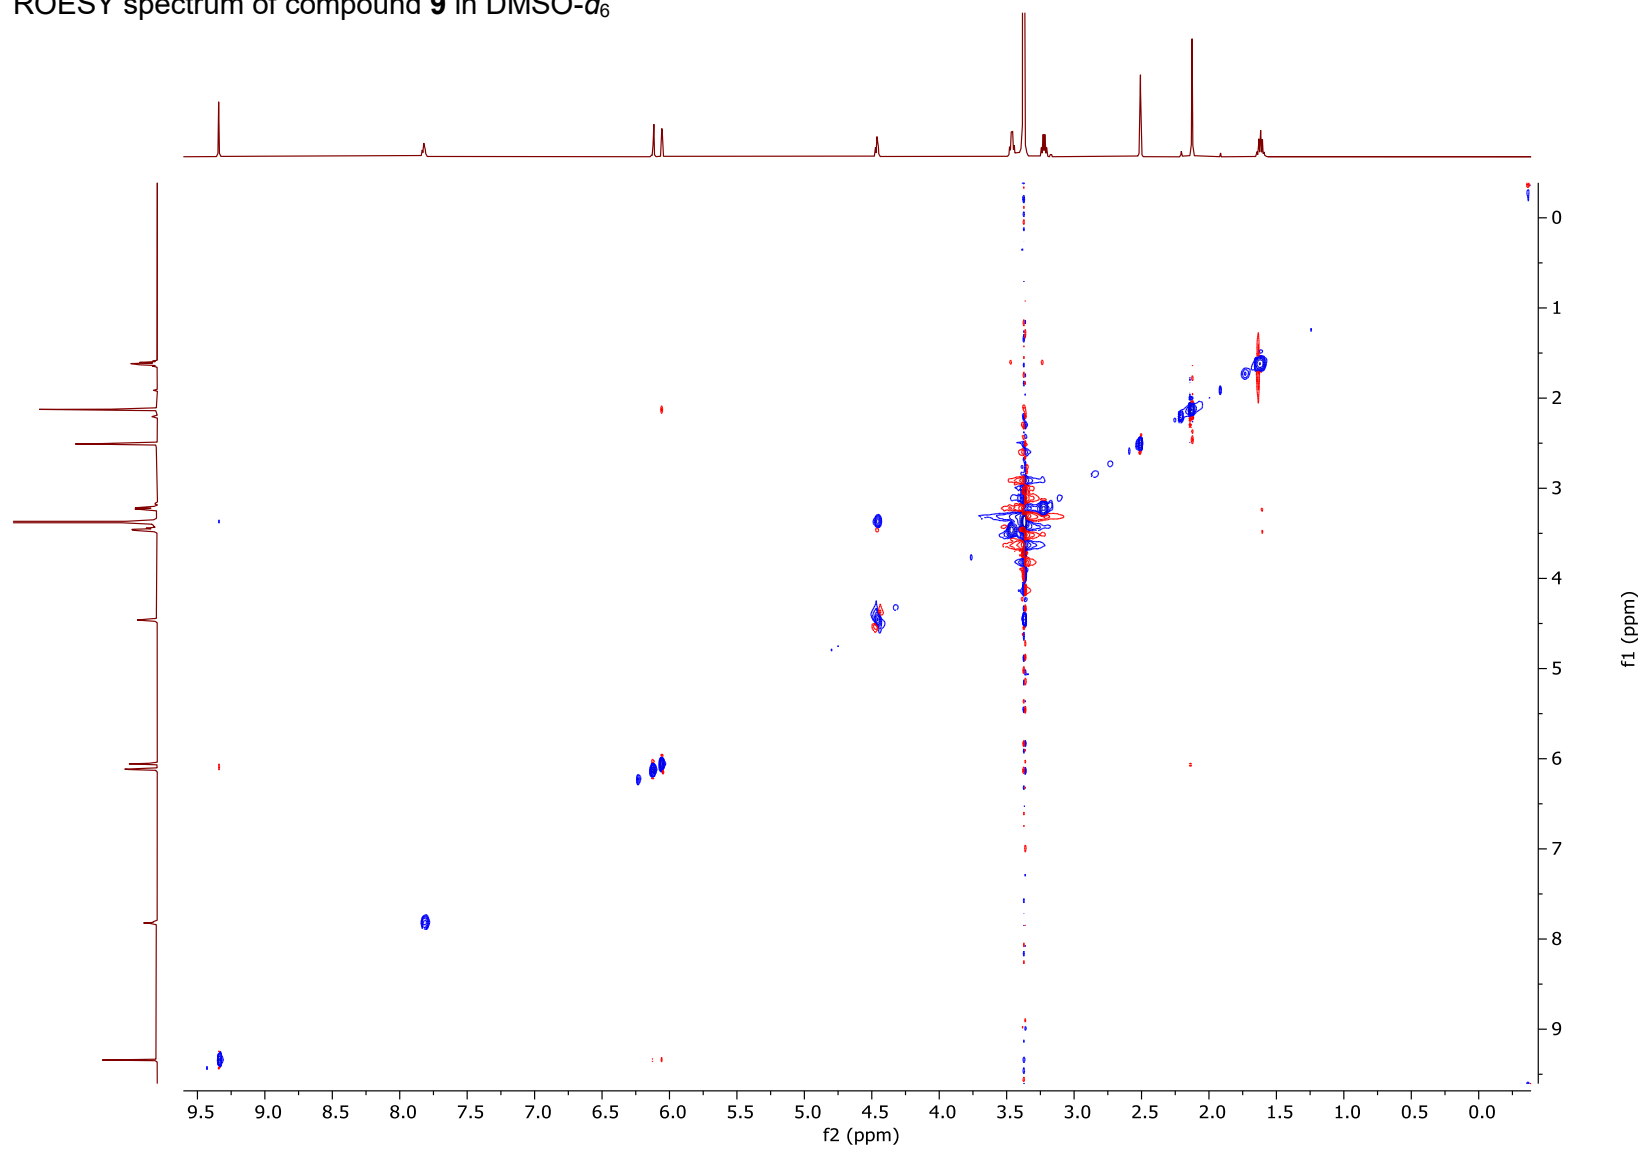

NMR data table for compound **9** in DMSO-*d*<sub>6</sub><sup>a</sup>

| Position | $\delta_{\text{H}}$ (mult., <i>J</i> in Hz) | $\delta_{\text{C}}$ , type | COSY                              | HMBC                                                  | ROESY                 |
|----------|---------------------------------------------|----------------------------|-----------------------------------|-------------------------------------------------------|-----------------------|
| 1        |                                             | 116.9, C                   |                                   |                                                       |                       |
| 2        |                                             | 156.6, C                   |                                   |                                                       |                       |
| 2-OH     | 9.63 (brs)                                  |                            |                                   | 1,2,3                                                 | 3                     |
| 3        | 6.12 (d, 2.3)                               | 100.5, CH                  | 5 <sup>w</sup> ,6-Me <sup>w</sup> | 1,2,4,5,7 <sup>w</sup>                                | 2-OH,4-OH             |
| 4        |                                             | 158.5, C                   |                                   |                                                       |                       |
| 4-OH     | 9.34 (brs)                                  |                            |                                   | 3,4,5                                                 | 3,5                   |
| 5        | 6.05 (d, 2.3)                               | 108.5, CH                  | 3,6-Me <sup>w</sup>               | 1,3,4,6-Me                                            | 4-OH,6-Me             |
| 6        |                                             | 137.5, C                   |                                   |                                                       |                       |
| 6-Me     | 2.13 (s)                                    | 20.2, CH <sub>3</sub>      | 3 <sup>w</sup> ,5 <sup>w</sup>    | 1,2 <sup>w</sup> ,3 <sup>w</sup> ,4 <sup>w</sup> ,5,6 | 5,7-NH                |
| 7        |                                             | 168.3, C                   |                                   |                                                       |                       |
| 7-NH     | 7.82 (t, 5.6)                               |                            | 8                                 | 7 <sup>w</sup>                                        | 6-Me,8                |
| 8        | 3.22 (dt, 5.6, 6.6)                         | 36.6, CH <sub>2</sub>      | 7-NH,9,10                         | 9,10                                                  | 7-NH,9 <sup>w</sup>   |
| 9        | 1.62 (tq, 6.6, 6.2)                         | 32.9, CH <sub>2</sub>      | 8,10                              | 8,10                                                  | 8,10                  |
| 10       | 3.46 (dt, 5.5, 6.2)                         | 59.1, CH <sub>2</sub>      | 9,10-OH                           | 8,9                                                   | 9 <sup>w</sup> ,10-OH |
| 10-OH    | 4.46 (t, 5.4)                               |                            | 10                                | 9 <sup>w</sup> ,10                                    | 10                    |

<sup>a</sup> Spectra recorded at 25 °C (500 MHz for <sup>1</sup>H NMR and 125 MHz for <sup>13</sup>C NMR); <sup>w</sup> Weak correlation.

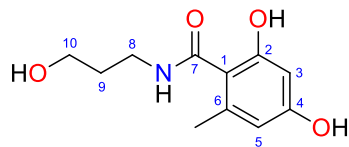

High resolution mass spectrum of compound 9

## Mass Spectrum SmartFormula Report

### Analysis Info

Analysis Name D:\Data\Sasha\20231004\RAD915H000001.d  
Method DirectInfusion\_2018\_pos.m  
Sample Name RAD915H  
Comment

Acquisition Date 10/4/2023 2:23:44 PM

Operator Demo User  
Instrument maXis II ETD

### Acquisition Parameter

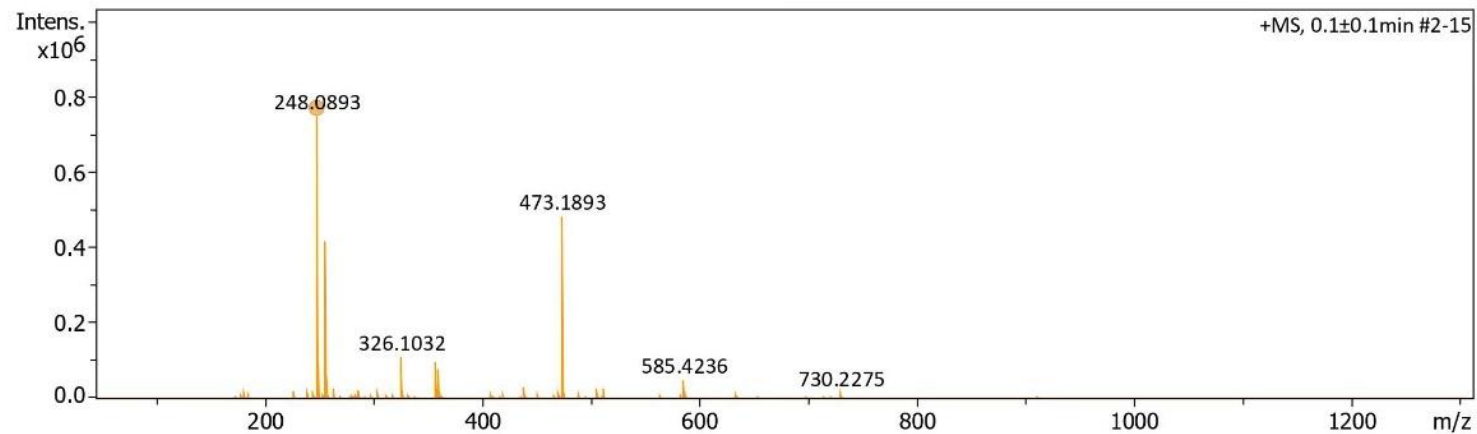

| Meas. m/z | # | Ion Formula                                       | m/z      | err [ppm] | mSigma | # mSigma | Score  | rdb | e <sup>-</sup> Conf | N-Rule |
|-----------|---|---------------------------------------------------|----------|-----------|--------|----------|--------|-----|---------------------|--------|
| 248.0893  | 1 | C <sub>11</sub> H <sub>15</sub> NNaO <sub>4</sub> | 248.0893 | -0.0      | 0.5    | 1        | 100.00 | 5.0 | even                | ok     |

<sup>1</sup>H NMR spectrum of compound **10** in DMSO-*d*<sub>6</sub>

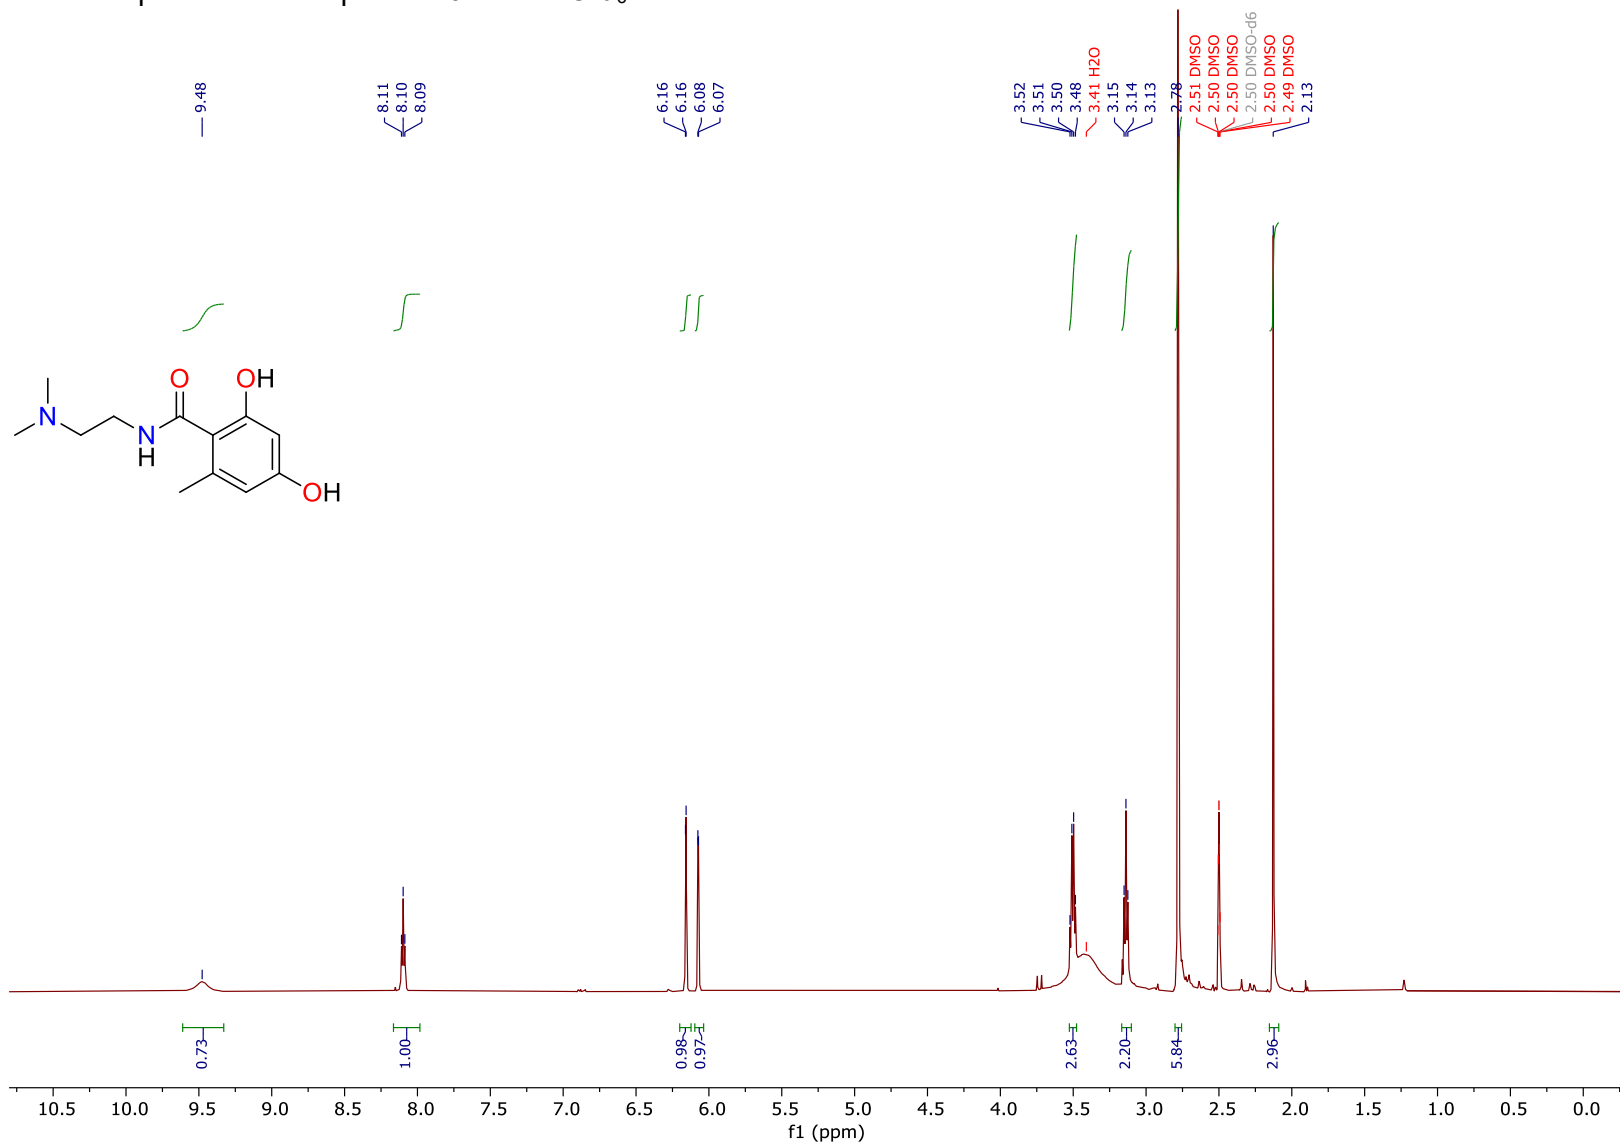

<sup>13</sup>C NMR spectrum of compound **10** in DMSO-*d*<sub>6</sub>

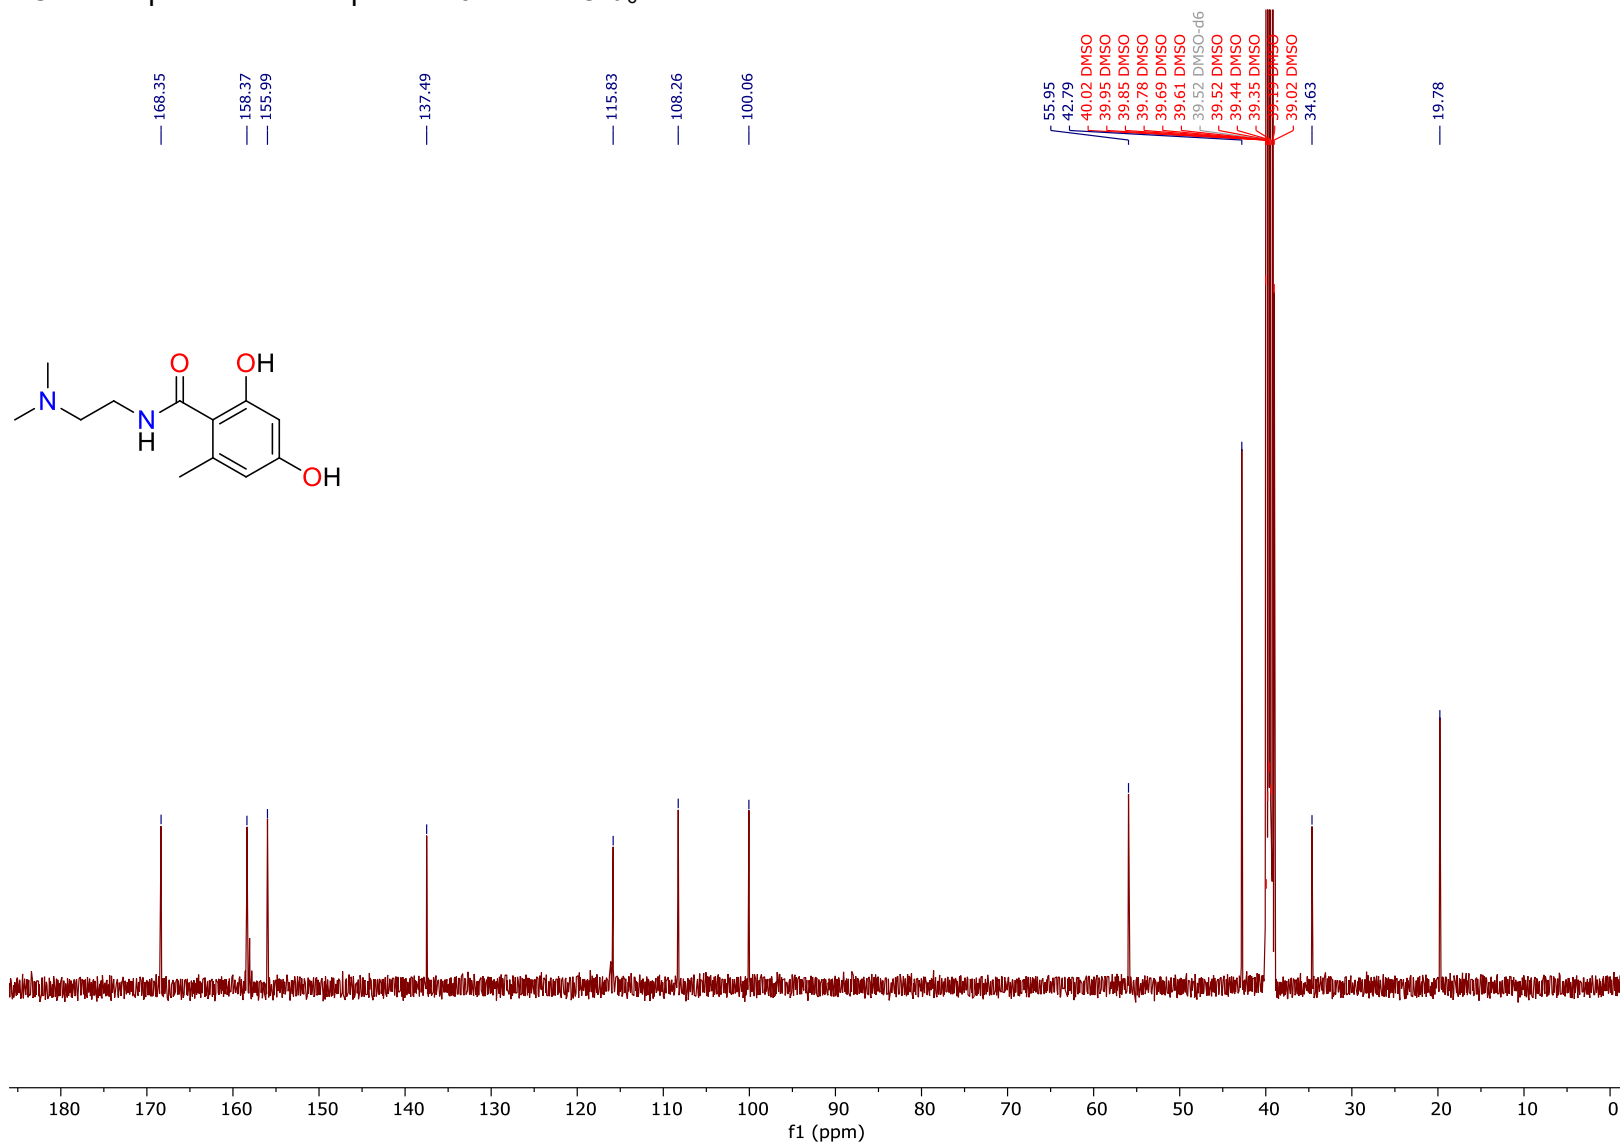

HSQC spectrum of compound **10** in DMSO- $d_6$

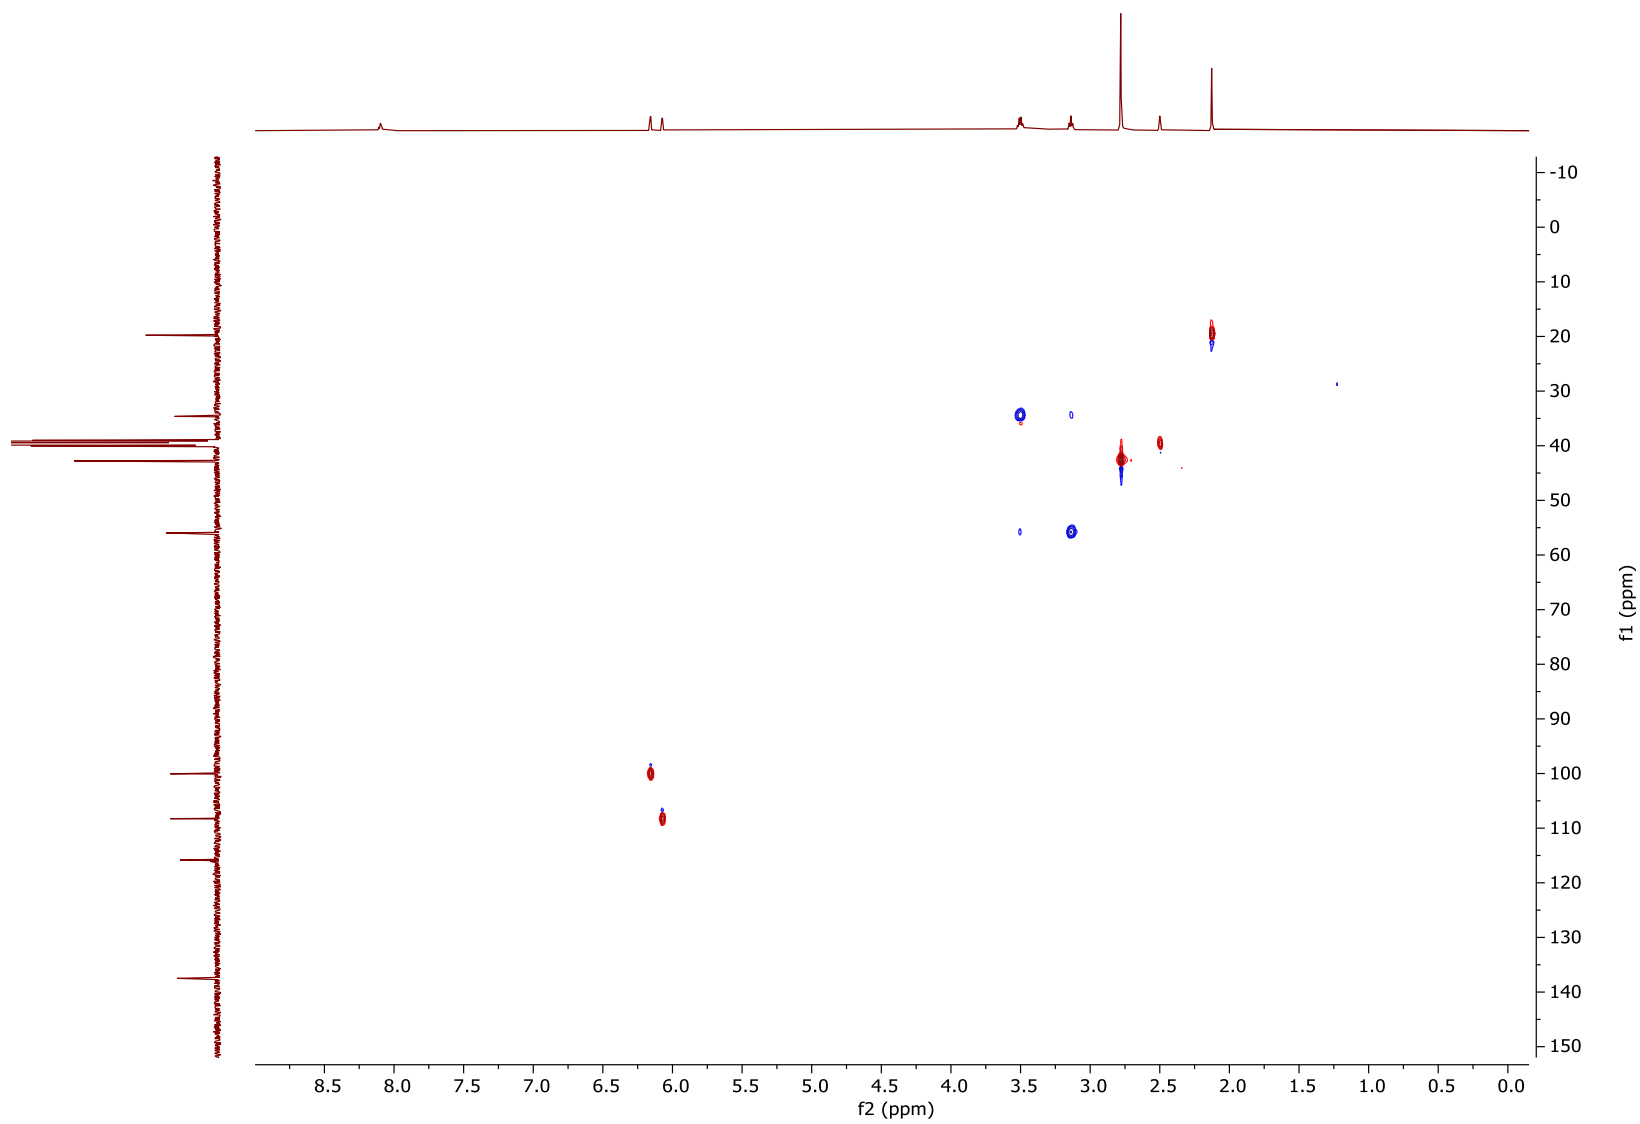

HMBC spectrum of compound **10** in DMSO- $d_6$

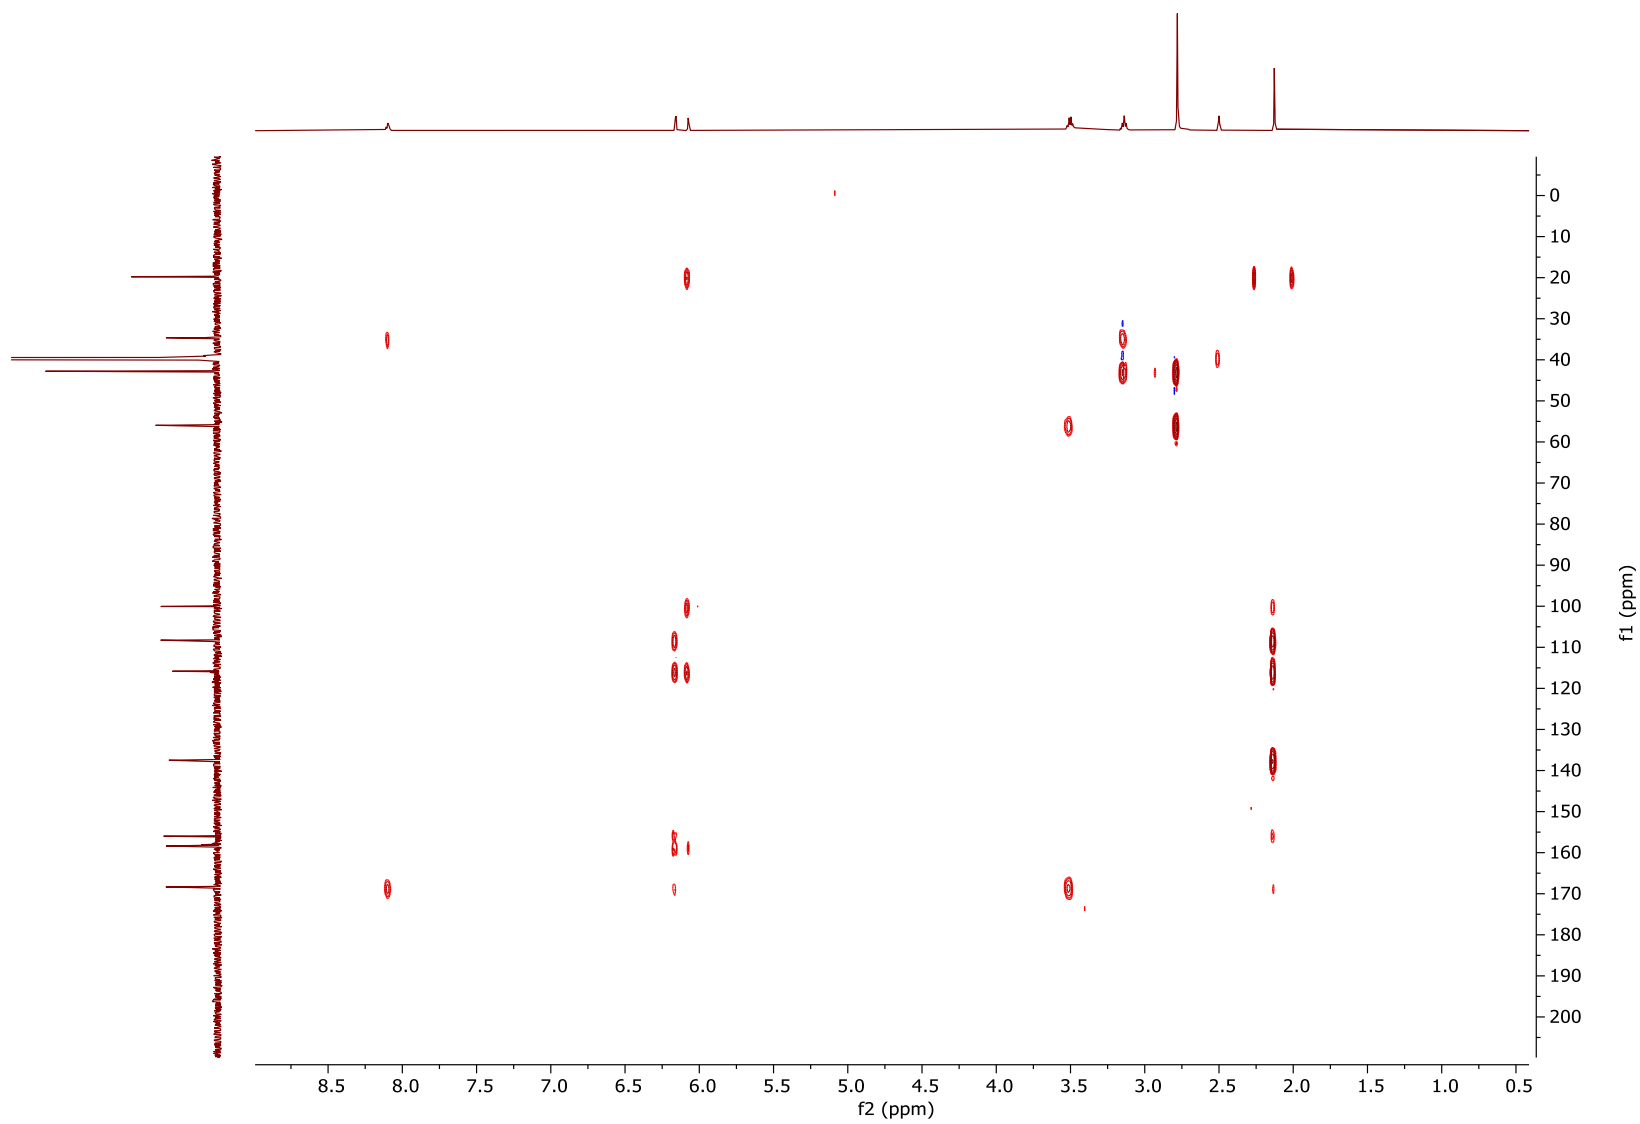

COSY spectrum of compound **10** in DMSO- $d_6$

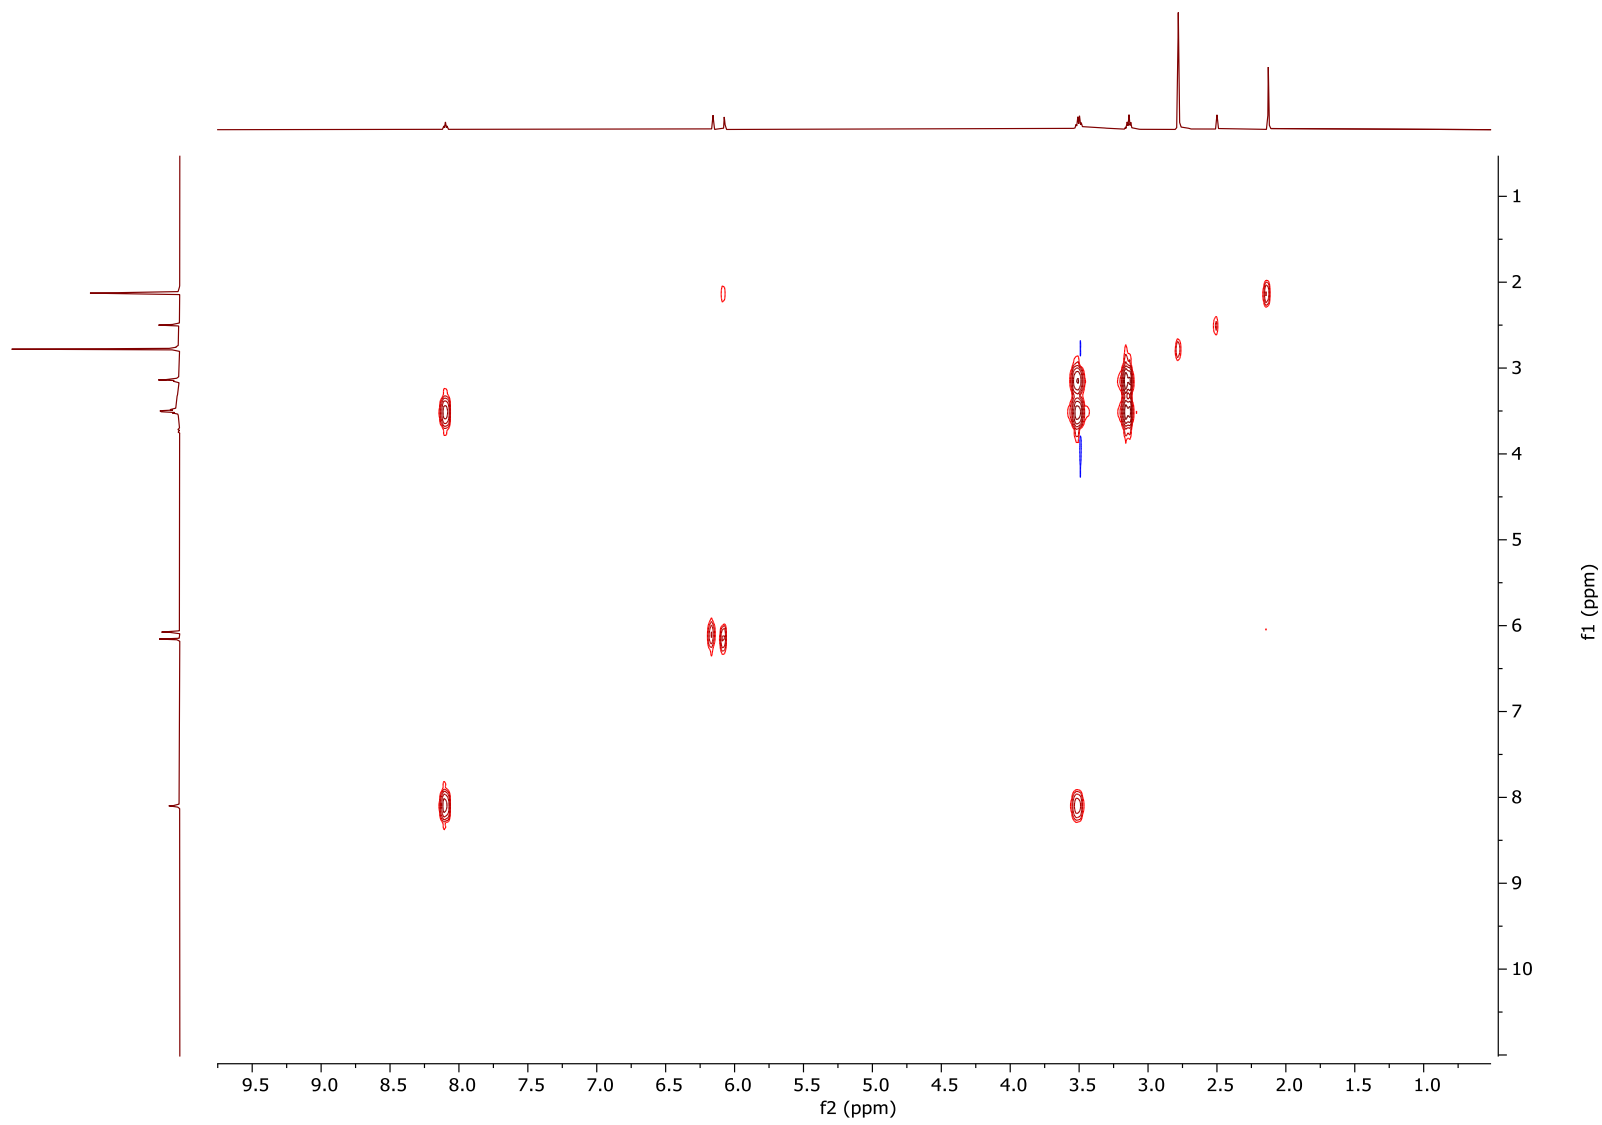

ROESY spectrum of compound **10** in DMSO- $d_6$

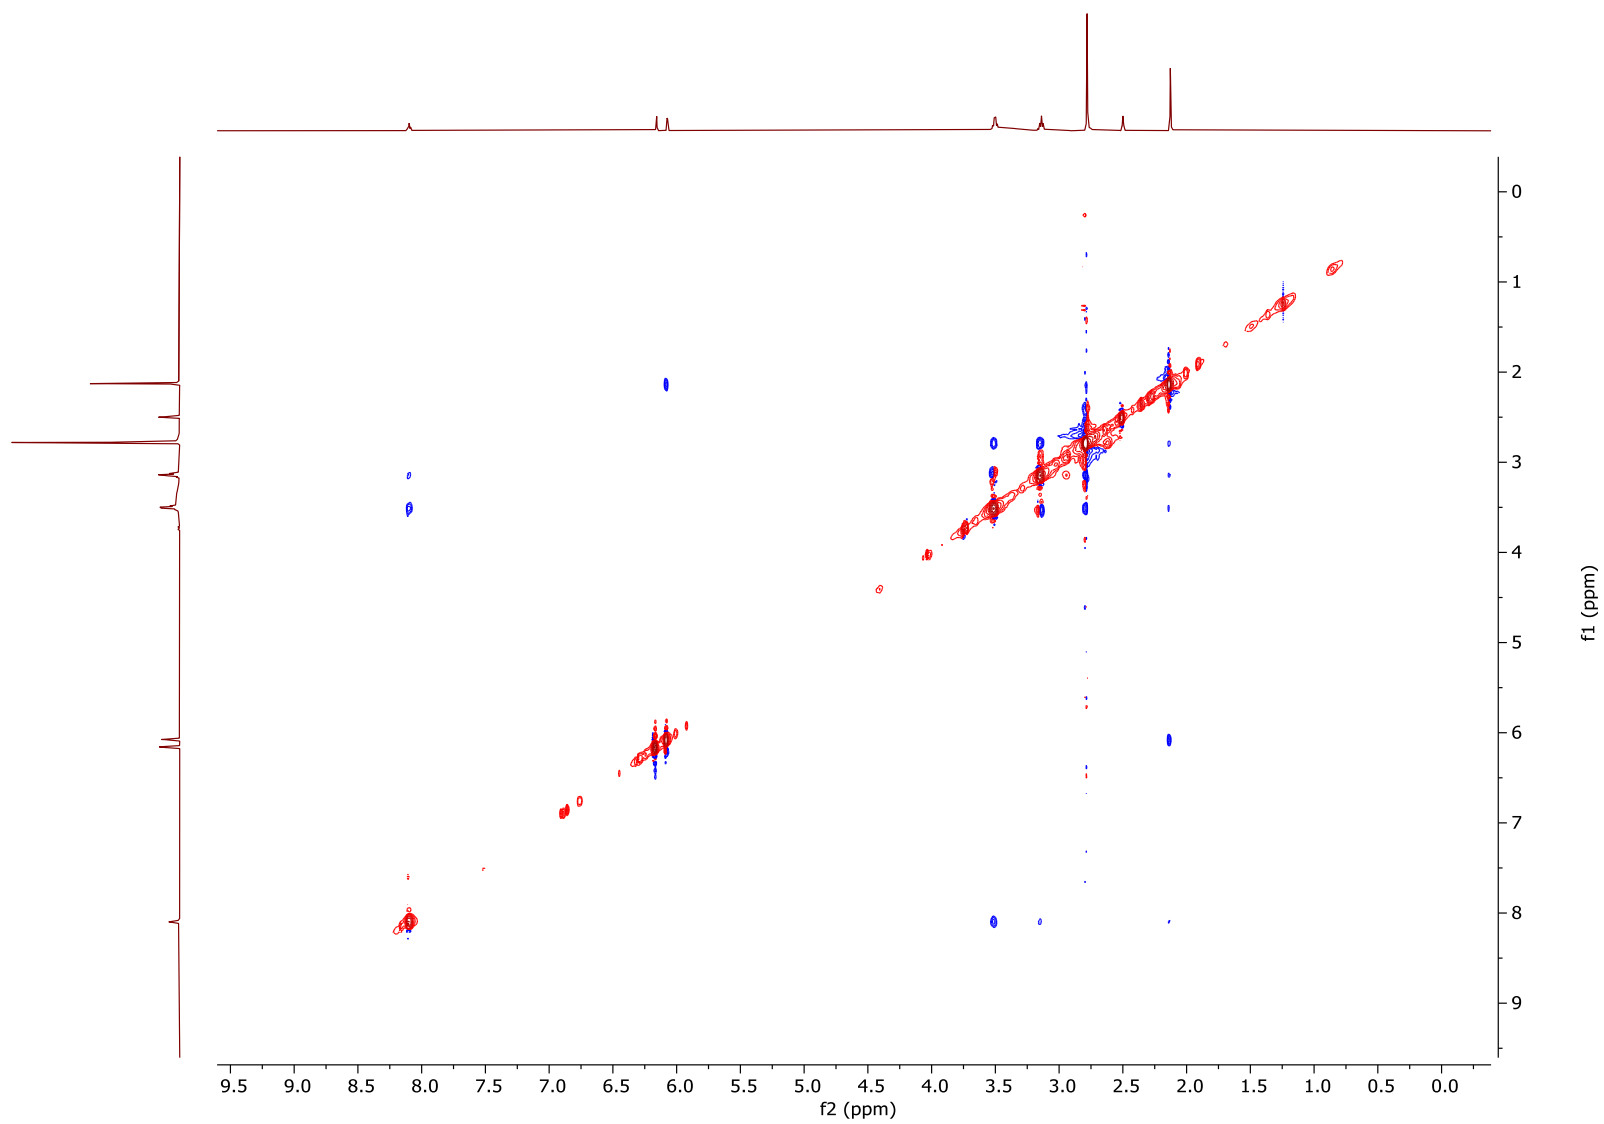

NMR data table for compound **10** in DMSO- $d_6$ <sup>a, b</sup>

| Position | $\delta_H$ (mult., $J$ in Hz) | $\delta_C$ , type     | COSY                           | HMBC                                                   | ROESY                                                                 |
|----------|-------------------------------|-----------------------|--------------------------------|--------------------------------------------------------|-----------------------------------------------------------------------|
| 1        |                               | 115.8, C              |                                |                                                        |                                                                       |
| 2        |                               | 156.0, C              |                                |                                                        |                                                                       |
| 2-OH     | <sup>c</sup>                  |                       |                                |                                                        |                                                                       |
| 3        | 6.16 (d, 2.0)                 | 100.1, CH             | 5,6-Me <sup>w</sup>            | 1,2,4,5,7 <sup>w</sup>                                 |                                                                       |
| 4        |                               | 158.4, C              |                                |                                                        |                                                                       |
| 4-OH     | 9.48 (brs)                    |                       |                                |                                                        |                                                                       |
| 5        | 6.08 (d, 2.0)                 | 108.3, CH             | 3,6-Me <sup>w</sup>            | 1,3,4,6-Me                                             | 6-Me                                                                  |
| 6        |                               | 137.5, C              |                                |                                                        |                                                                       |
| 6-Me     | 2.13 (s)                      | 19.8, CH <sub>3</sub> | 3 <sup>w</sup> ,5 <sup>w</sup> | 1,2 <sup>w</sup> ,3 <sup>w</sup> ,4,5,6,7 <sup>w</sup> | 5,7-NH,8,9                                                            |
| 7        |                               | 168.4, C              |                                |                                                        |                                                                       |
| 7-NH     | 8.10 (t, 5.6)                 |                       | 8                              | 7,8                                                    | 6-Me <sup>w</sup> ,8,9 <sup>w</sup> ,10 <sup>w</sup> ,11 <sup>w</sup> |
| 8        | 3.50 (dt, 5.6, 6.4)           | 34.6, CH <sub>2</sub> | 7-NH,9                         | 7,9                                                    | 6-Me <sup>w</sup> ,7-NH,9,10,11                                       |
| 9        | 3.14 (t, 6.4)                 | 56.0, CH <sub>2</sub> | 8                              | 8,10,11                                                | 6-Me <sup>w</sup> ,7-NH <sup>w</sup> ,8,10,11                         |
| 9-NH     | <sup>b,c</sup>                |                       |                                |                                                        |                                                                       |
| 10       | 2.78 (s)                      | 42.8, CH <sub>3</sub> |                                | 9,11                                                   | 8,9                                                                   |
| 11       | 2.78 (s)                      | 42.8, CH <sub>3</sub> |                                | 9,10                                                   | 8,9                                                                   |

<sup>a</sup> Spectra recorded at 25 °C (500 MHz for <sup>1</sup>H NMR and 125 MHz for <sup>13</sup>C NMR); <sup>b</sup> Purified as a TFA salt; <sup>c</sup> Not observed; <sup>w</sup> Weak correlation.

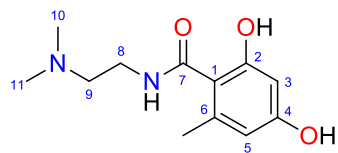

High resolution mass spectrum of compound **10**

## Mass Spectrum SmartFormula Report

### Analysis Info

Analysis Name D:\Data\Sasha\20231004\RAD915E000001.d  
Method DirectInfusion\_2018\_pos.m  
Sample Name RAD915E  
Comment

Acquisition Date 10/4/2023 2:12:02 PM

Operator Demo User  
Instrument maXis II ETD

### Acquisition Parameter

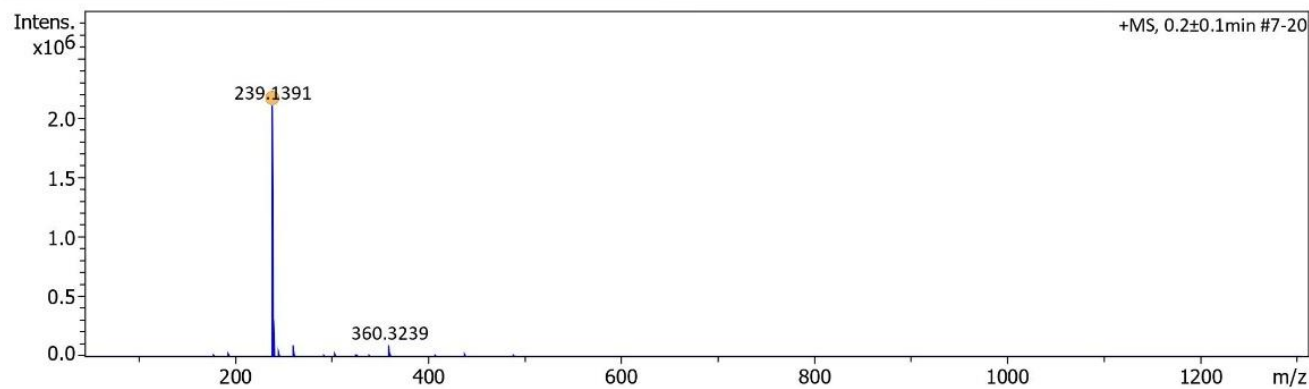

| Meas. m/z | # | Ion Formula                                                   | m/z      | err [ppm] | mSigma | # mSigma | Score  | rdb | e <sup>-</sup> Conf | N-Rule |
|-----------|---|---------------------------------------------------------------|----------|-----------|--------|----------|--------|-----|---------------------|--------|
| 239.1391  | 1 | C <sub>12</sub> H <sub>19</sub> N <sub>2</sub> O <sub>3</sub> | 239.1390 | -0.4      | 3.4    | 1        | 100.00 | 5.0 | even                | ok     |

<sup>1</sup>H NMR spectrum of compound **11** in DMSO-*d*<sub>6</sub>

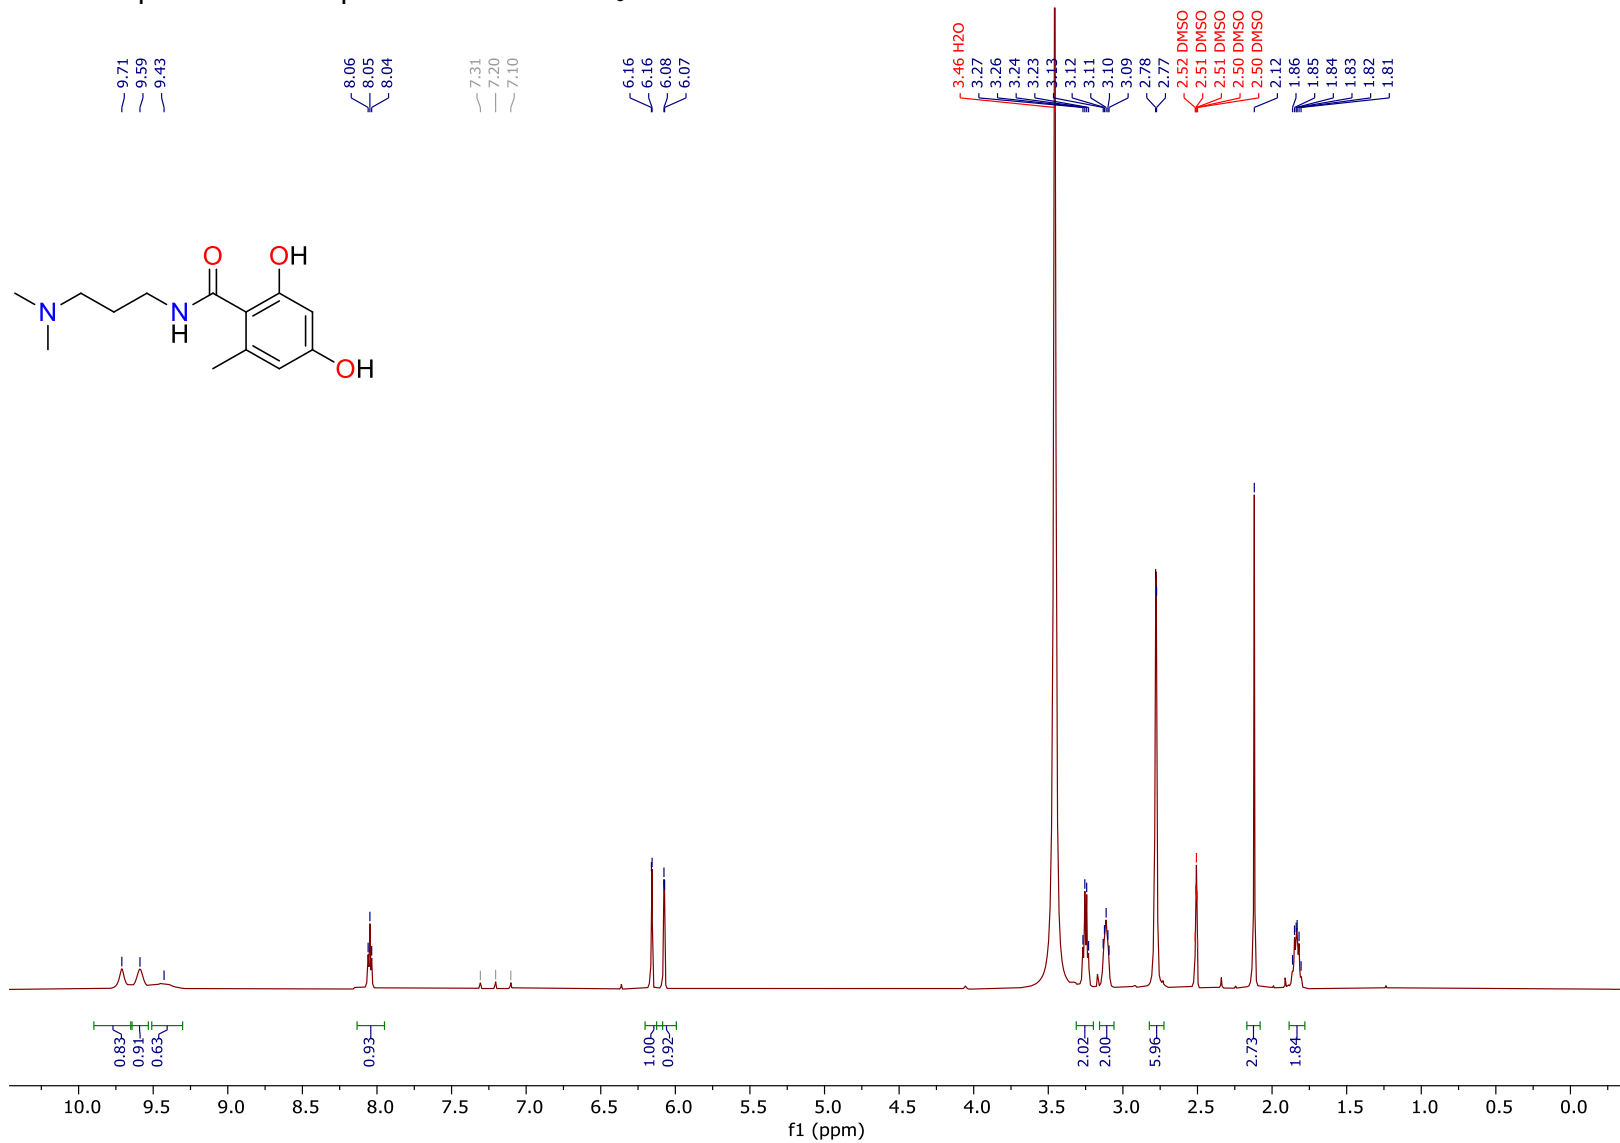

<sup>13</sup>C NMR spectrum of compound **11** in DMSO-*d*<sub>6</sub>

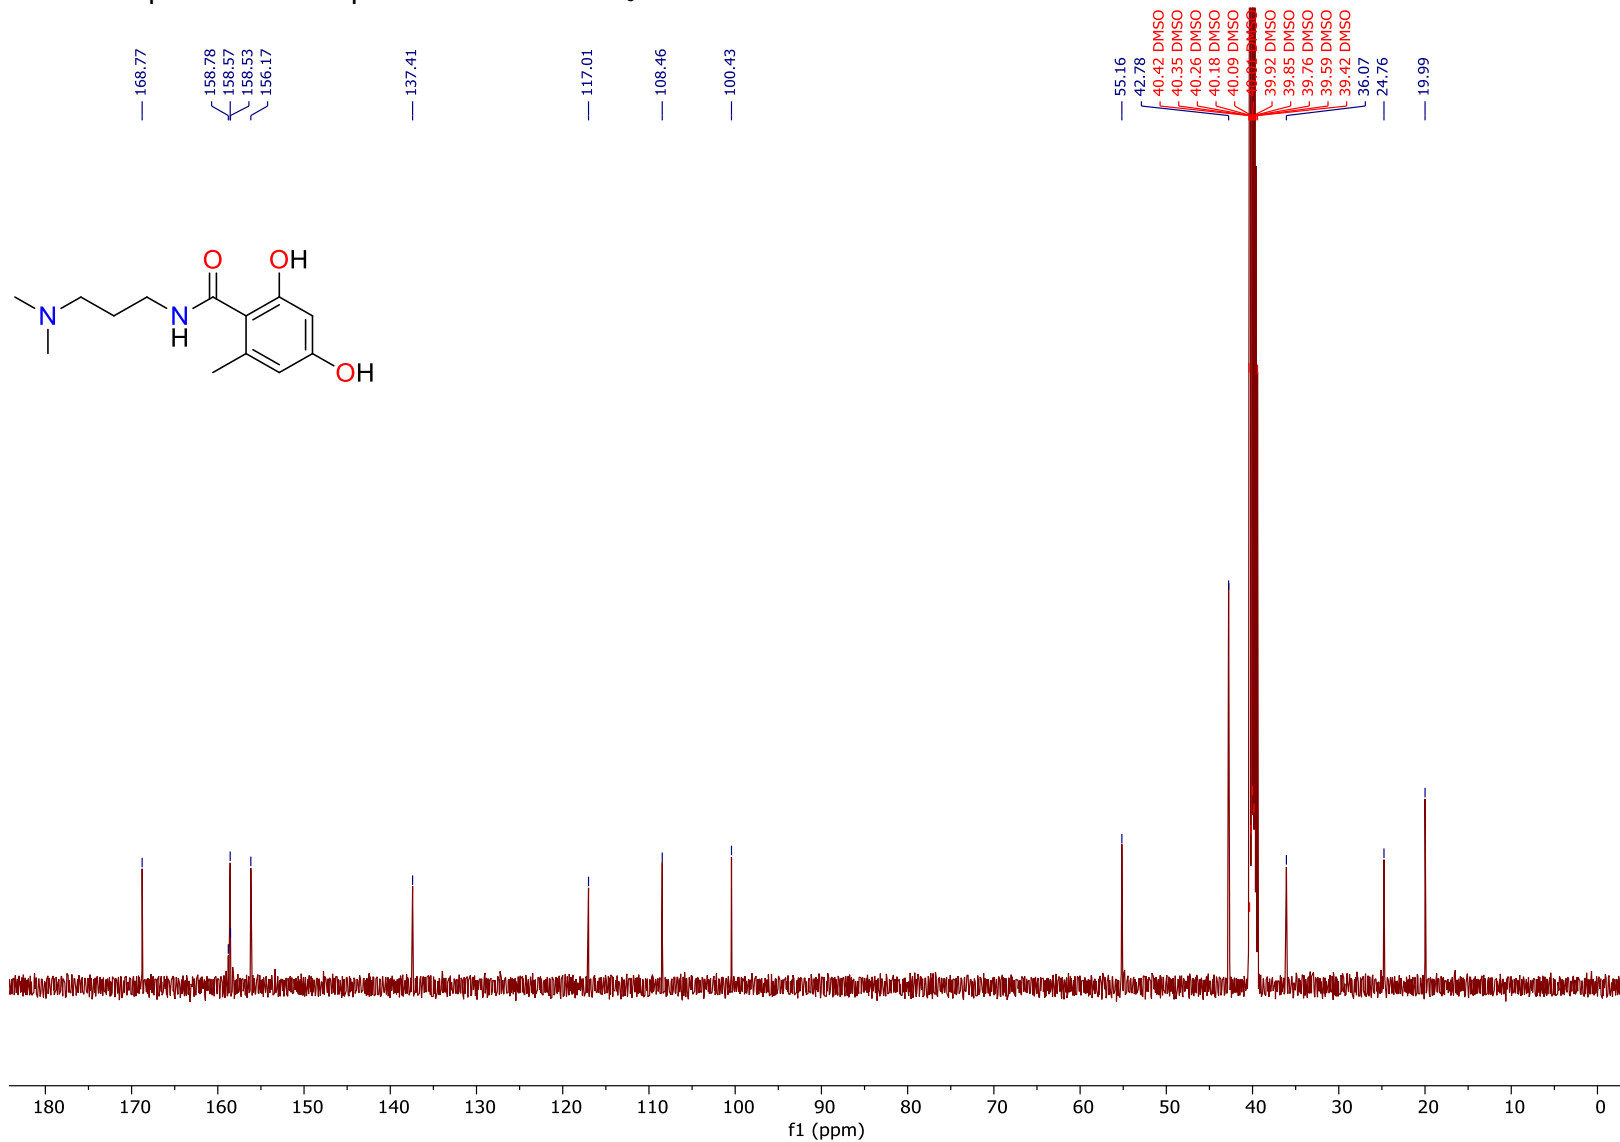

HSQC spectrum of compound **11** in DMSO-*d*<sub>6</sub>

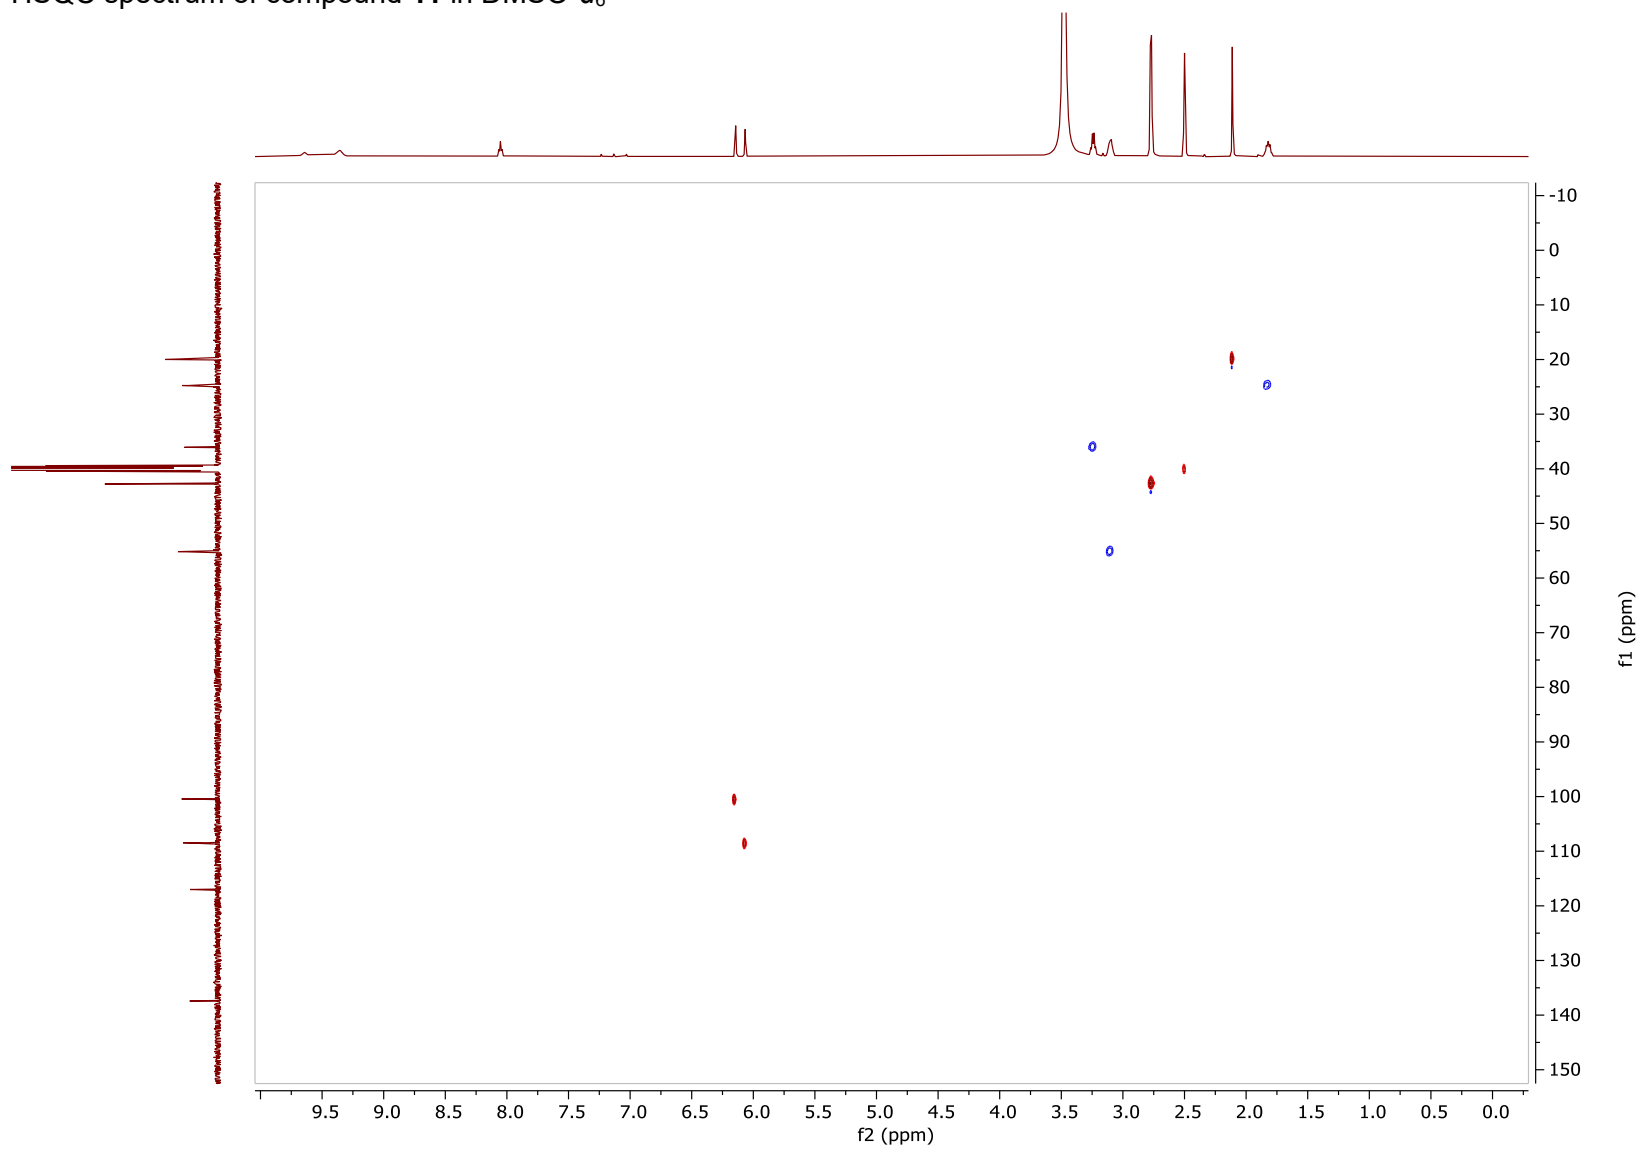

HMBC spectrum of compound **11** in DMSO-*d*<sub>6</sub>

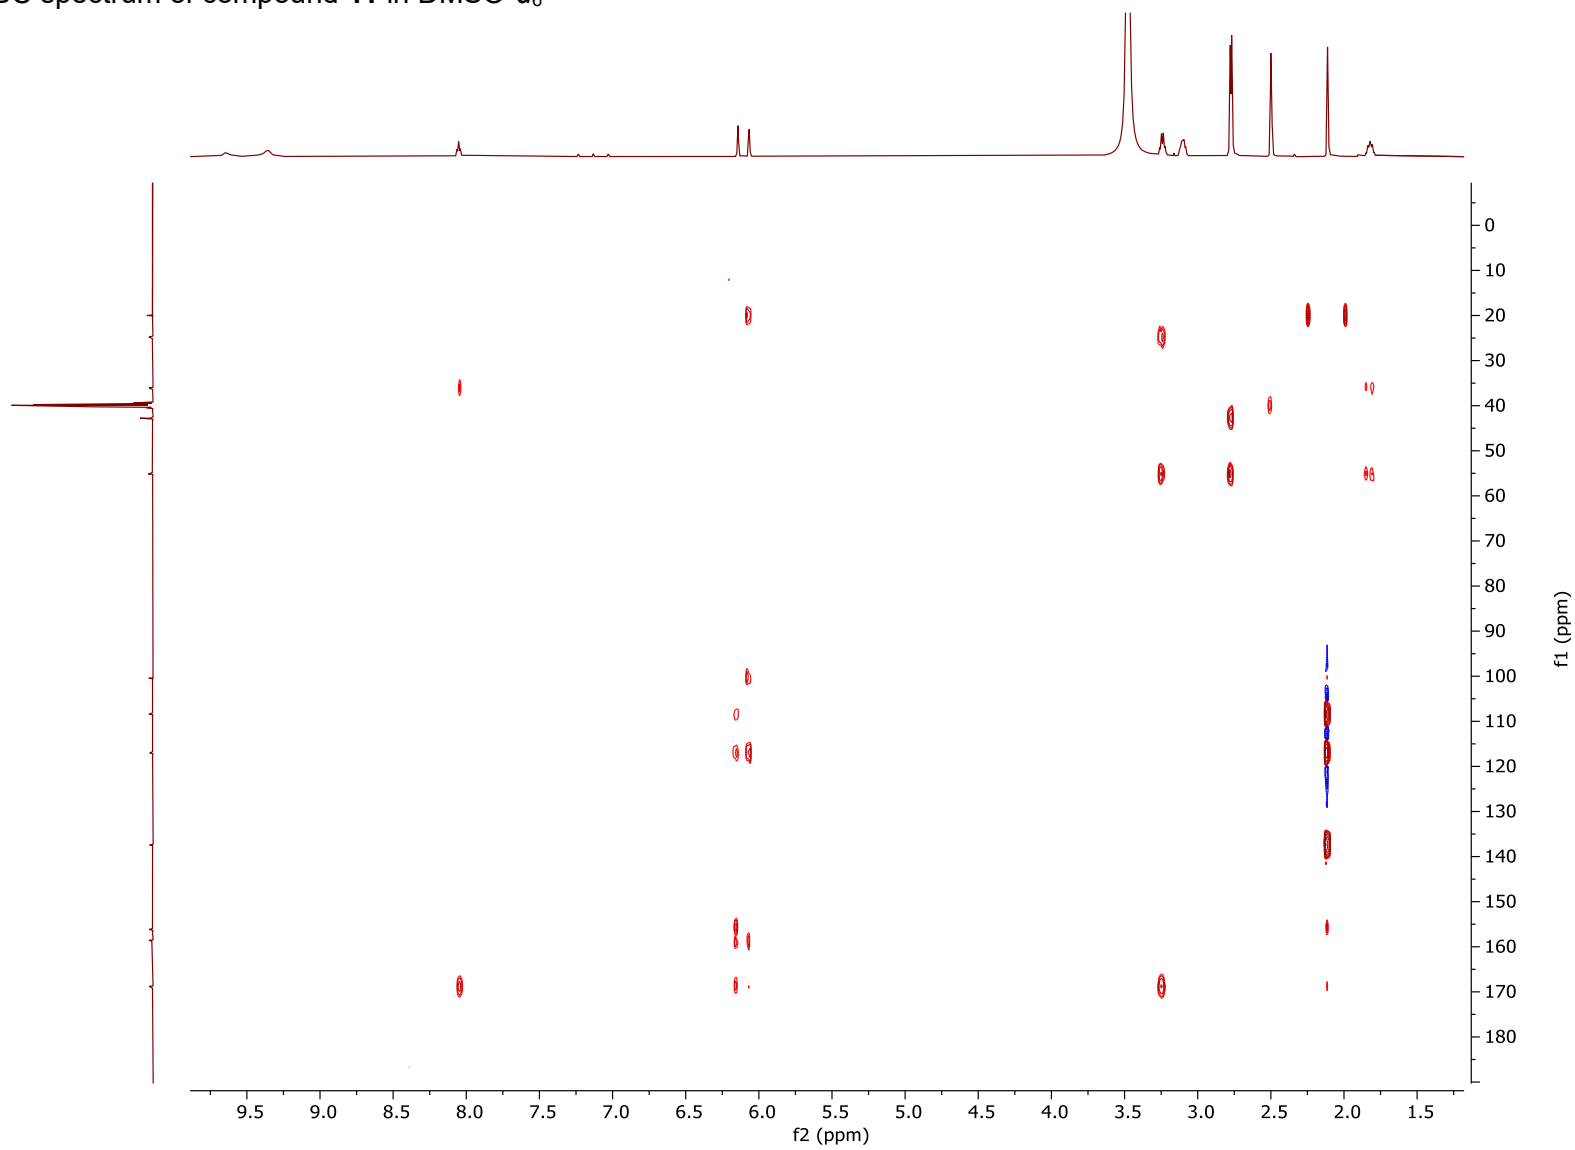

COSY spectrum of compound **11** in DMSO- $d_6$

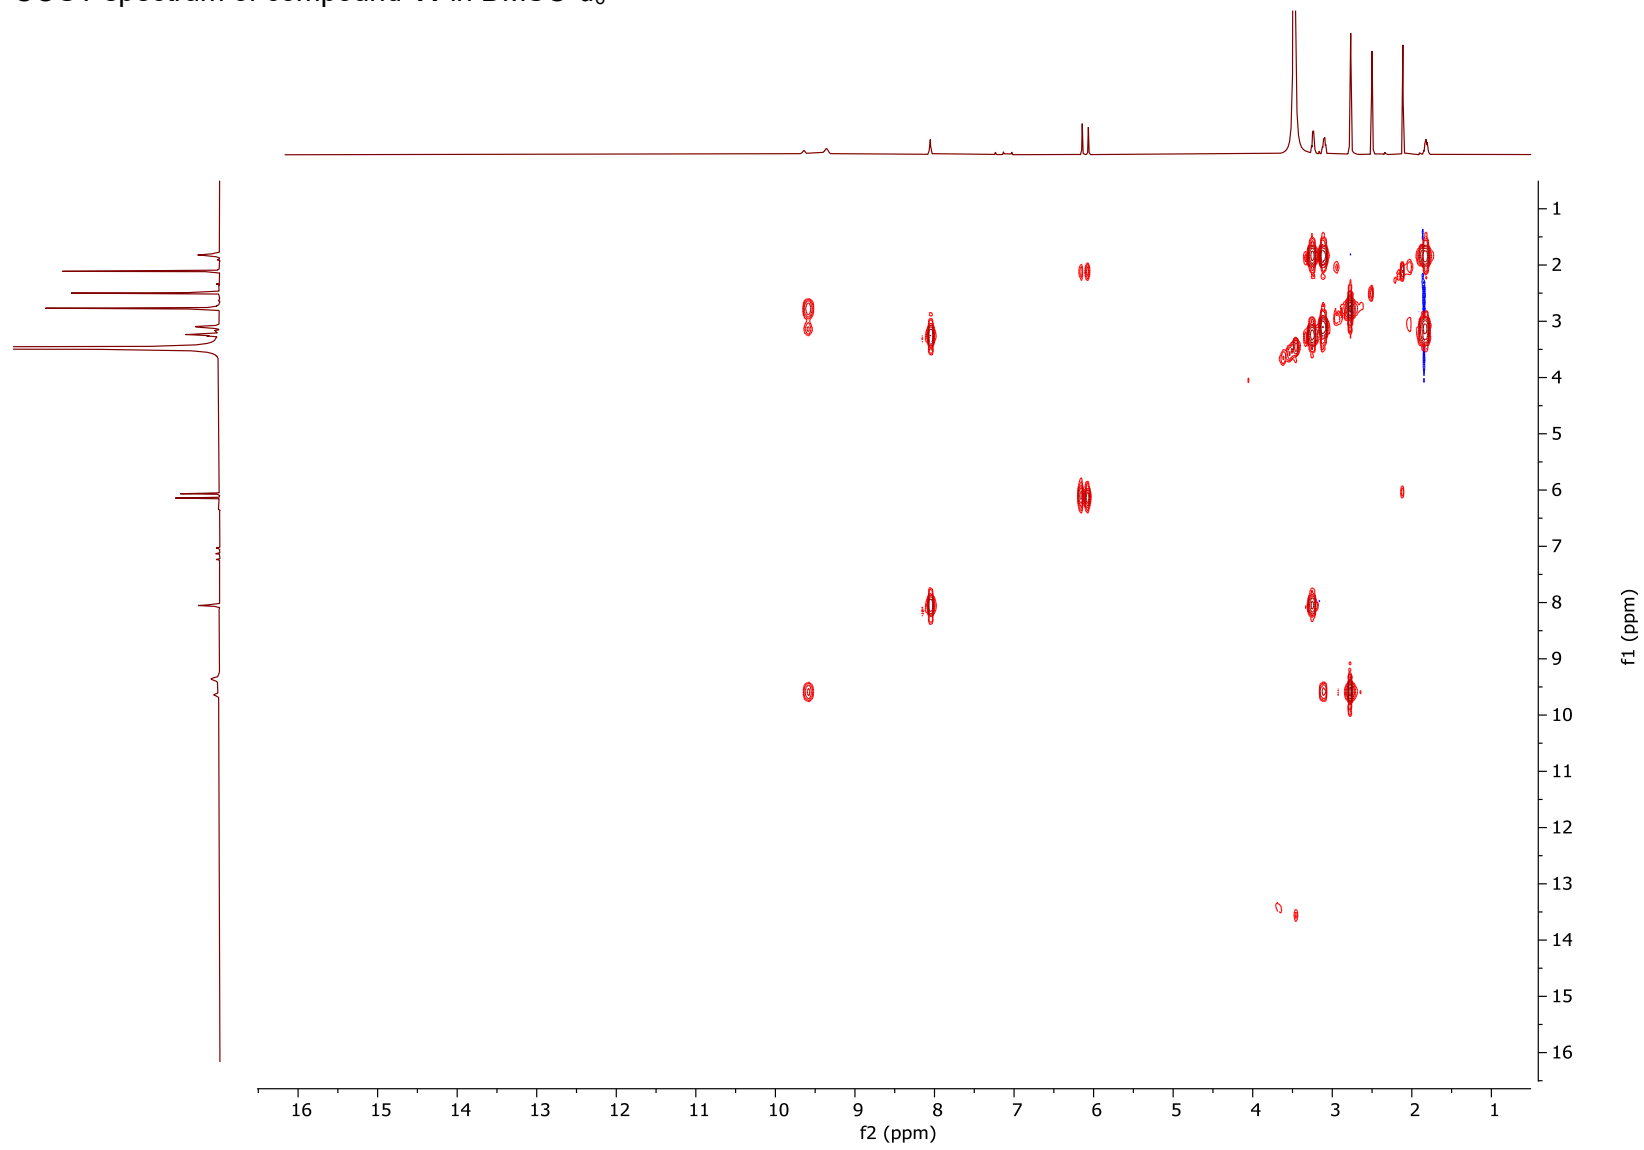

ROESY spectrum of compound **11** in DMSO- $d_6$

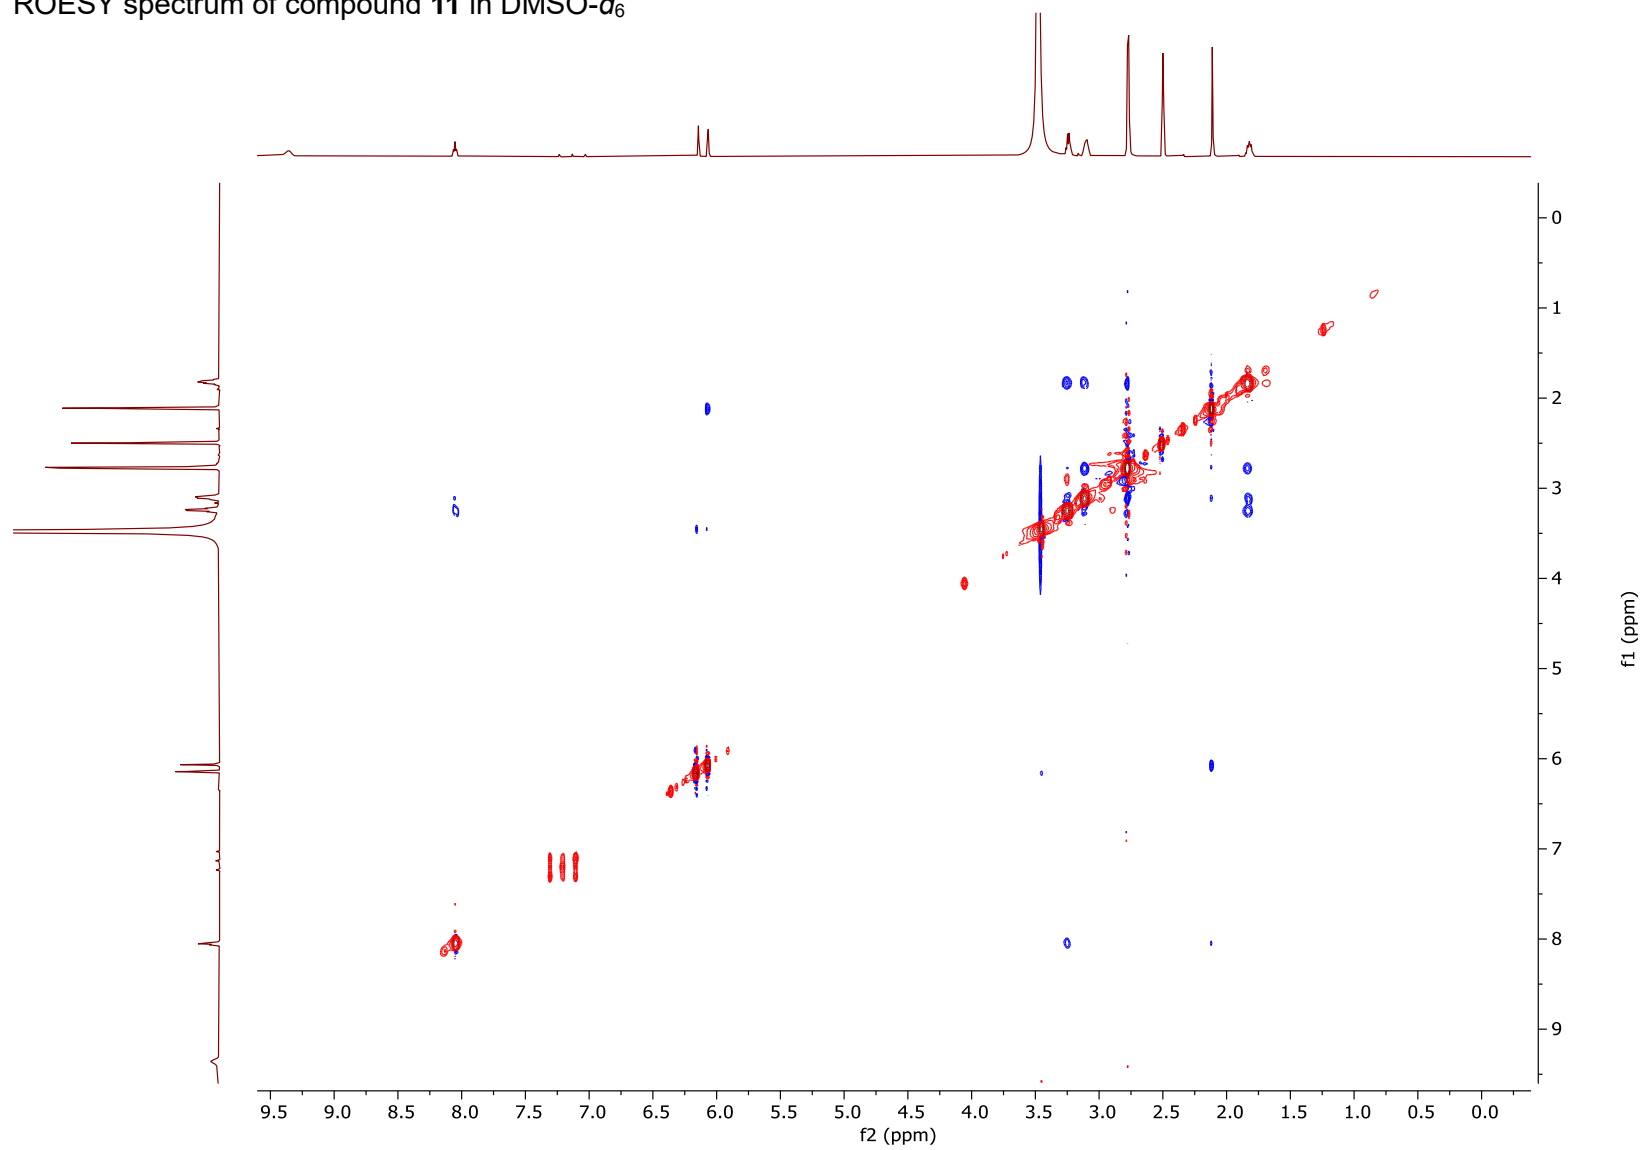

NMR data table for compound **11** in DMSO-*d*<sub>6</sub><sup>a, b</sup>

| Position | $\delta_{\text{H}}$ (mult., <i>J</i> in Hz) | $\delta_{\text{C}}$ , type | COSY                           | HMBC                                                 | ROESY                                                                      |
|----------|---------------------------------------------|----------------------------|--------------------------------|------------------------------------------------------|----------------------------------------------------------------------------|
| 1        |                                             | 117.0, C                   |                                |                                                      |                                                                            |
| 2        |                                             | 156.2, C                   |                                |                                                      |                                                                            |
| 2-OH     | 9.71 (brs)                                  |                            | 8,10,11,12                     |                                                      |                                                                            |
| 3        | 6.16 (d, 2.1)                               | 100.4, CH                  | 5,6-Me <sup>w</sup>            | 1,2,4,5,7 <sup>w</sup>                               |                                                                            |
| 4        |                                             | 158.6, C                   |                                |                                                      |                                                                            |
| 4-OH     | 9.43 (brs)                                  |                            |                                |                                                      |                                                                            |
| 5        | 6.07 (d, 2.1)                               | 108.5, CH                  | 3,6-Me <sup>w</sup>            | 1,3,4 <sup>w</sup> ,6-Me,7 <sup>w</sup>              | 6-Me                                                                       |
| 6        |                                             | 137.4, C                   |                                |                                                      |                                                                            |
| 6-Me     | 2.12 (s)                                    | 20.0, CH <sub>3</sub>      | 3 <sup>w</sup> ,5 <sup>w</sup> | 1,2 <sup>w</sup> ,3 <sup>w</sup> ,5,6,7 <sup>w</sup> | 5,7-NH                                                                     |
| 7        |                                             | 168.8, C                   |                                |                                                      |                                                                            |
| 7-NH     | 8.05 (t, 5.8)                               |                            | 8                              | 7,8 <sup>w</sup>                                     | 6-Me <sup>w</sup> ,8,9,10 <sup>w</sup>                                     |
| 8        | 3.25 (dt, 5.8, 6.2)                         | 36.1, CH <sub>2</sub>      | 7-NH,9                         | 7,9,10                                               | 7-NH,9,10                                                                  |
| 9        | 1.83 (dt, 6.2, 5.6)                         | 24.8, CH <sub>2</sub>      | 8,10                           | 8 <sup>w</sup> ,10 <sup>w</sup>                      | 7-NH <sup>w</sup> ,8,10,11 <sup>w</sup> ,12 <sup>w</sup>                   |
| 10       | 3.11 (tt, 5.6, 5.4)                         | 55.2, CH <sub>2</sub>      | 9,10-NH                        |                                                      | 6-Me <sup>w</sup> ,7-NH <sup>w</sup> ,8,9,11 <sup>w</sup> ,12 <sup>w</sup> |
| 10-NH    | 9.59 (brs) <sup>b</sup>                     |                            | 10,11,12                       |                                                      |                                                                            |
| 11       | 2.78 (s)                                    | 42.8, CH <sub>3</sub>      | 10-NH                          | 10,12                                                | 9,10                                                                       |
| 12       | 2.77 (s)                                    | 42.8, CH <sub>3</sub>      | 10-NH                          | 10,11                                                | 9,10                                                                       |

<sup>a</sup> Spectra recorded at 25 °C (500 MHz for <sup>1</sup>H NMR and 125 MHz for <sup>13</sup>C NMR); <sup>b</sup> Purified as a TFA salt; <sup>w</sup> Weak correlation.

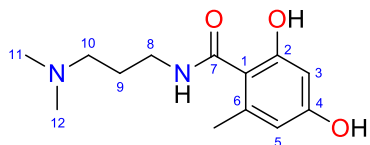

# High resolution mass spectrum of compound 11

## Mass Spectrum SmartFormula Report

### Analysis Info

Analysis Name D:\Data\Sasha\20231004\RAD915J000002.d  
Method DirectInfusion\_2018\_pos.m  
Sample Name RAD915J  
Comment

Acquisition Date 10/4/2023 2:59:16 PM

Operator Demo User  
Instrument maXis II ETD

### Acquisition Parameter

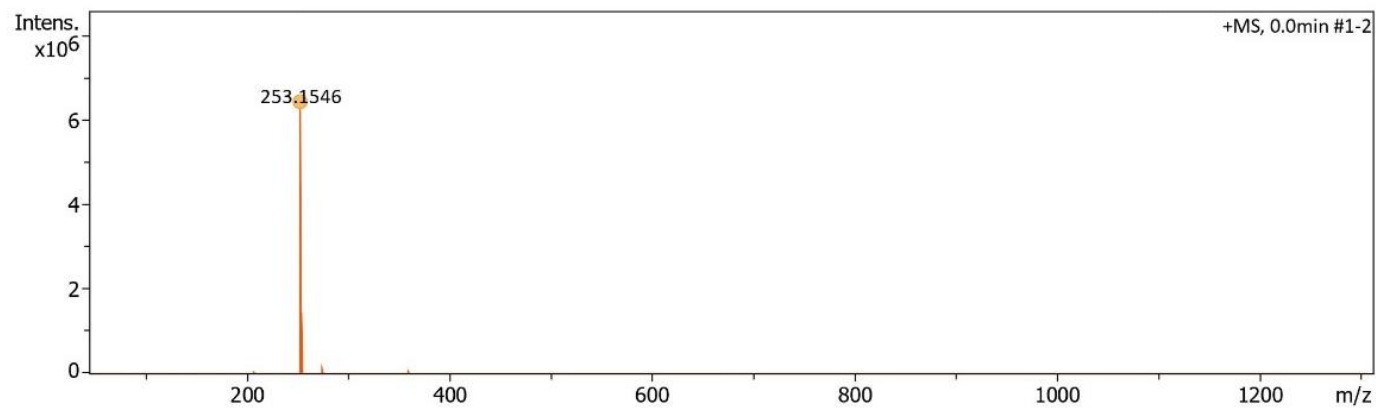

| Meas. m/z | # | Ion Formula | m/z      | err [ppm] | mSigma | # mSigma | Score  | rdb | e <sup>-</sup> Conf | N-Rule |
|-----------|---|-------------|----------|-----------|--------|----------|--------|-----|---------------------|--------|
| 253.1546  | 1 | C13H21N2O3  | 253.1547 | 0.1       | 48.6   | 1        | 100.00 | 5.0 | even                | ok     |

<sup>1</sup>H NMR spectrum of compound **12** in DMSO-*d*<sub>6</sub>

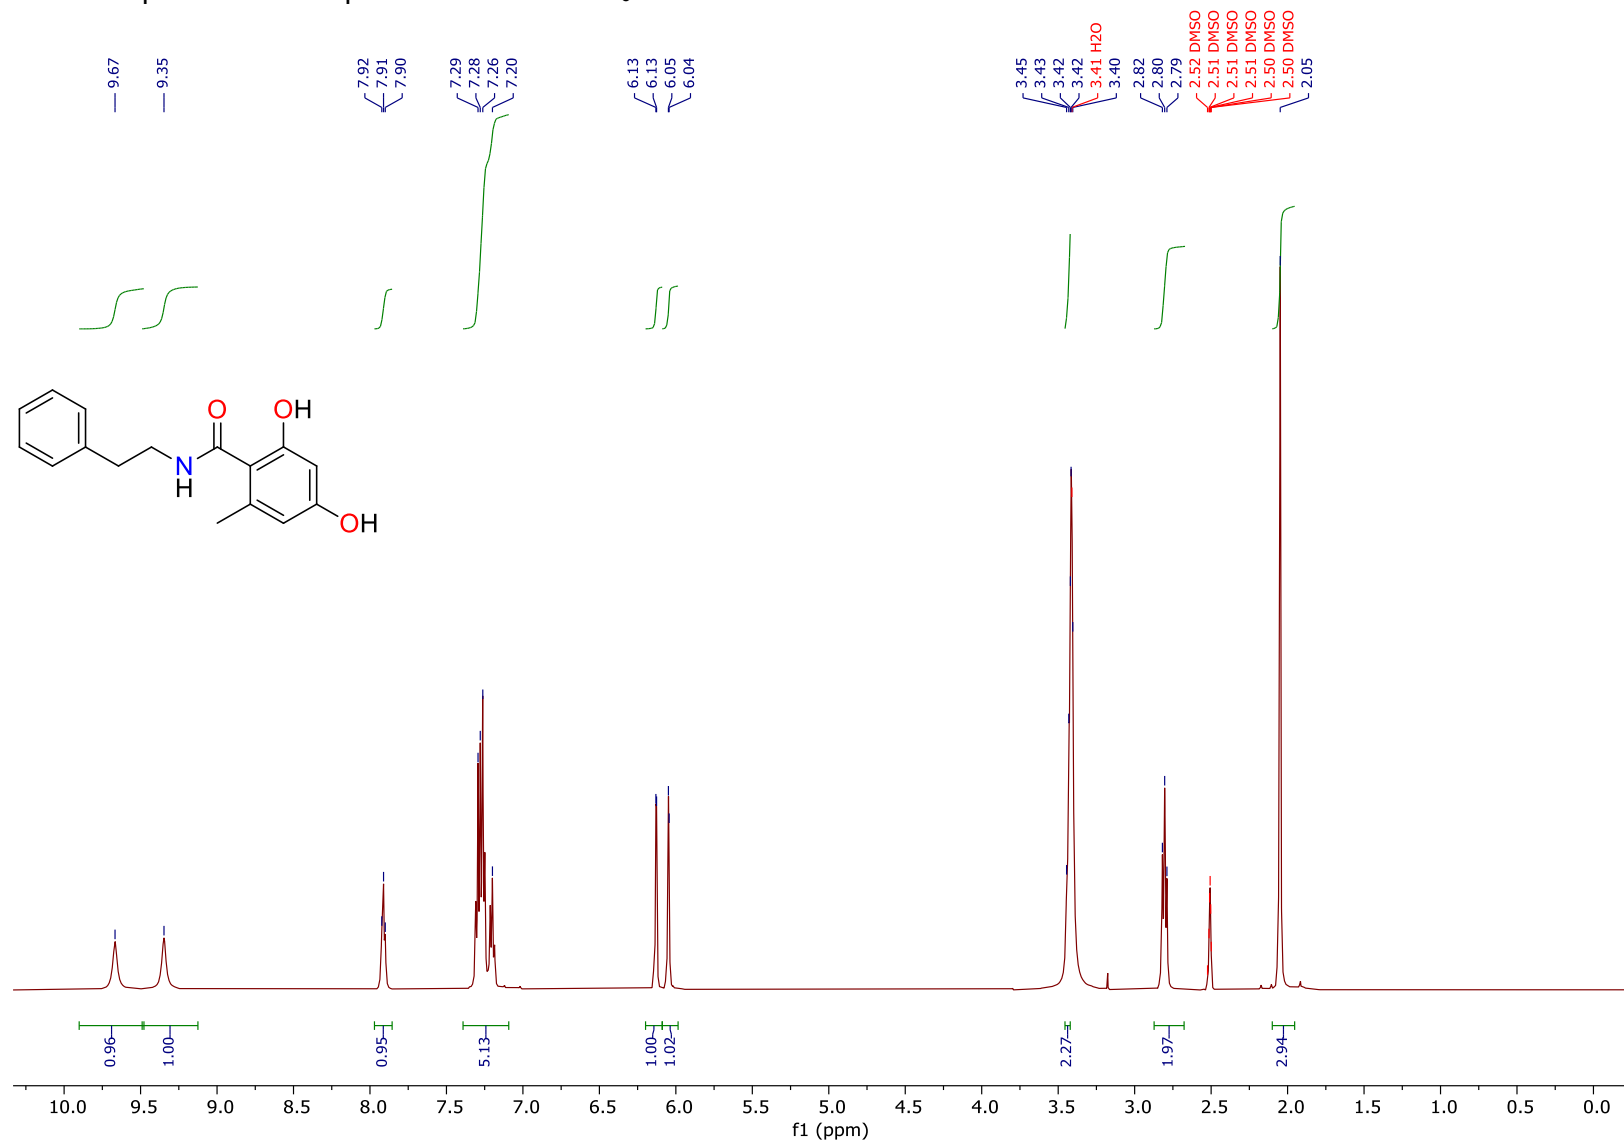

<sup>1</sup>H NMR spectrum of compound **12** in DMSO-*d*<sub>6</sub> and D<sub>2</sub>O

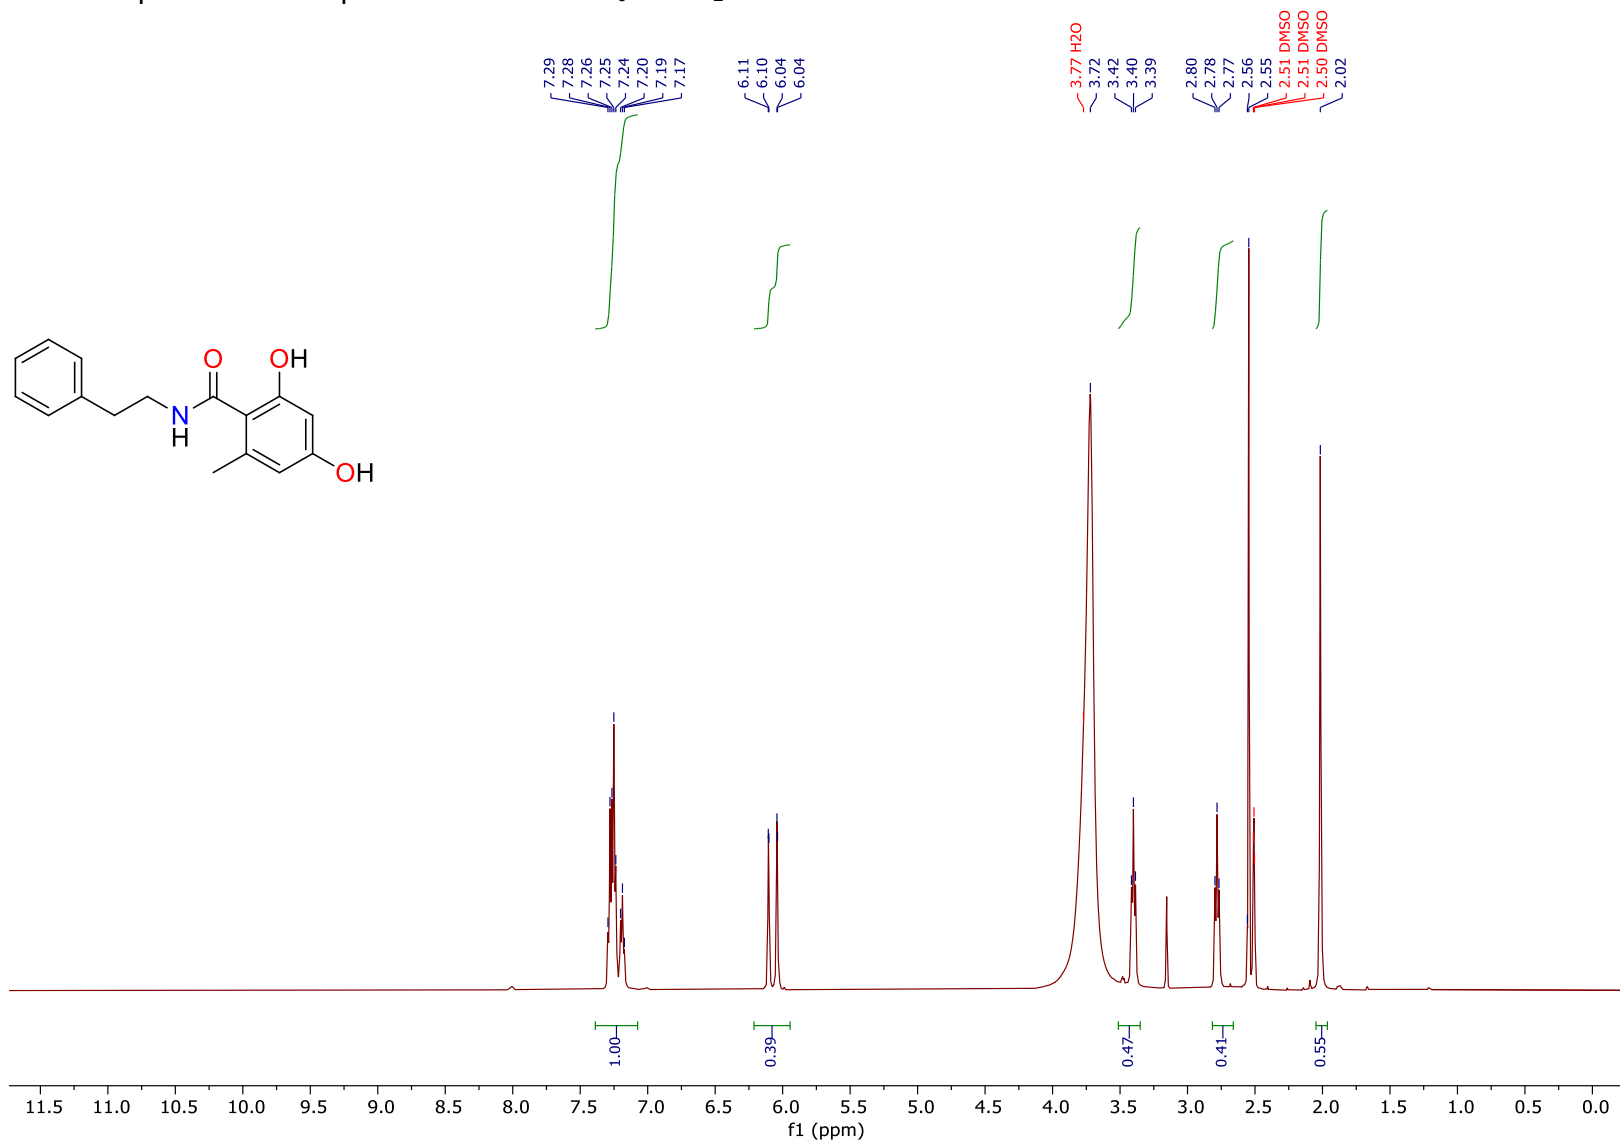

<sup>13</sup>C NMR spectrum of compound **12** in DMSO-*d*<sub>6</sub>

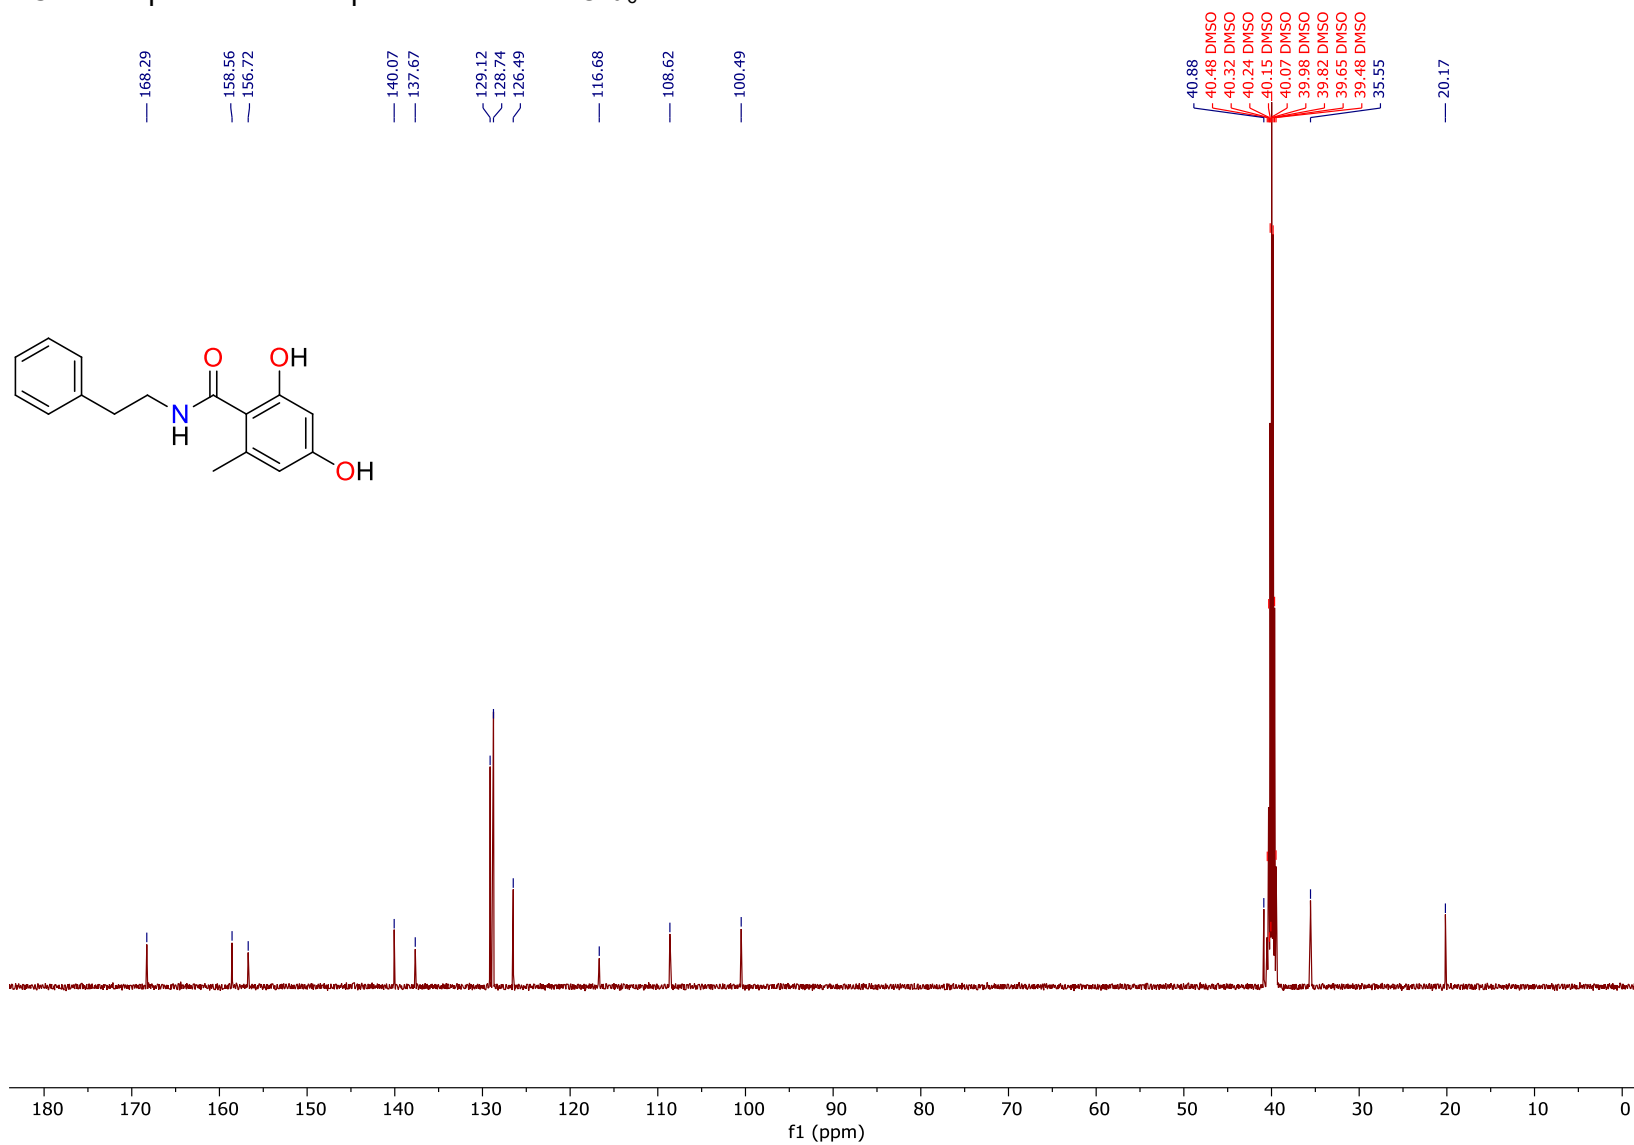

HSQC spectrum of compound **12** in DMSO- $d_6$

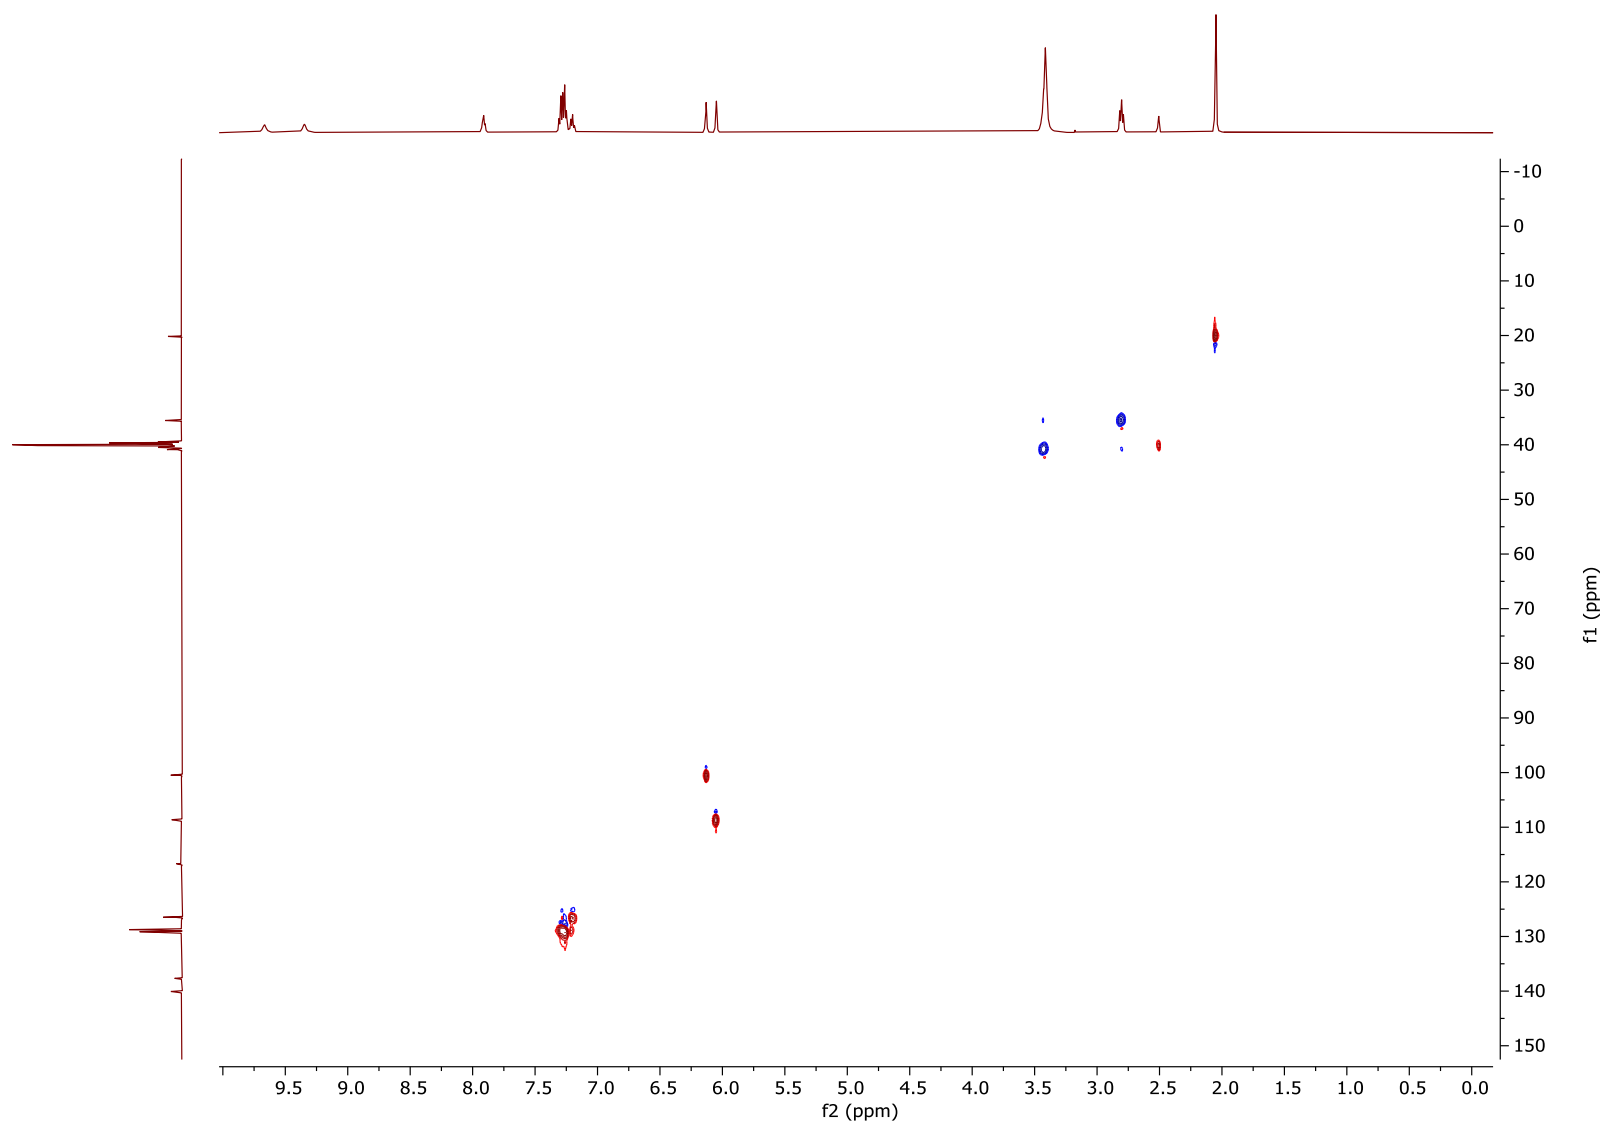

HMBC spectrum of compound **12** in DMSO-*d*<sub>6</sub>

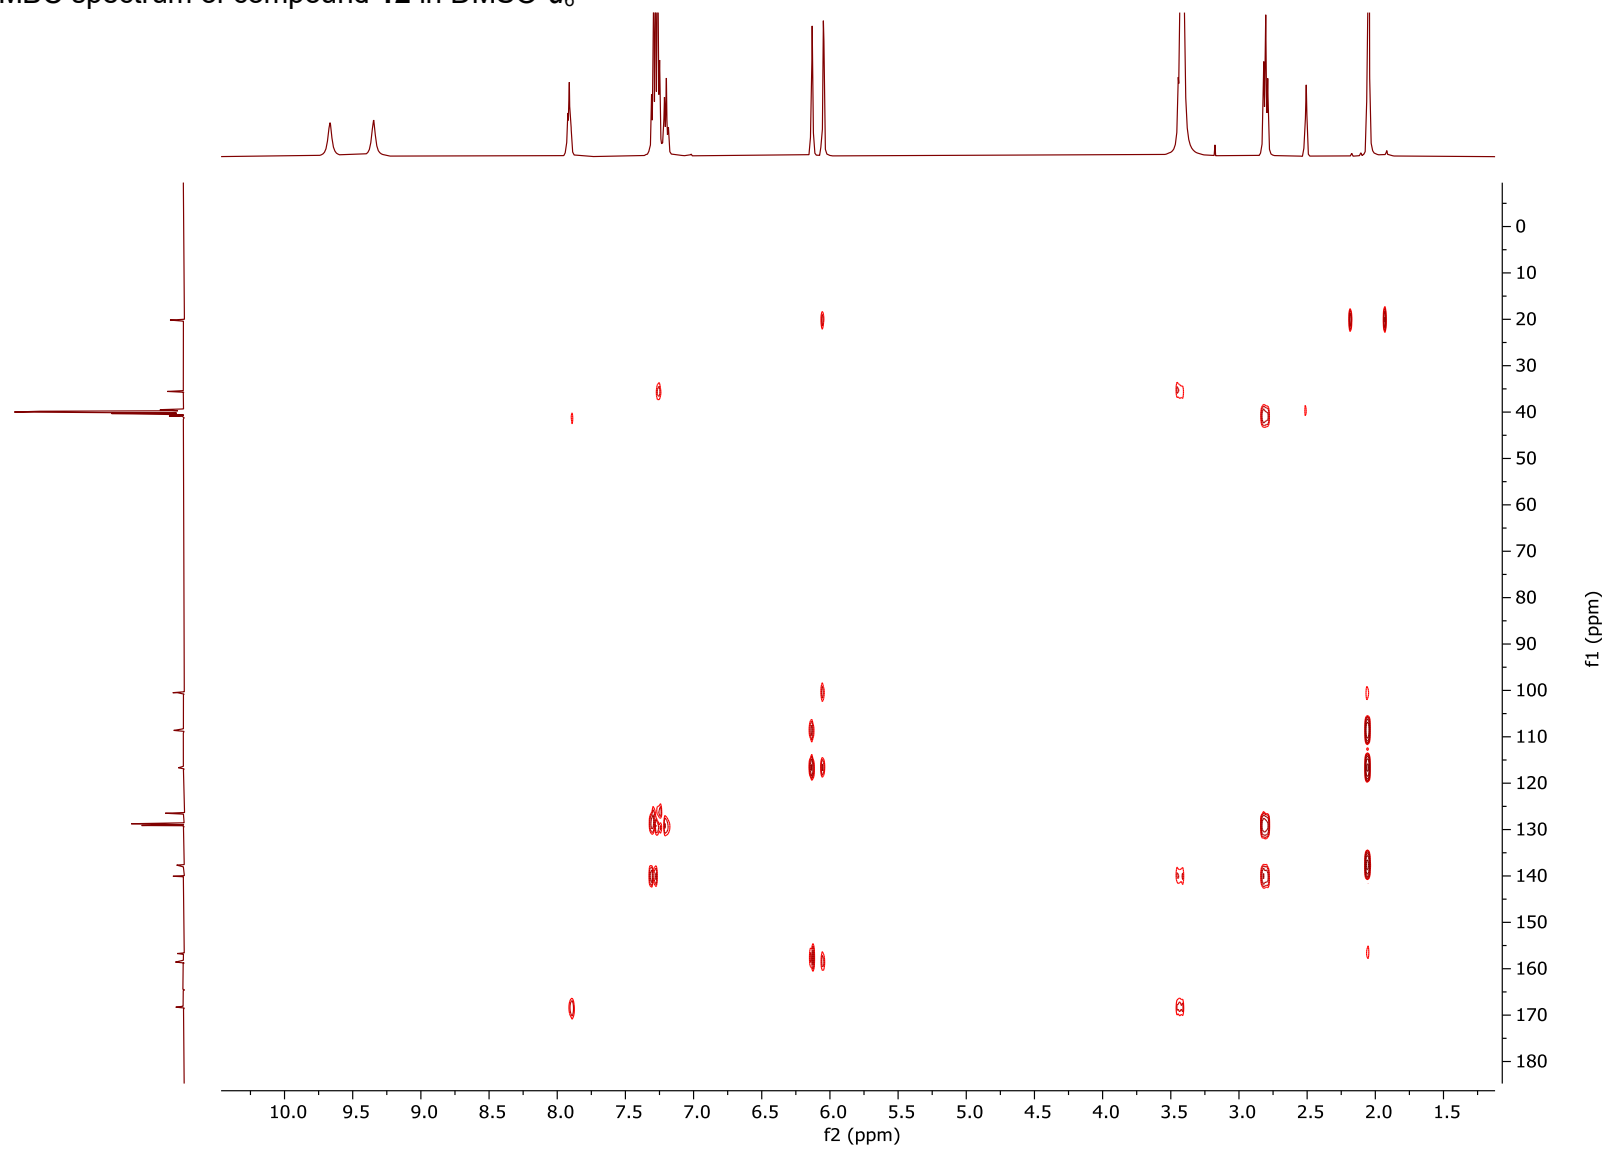

COSY spectrum of compound **12** in DMSO- $d_6$

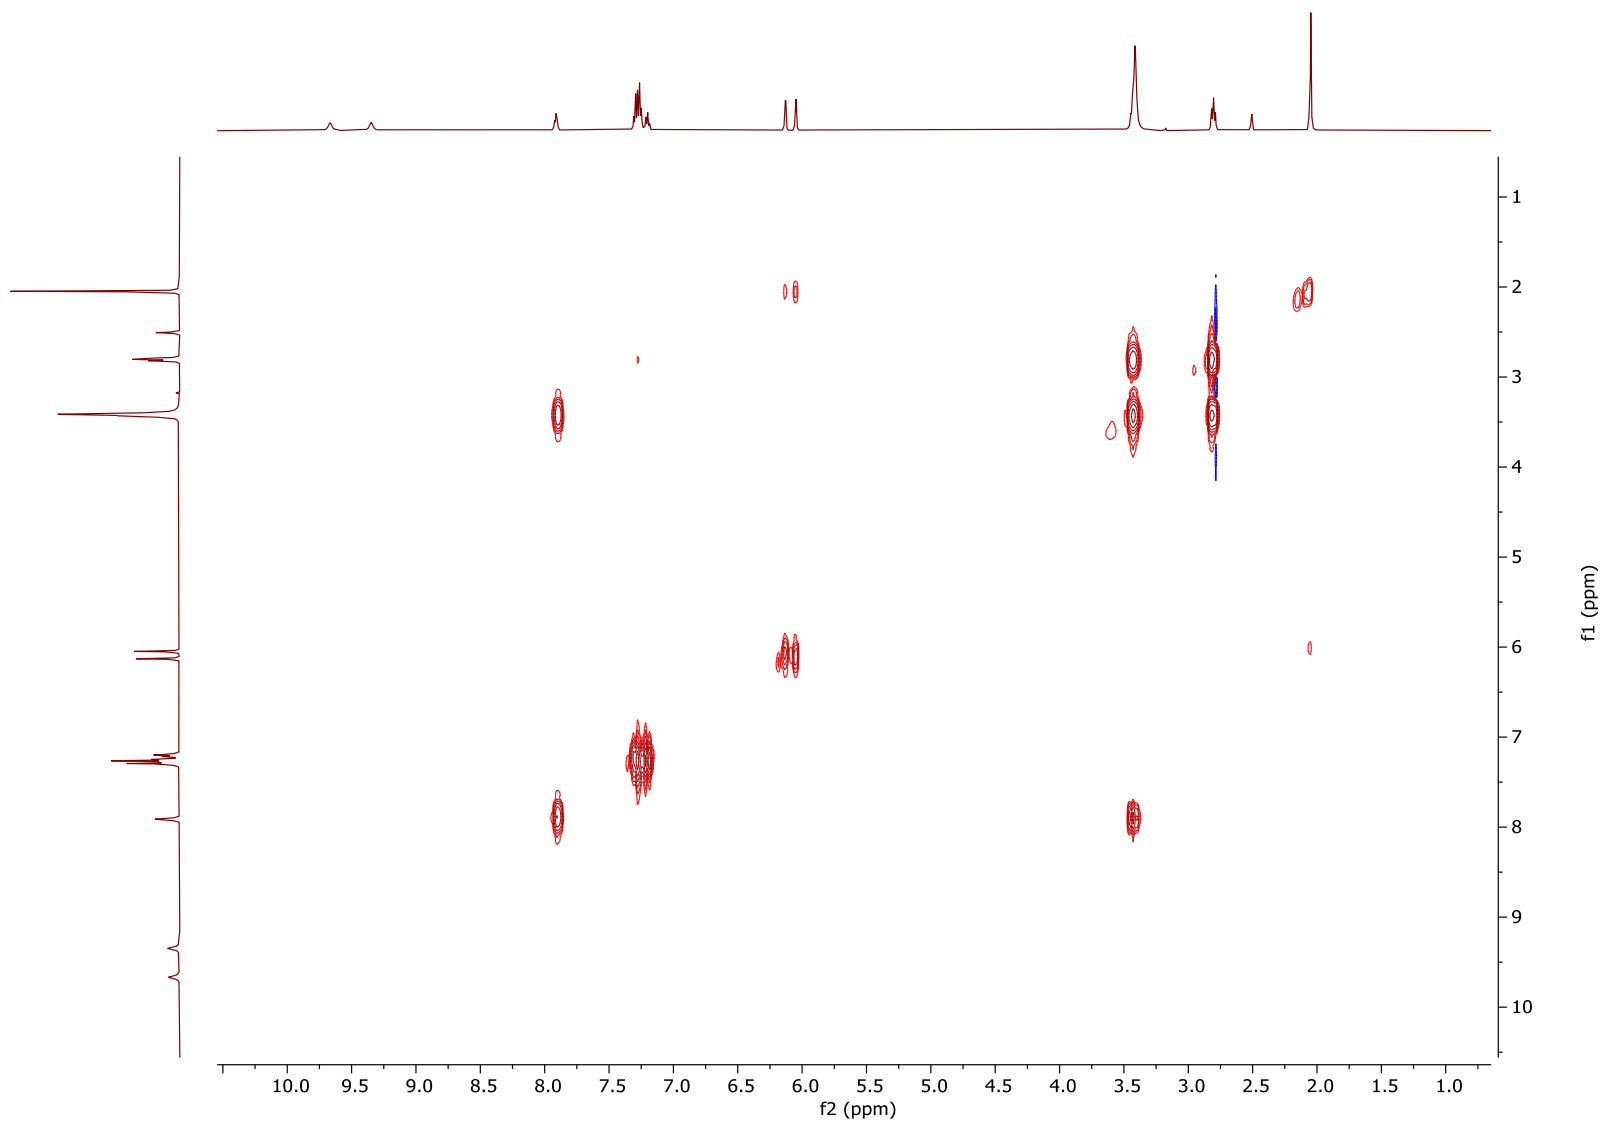

ROESY spectrum of compound **12** in DMSO- $d_6$

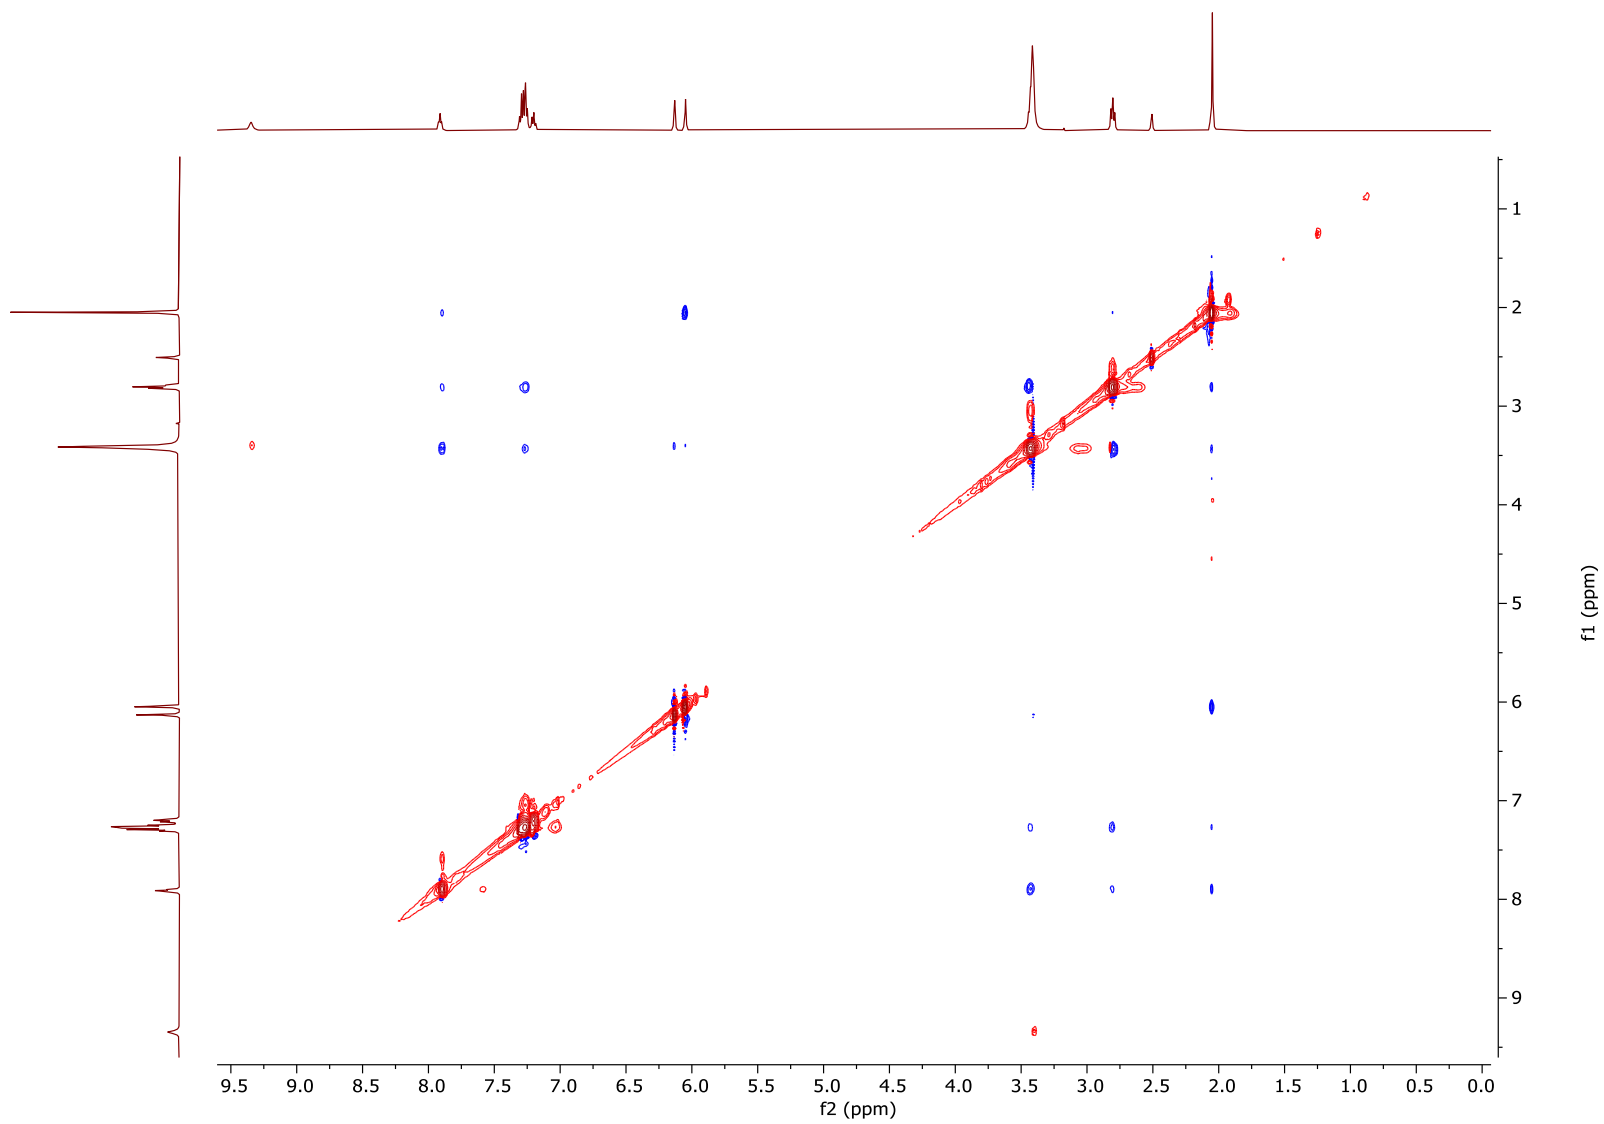

NMR data table for compound **12** in DMSO-*d*<sub>6</sub><sup>a</sup>

| Position | $\delta_{\text{H}}$ (mult., <i>J</i> in Hz) | $\delta_{\text{C}}$ , type | COSY                  | HMBC                                       | ROESY                                                      |
|----------|---------------------------------------------|----------------------------|-----------------------|--------------------------------------------|------------------------------------------------------------|
| 1        |                                             | 116.7, C                   |                       |                                            |                                                            |
| 2        |                                             | 156.7, C                   |                       |                                            |                                                            |
| 2-OH     | 9.67 (brs)                                  |                            |                       |                                            |                                                            |
| 3        | 6.13 (d, 2.0)                               | 100.5, CH                  | 5,6-Me,8 <sup>w</sup> | 1,2,4,5,7 <sup>w</sup>                     | 4-OH <sup>w</sup> ,6-Me <sup>w</sup> ,7-NH <sup>w</sup> ,8 |
| 4        |                                             | 158.6, C                   |                       |                                            |                                                            |
| 4-OH     | 9.35 (brs)                                  |                            |                       |                                            | 3,5                                                        |
| 5        | 6.05 (d, 2.0)                               | 108.6, CH                  | 3,6-Me                | 1,2,3,6-Me,7 <sup>w</sup>                  | 4-OH <sup>w</sup> ,6-Me                                    |
| 6        |                                             | 137.7, C                   |                       |                                            |                                                            |
| 6-Me     | 2.05 (s)                                    | 20.2, CH <sub>3</sub>      | 3,5                   | 1,2,3 <sup>w</sup> ,5,6,7 <sup>w</sup> ,10 | 5,7-NH,8,9                                                 |
| 7        |                                             | 168.3, C                   |                       |                                            |                                                            |
| 7-NH     | 7.91 (t, 5.5)                               |                            | 8                     | 7,8                                        | 6-Me,8,9,15 <sup>w</sup>                                   |
| 8        | 3.42 (dt, 5.5, 7.4)                         | 40.9, CH <sub>2</sub>      | 7-NH,9                | 7,9,10                                     | 3 <sup>w</sup> ,6-Me <sup>w</sup> ,7-NH,9,11,15            |
| 9        | 2.80 (t, 7.4)                               | 35.6, CH <sub>2</sub>      | 8,11,13,15            | 8,10,11,15                                 | 6-Me,7-NH <sup>w</sup> ,8,11,15                            |
| 10       |                                             | 140.1, C                   |                       |                                            |                                                            |
| 11       | 7.26 (br d, 7.3)                            | 129.1, CH                  | 9 <sup>w</sup> ,12    | 9,12,13,14,15                              | 8,9                                                        |
| 12       | 7.29 (br dd, 7.1, 7.3)                      | 126.5, CH                  | 11,13                 | 10,11,14,15                                |                                                            |
| 13       | 7.20 (tt, 7.1, 1.6)                         | 128.7, CH                  | 11,12,14,15           | 11,15                                      |                                                            |
| 14       | 7.29 (br dd, 7.1, 7.3)                      | 126.5, CH                  | 13,15                 | 10,11,12,15                                |                                                            |
| 15       | 7.26 (br d, 7.3)                            | 129.1, CH                  | 9 <sup>w</sup> ,14    | 9,11,12,13,14                              | 8,9                                                        |

<sup>a</sup> Spectra recorded at 25 °C (500 MHz for <sup>1</sup>H NMR and 125 MHz for <sup>13</sup>C NMR); <sup>w</sup> Weak correlation.

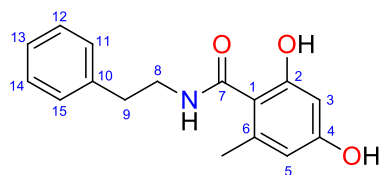

High resolution mass spectrum of compound **12**

## Mass Spectrum SmartFormula Report

### Analysis Info

Analysis Name D:\Data\Sasha\20231004\RAD915M000001.d  
Method DirectInfusion\_2018\_pos.m  
Sample Name RAD915M  
Comment

Acquisition Date 10/4/2023 2:47:09 PM

Operator Demo User  
Instrument maXis II ETD

### Acquisition Parameter

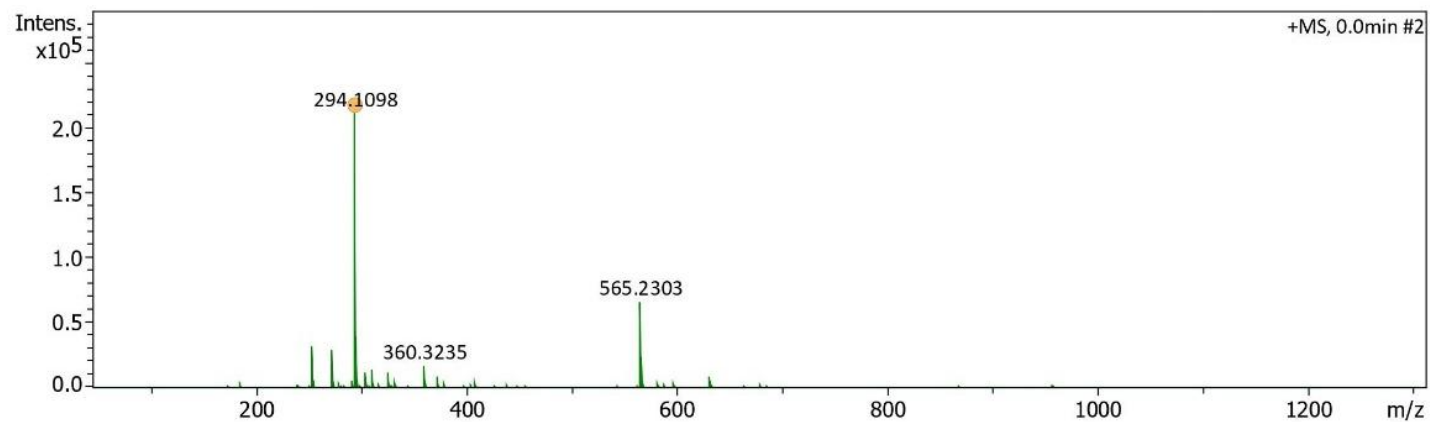

| Meas. m/z | # | Ion Formula                                       | m/z      | err [ppm] | mSigma | # mSigma | Score  | rdb | e <sup>-</sup> Conf | N-Rule |
|-----------|---|---------------------------------------------------|----------|-----------|--------|----------|--------|-----|---------------------|--------|
| 294.1098  | 1 | C <sub>16</sub> H <sub>17</sub> NNaO <sub>3</sub> | 294.1101 | 0.8       | 3.0    | 1        | 100.00 | 9.0 | even                | ok     |

<sup>1</sup>H NMR spectrum of compound **13** in DMSO-*d*<sub>6</sub>

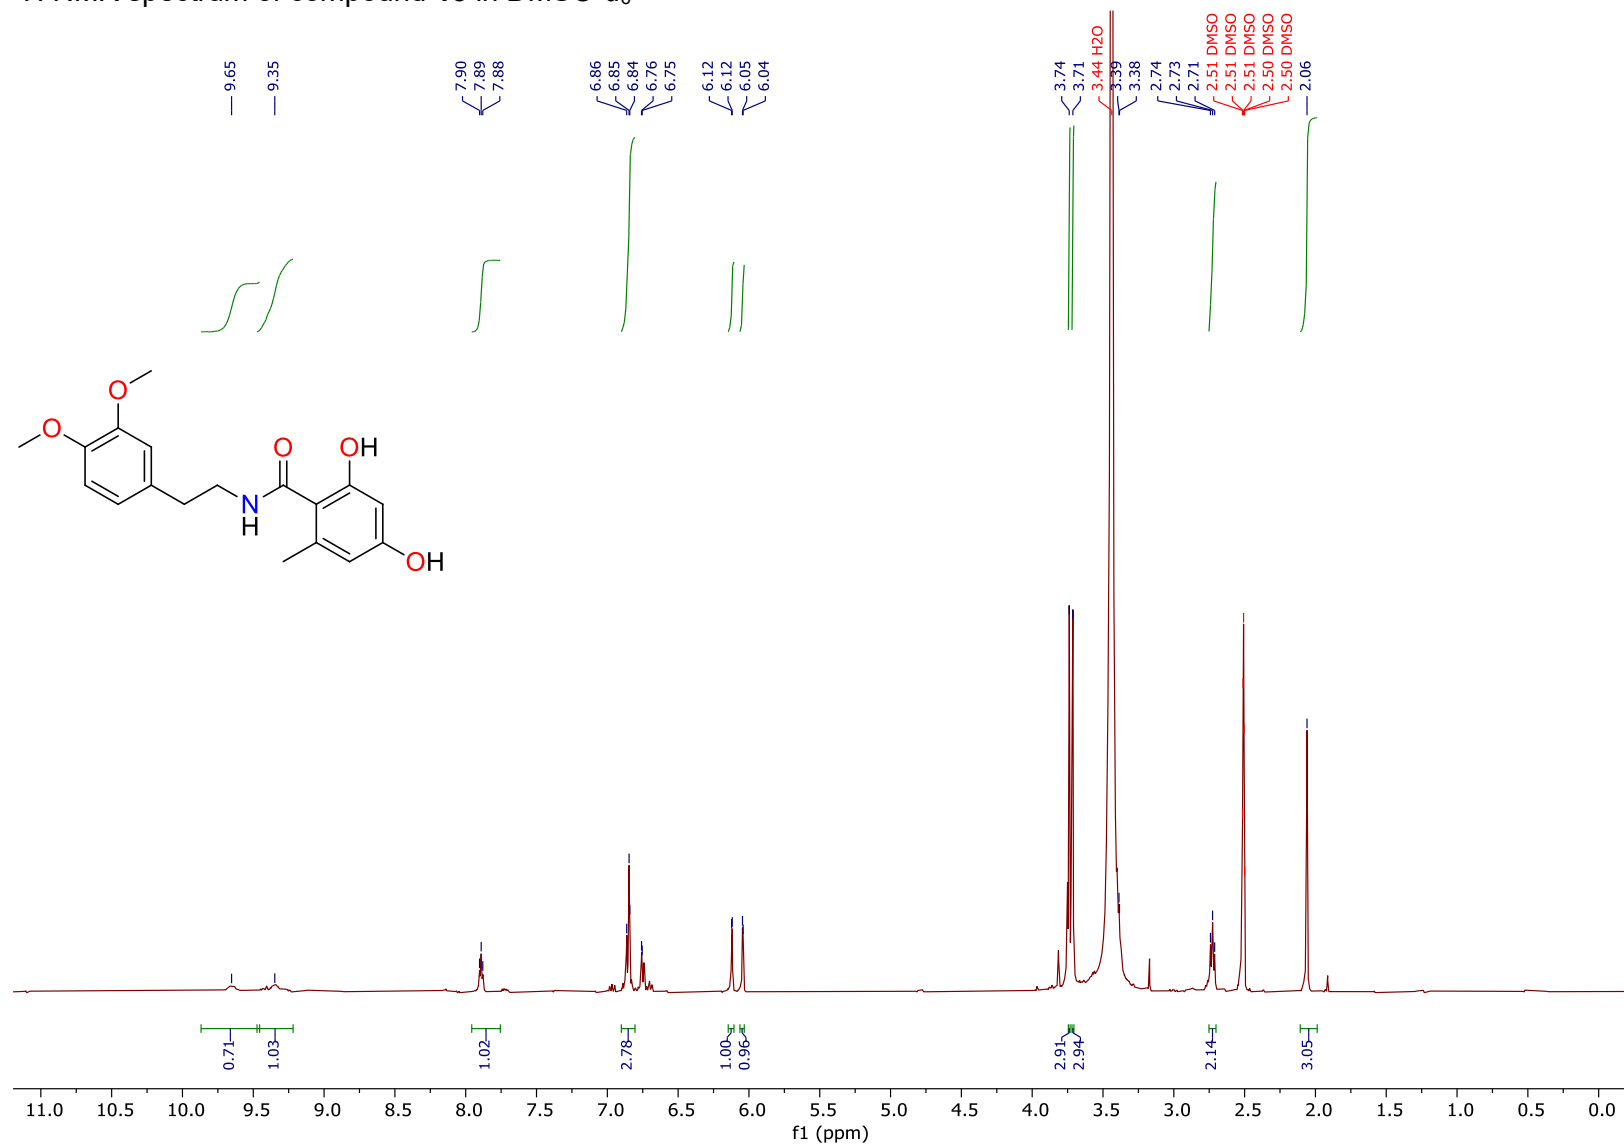

<sup>13</sup>C NMR spectrum of compound **13** in DMSO-d<sub>6</sub>

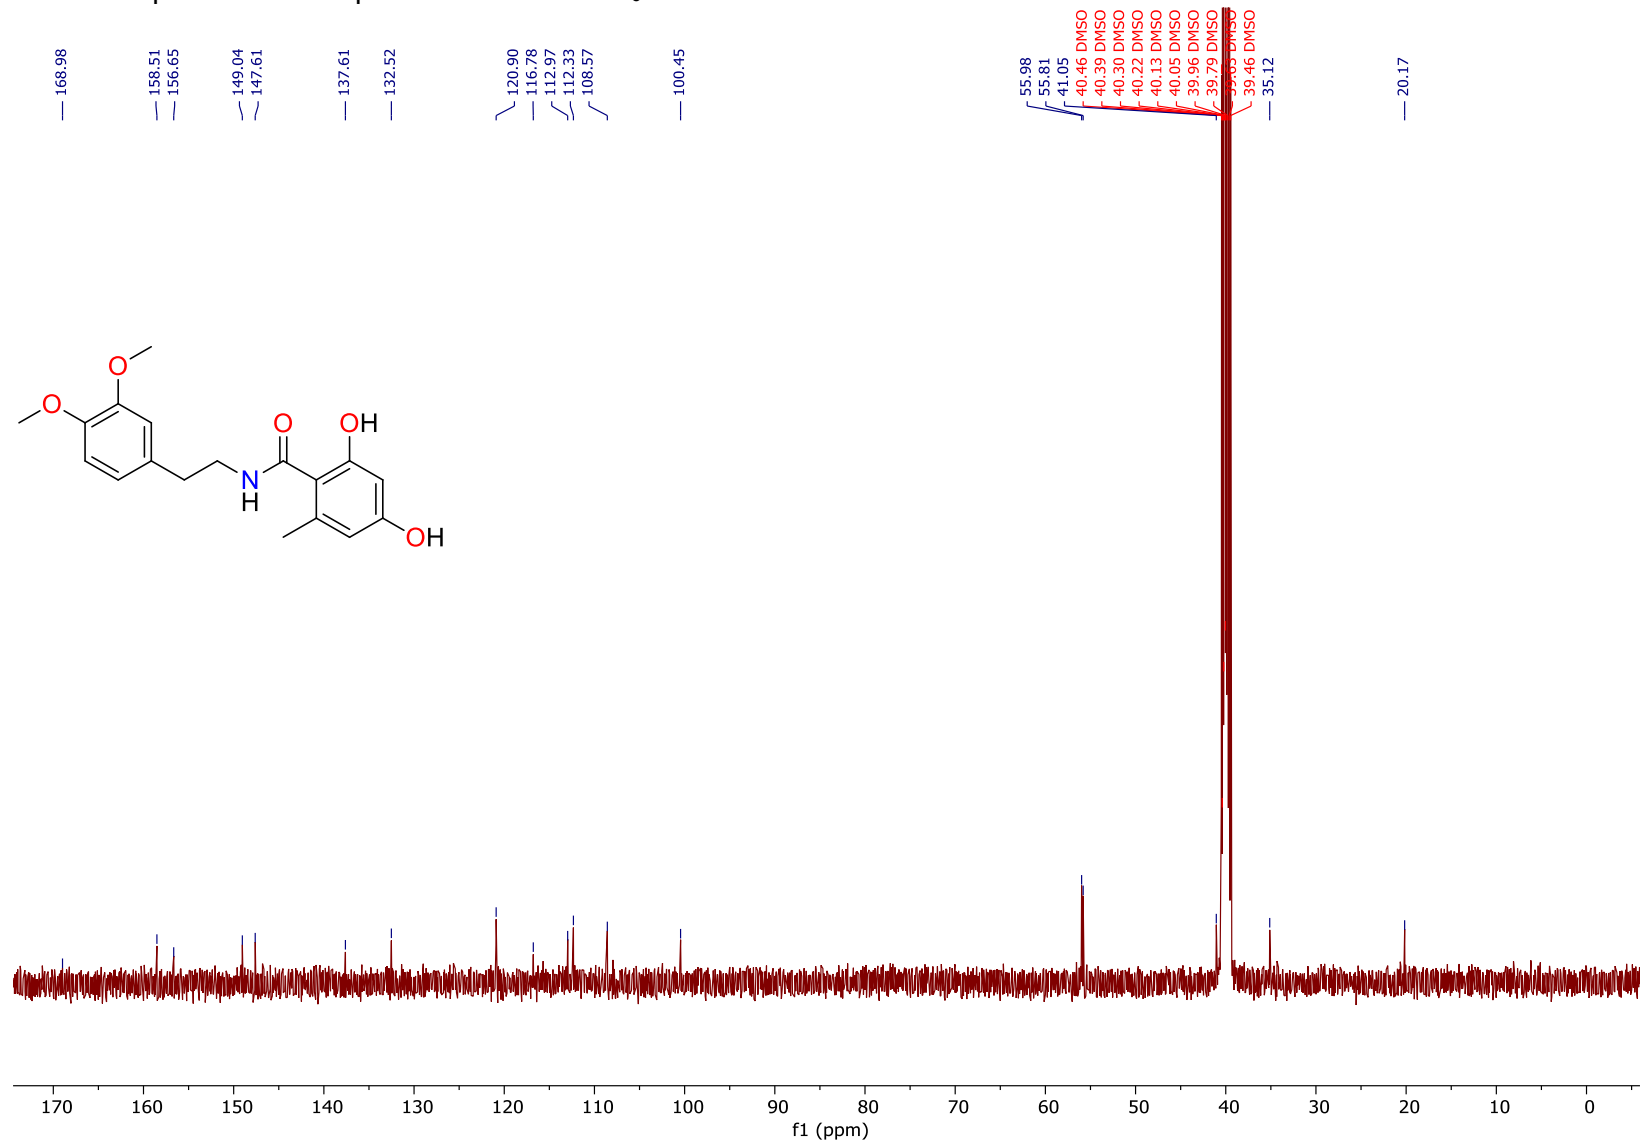

HSQC spectrum of compound **13** in DMSO- $d_6$

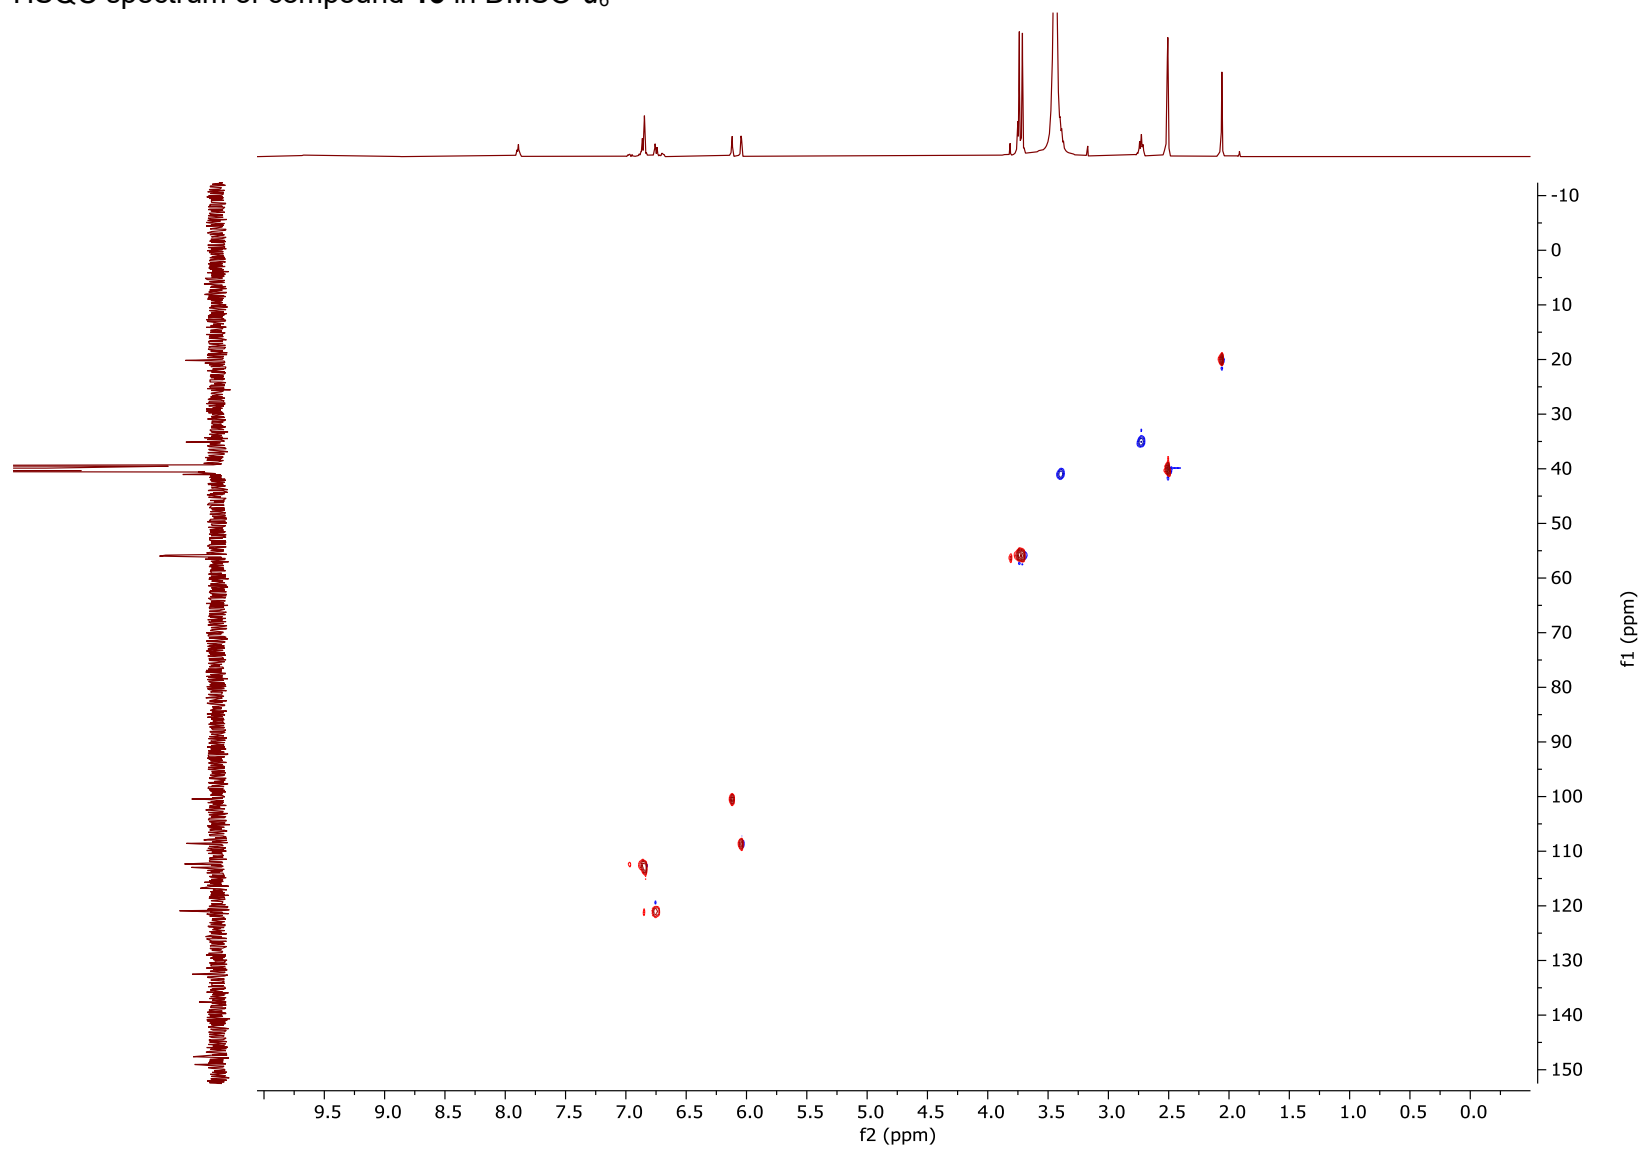

HMBC spectrum of compound **13** in DMSO-*d*<sub>6</sub>

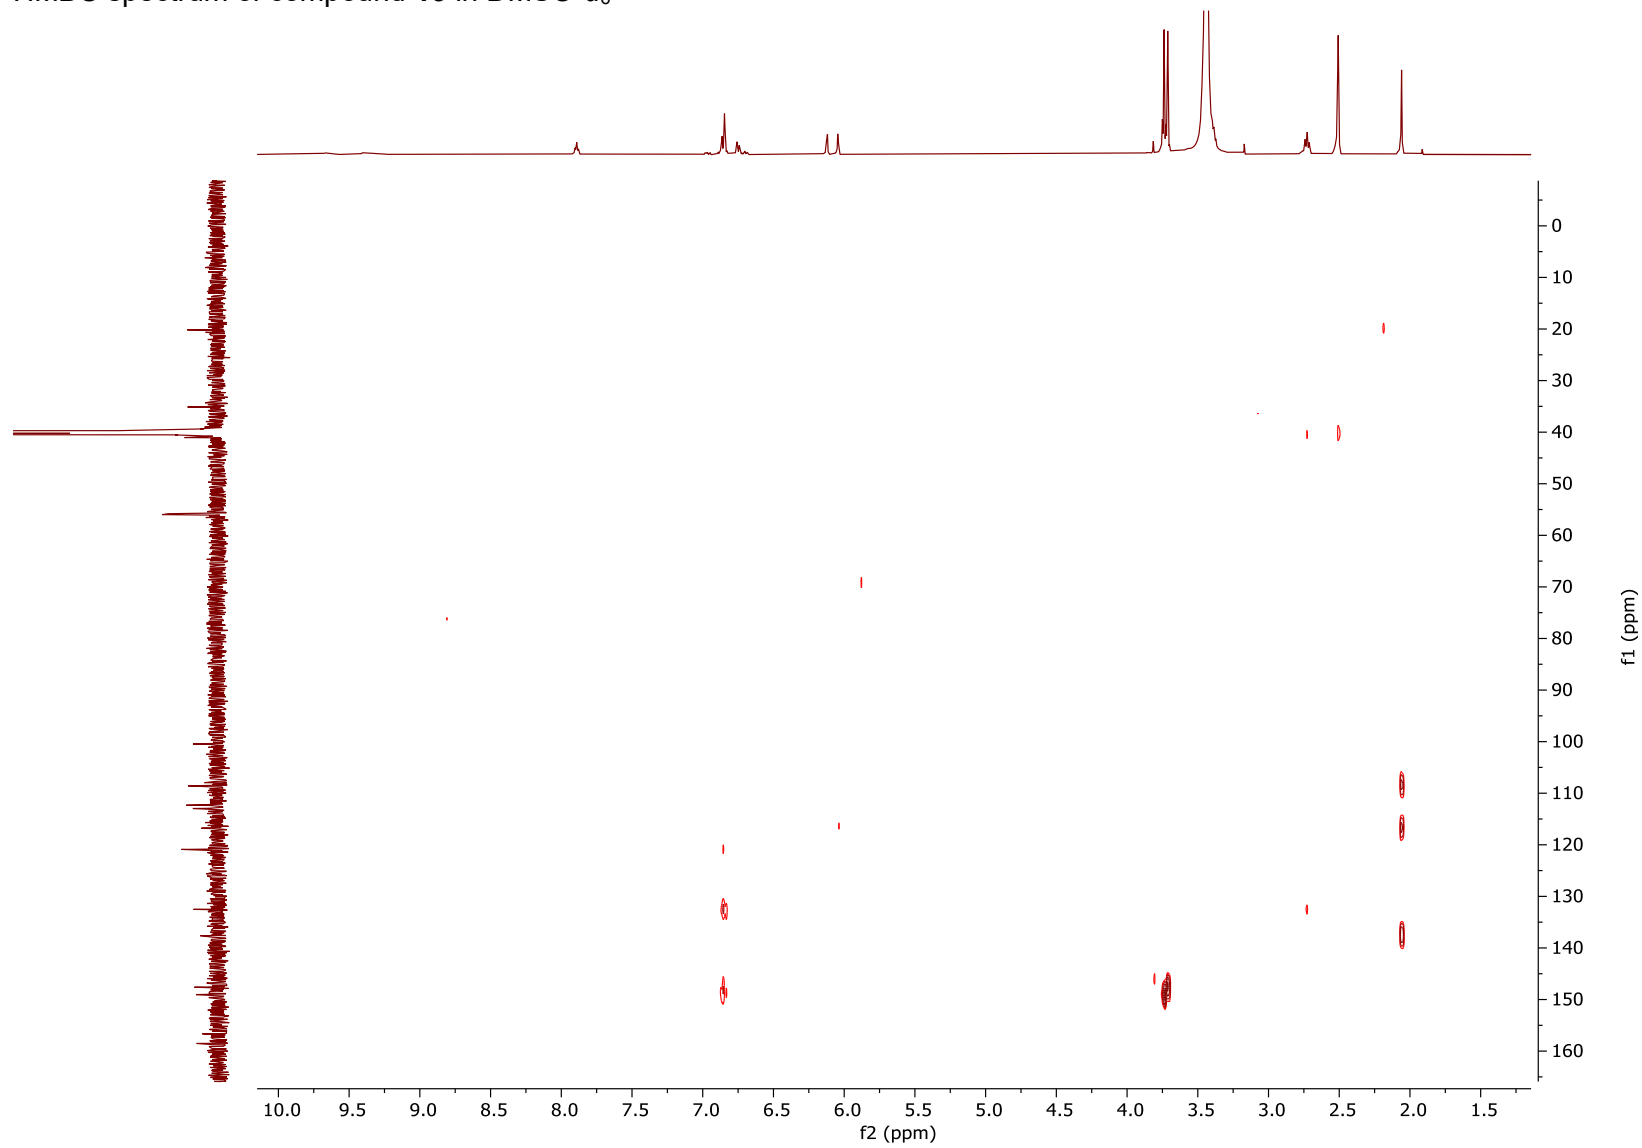

COSY spectrum of compound **13** in DMSO-*d*<sub>6</sub>

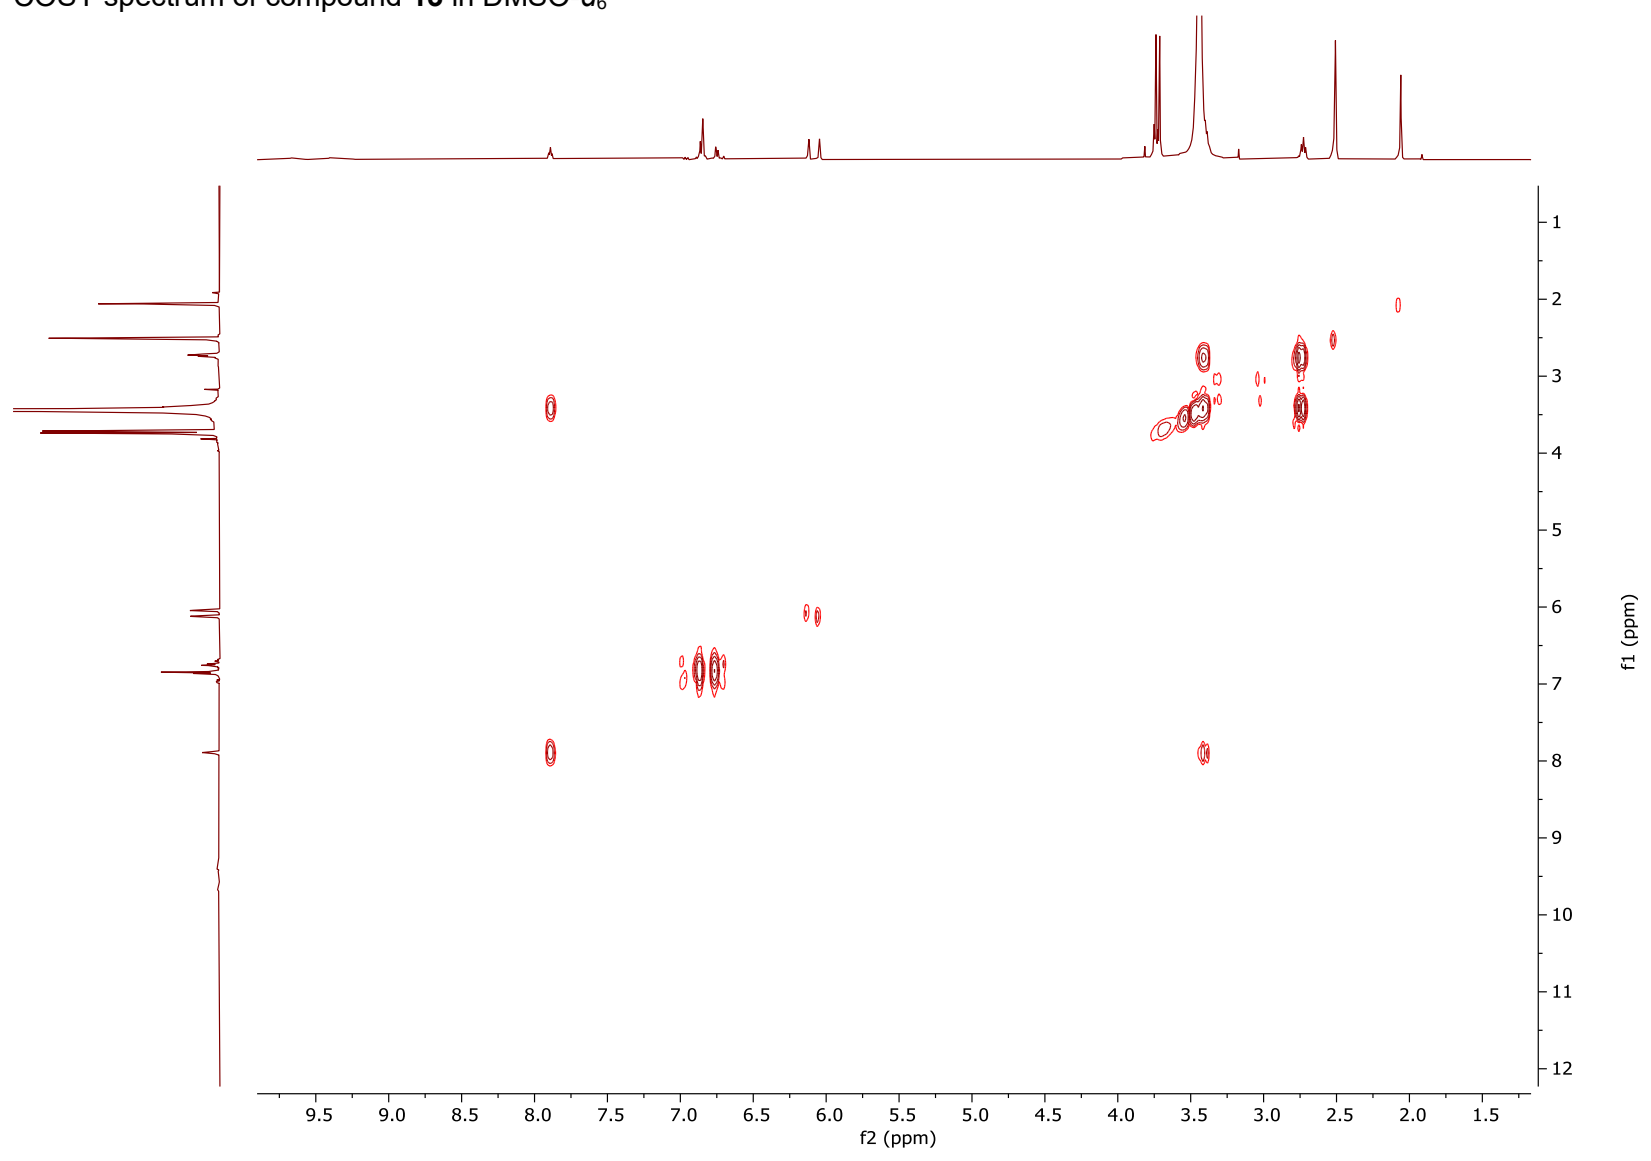

ROESY spectrum of compound **13** in DMSO- $d_6$

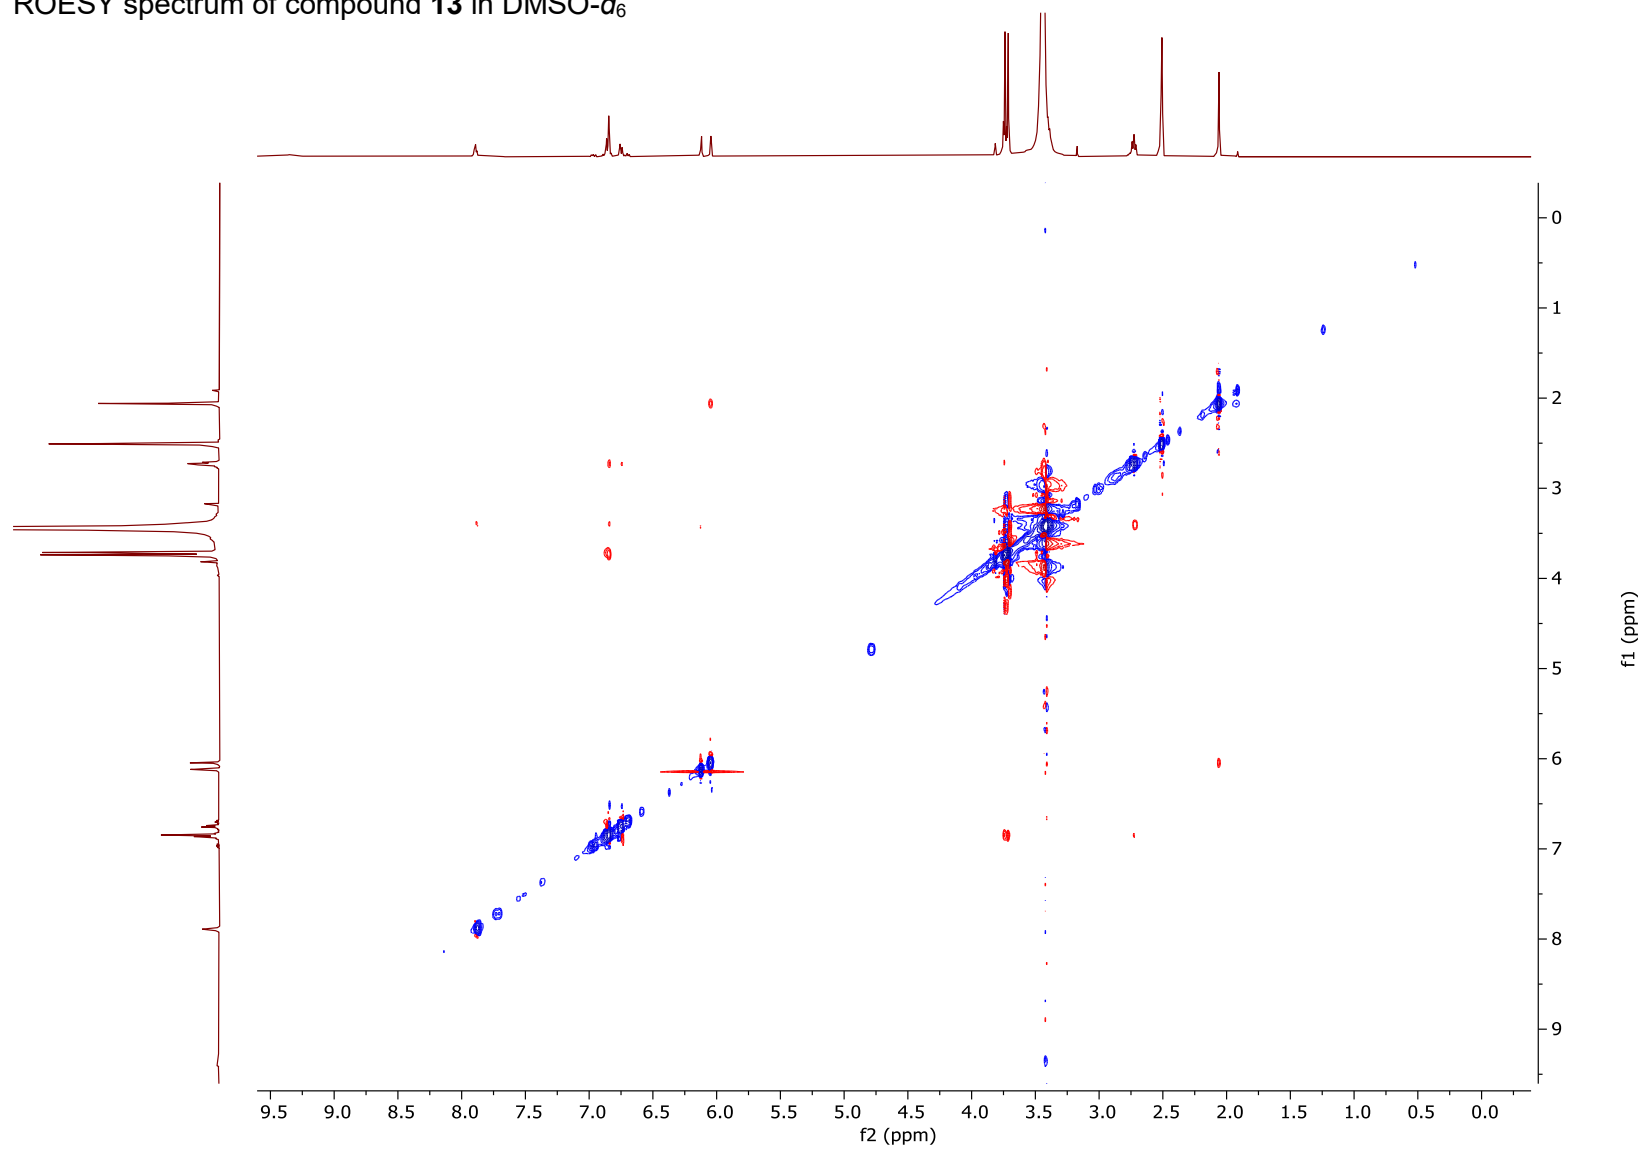

NMR data table for compound **13** in DMSO- $d_6^a$

| Position | $\delta_H$ (mult., $J$ in Hz) | $\delta_C$ , type     | COSY                | HMBC                     | ROESY          |
|----------|-------------------------------|-----------------------|---------------------|--------------------------|----------------|
| 1        |                               | 116.8, C              |                     |                          |                |
| 2        |                               | 156.7, C              |                     |                          |                |
| 2-OH     | 9.65 (brs)                    |                       |                     |                          |                |
| 3        | 6.12 (d, 2.0)                 | 100.5, CH             | 5,6-Me <sup>w</sup> | 1                        |                |
| 4        |                               | 158.5, C              |                     |                          |                |
| 4-OH     | 9.35 (brs)                    |                       |                     |                          |                |
| 5        | 6.04 (d, 2.0)                 | 108.6, CH             | 3,6-Me <sup>w</sup> | 1,6-Me <sup>w</sup>      | 6-Me           |
| 6        |                               | 137.6, C              |                     |                          |                |
| 6-Me     | 2.06 (s)                      | 20.2, CH <sub>3</sub> | 5                   | 1,5,6                    | 5              |
| 7        |                               | 169.0, C              |                     |                          |                |
| 7-NH     | 7.89 (t, 5.5)                 | -                     | 8                   |                          | 8              |
| 8        | 3.39 (dt, 5.5, 7.4)           | 41.1, CH <sub>2</sub> | 7-NH,9              | 9                        | 7-NH,8,9,11,15 |
| 9        | 2.73 (t, 7.4)                 | 35.1, CH <sub>2</sub> | 8                   | 8,10,11 <sup>w</sup> ,15 | 8,11,15        |
| 10       |                               | 132.5, C              |                     |                          |                |
| 11       | 6.84 (d, 2.0)                 | 113.0, CH             | 9 <sup>w</sup>      | 10,12,15                 | 8,9,12-OMe     |
| 12       |                               | 149.0, C              |                     |                          |                |
| 12-OMe   | 3.71 (brs)                    | 56.0, CH <sub>3</sub> | 11                  | 12                       | 11             |
| 13       |                               | 147.6, C              |                     |                          |                |
| 13-OMe   | 3.74 (brs)                    | 55.8, CH <sub>3</sub> | 12-OMe              | 13                       | 14             |
| 14       | 6.86 (d, 8.0)                 | 112.3, CH             | 15                  | 10,12 <sup>w</sup>       | 13-OMe         |
| 15       | 6.75 (dd, 2.0, 8.0)           | 120.9, CH             |                     | 14 <sup>w</sup>          | 9              |

<sup>a</sup> Spectra recorded at 25 °C (500 MHz for <sup>1</sup>H NMR and 125 MHz for <sup>13</sup>C NMR); <sup>w</sup> Weak correlation.

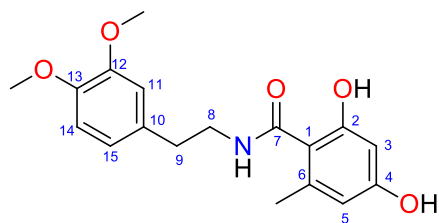

# High resolution mass spectrum of compound 13

## Mass Spectrum SmartFormula Report

### Analysis Info

Analysis Name D:\Data\Sasha\20231004\RAD915I000001.d  
Method DirectInfusion\_2018\_pos.m  
Sample Name RAD915I  
Comment

Acquisition Date 10/4/2023 2:28:42 PM

Operator Demo User  
Instrument maXis II ETD

### Acquisition Parameter

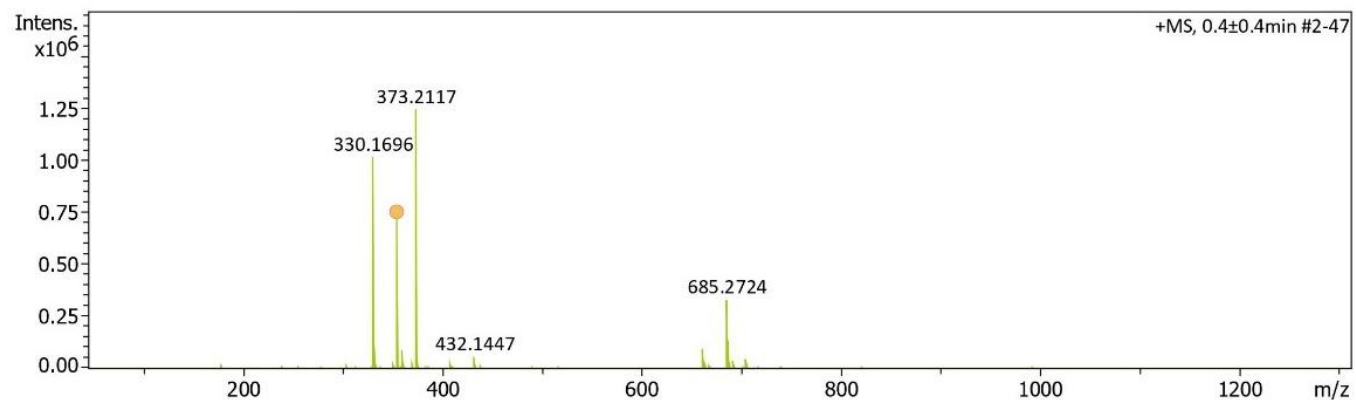

| Meas. m/z | # | Ion Formula                                        | m/z      | err [ppm] | mSigma | # mSigma | Score  | rdb  | e <sup>-</sup> Conf | N-Rule |
|-----------|---|----------------------------------------------------|----------|-----------|--------|----------|--------|------|---------------------|--------|
| 354.1308  | 1 | C <sub>18</sub> H <sub>21</sub> NNaO <sub>5</sub>  | 354.1312 | 1.2       | 0.7    | 1        | 100.00 | 9.0  | even                | ok     |
|           | 2 | C <sub>19</sub> H <sub>17</sub> N <sub>5</sub> NaO | 354.1325 | 5.0       | 14.1   | 2        | 35.81  | 14.0 | even                | ok     |
